# Supplementary material for: The formation of photodegradable nitrophenylene polymersviaring-opening metathesis polymerization
Source: Royal Society of Chemistry journal article supplement (doi:10.1039/d2py00684g), 2022-01-01
Supplement: d2py00684g1.pdf [file d2py00684g1.pdf]

Supplementary Information

**The Formation of Photodegradable Nitrophenylene  
Polymers via Ring-Opening Metathesis  
Polymerization**

Bonwoo Koo,†<sup>a</sup> Dopil Kim,†<sup>a</sup> Da Yong Song,†<sup>a</sup>, Woo Joo Han,<sup>a</sup> Dongwook Kim,<sup>b</sup> Jae Woo Park,<sup>\*a</sup>  
Min Kim<sup>\*a</sup> and Cheoljae Kim<sup>\*a</sup>

a. Department of Chemistry, Chungbuk National University, Cheongju 28644, Korea

b. Center for Catalytic Hydrocarbon Functionalizations, Institute for Basic Science(IBS),  
Daejeon 34141, Korea

## Table of Contents

|                                                                      | Page |
|----------------------------------------------------------------------|------|
| 1. General information                                               | S3   |
| 2. Preparation of monomers                                           | S4   |
| 3. Polymerization                                                    | S10  |
| 4. Photodegradations of polymers <b>4bP</b> and <b>7bP</b>           | S19  |
| 5. Computational Details                                             | S21  |
| 6. $^1\text{H}$ NMR and $^{13}\text{C}$ NMR spectra                  | S22  |
| 7. Data tables for the obtained X-ray crystal structures of monomers | S42  |
| 8. Calculated open-structures of monomers                            | S91  |
| 9. Reference                                                         | S104 |

## 1. General information

All used commercially available chemicals were used without further purification. Dichloromethane (DCM) and tetrahydrofuran (THF) were obtained from a solvent purification system. All commercial reagents and solvents except DCM and THF were used directly without further purification. Analytical thin layer chromatography (TLC) analysis was carried out on the pre-coated silica gel 60 F254 glass plates, and flash column chromatography was performed on silica gel (400-630 mesh).  $^1\text{H}$  NMR was recorded by Bruker AVANCE 400 (400 MHz) and AVANCE 500 (500 MHz) spectrometers. Chemical shifts for NMR were quoted in parts per million (ppm) referenced to the appropriate solvent peak ( $\text{CDCl}_3$  = 7.26 ppm,  $\text{CD}_2\text{Cl}_2$  = 5.30 ppm, DMSO = 2.50 ppm). The abbreviation codes were used to describe  $^1\text{H}$  NMR peak patterns; s = singlet, d = doublet, t = triplet, q = quartet, quint = quintet and m = multiplet. Coupling constants,  $J$ , were reported in Hertz unit (Hz).  $^{13}\text{C}$  NMR was recorded by Bruker AVANCE 400 (100 MHz) and 500 (125 MHz) and was fully decoupled by broad band decoupling. Chemical shifts of the  $^{13}\text{C}$  NMR spectra were measured relative to  $\text{CDCl}_3$  (77.00 ppm). Infrared (IR) spectra were recorded on Bruker Alpha FT-IR spectrometer. High-resolution (HR) ESI-MS measurements were performed using maXis 4G hybrid LC/Q-TOF system. High resolution mass spectra (HRMS) of compound **9** was obtained by electron impact (EI) ionization technique (magnetic sector – electric sector double focusing mass analyzer) from the KBSI (Korea Basic Science Institute Daegu Center). Gel permeation chromatography (GPC) analysis with refractive index (RI) detection was used to determine number average molecular weight ( $M_n$ ), weight average molecular weight ( $M_w$ ), and polydispersity ( $M_w/M_n$ ). RI measurements were performed using a set of instruments consisting of a Waters 1515 isocratic pump, a 2414 differential refractive index detector, and a column heating module with Shodex KF-803, KF-804 and KF-805 columns connected in series. The column was eluted with tetrahydrofuran (preservative-free HPLC grade, Fisher) at 1.0 mL/min at 40 °C and calibrated against standard polystyrene (PS) (Sigma Aldrich,  $M_p$  2,500-50,000). 36 W Osram Dulux® L BL UVA 36W/78 was used as UVA source for photodegradation. The data collection for single crystal structure analysis of samples was performed on a Bruker D8 QUEST diffractometer equipped with I $\mu$ s 3.0 Mo x-ray tube ( $\lambda$  = 0.71073Å) and Photon II detector. The selective crystals of samples were coated with Parabar oil for mounting on goniometer under a stream of  $\text{N}_2$  (g) at 173 K. The diffraction data were integrated, scaled, and reduced by using the Bruker APEX4 software. The crystal structures of samples were solved by SHELX structure solution program and refined by full-matrix least-squares calculations with the SHELXL.

## 2. Preparation of monomers

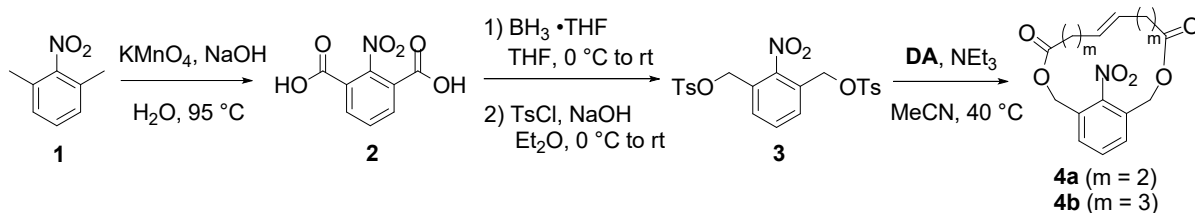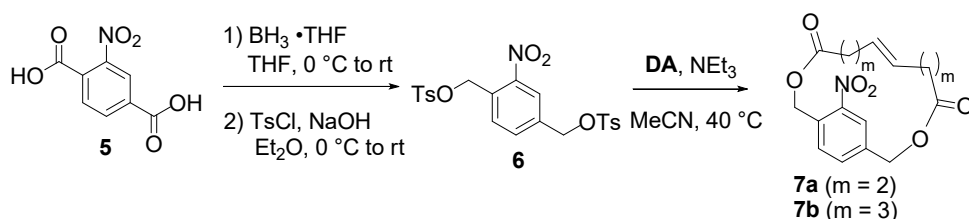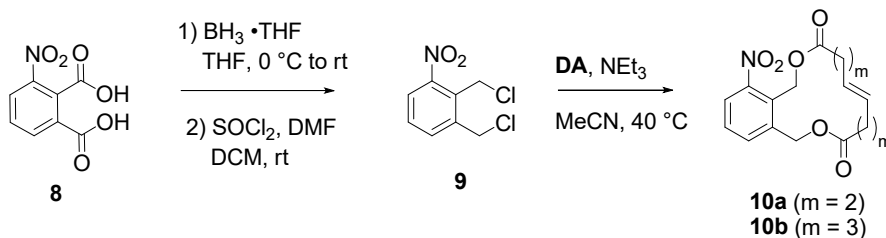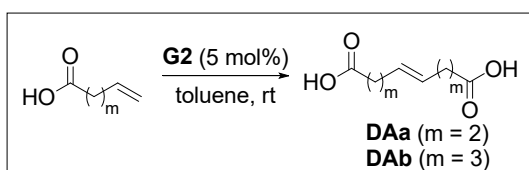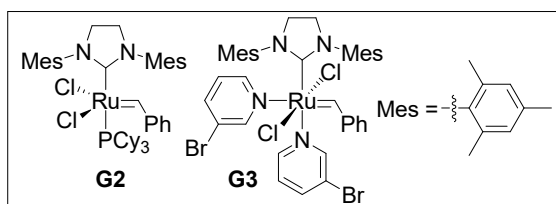

### 2-Nitroisophthalic acid 2

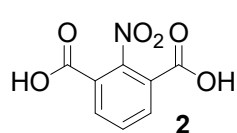

According to the literature,<sup>1</sup> a stirred mixture of 1,3-dimethyl-2-nitrobenzene 1 (6.00 g, 40.0 mmol, 1.0 equiv.) and sodium hydroxide (NaOH, 2.50 g, 62.5 mmol, 1.6 equiv.) in water (300 mL) was heated to 95 °C, then KMnO<sub>4</sub> (25.3 g, 160 mmol, 4.0 equiv.) was added in portions over a period of 3 h. The reaction mixture was refluxed for another 20 h and cooled to room temperature. The resulting mixture was filtered, and the filtrate was acidified with concentrated HCl. After drying the precipitate, the desired product 2 was obtained as white solid in 80% yield (6.77 g, 32.1 mmol).

<sup>1</sup>H NMR (DMSO-d<sub>6</sub>, 500 MHz, ppm) δ 14.14 (2H, br), 8.19 (2H, d, J = 7.8 Hz), 7.82 (1H, t, J = 7.8 Hz).

The spectral data are in complete agreement with the literature value.<sup>1</sup>

### (2-Nitro-1,3-phenylene)bis(methylene) bis(4-methylbenzenesulfonate) 3

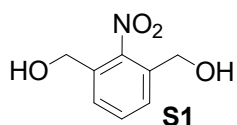

A solution of 2-nitroisophthalic acid 2 (4.22 g, 20.0 mmol, 1.0 equiv.) in anhydrous THF (250 mL) was cooled to 0 °C under N<sub>2</sub> atmosphere, and then borane tetrahydrofuran complex solution (1.0 M in THF, 100 mL, 100 mmol, 5.0 equiv.) was added dropwise over about 1 h. The reaction mixture was allowed to be warmed slowly to room temperature and stirred for another 48 h. Methanol (20 mL) was then added into the reaction system slowly using a syringe. The mixture was filtered, and the filtrate was evaporated with a rotary evaporator. The residue was redissolved in ethyl acetate and

washed with water (3 X 50 mL). The organic layer was dried with anhydrous MgSO<sub>4</sub> overnight before the solvent was removed by a rotary evaporator. The resulting yellow solid was further purified by silica gel chromatography (hexane/ ethyl acetate = 1:1) to obtain 2-nitro-1,3-benzenedimethanol **S1** (3.59 g, 19.6 mmol, 98%) as a white solid.<sup>1</sup>

**<sup>1</sup>H NMR (DMSO-d<sub>6</sub>, 500 MHz, ppm)** δ 7.58 (1H, dd, *J*<sub>1</sub>= 8.8 Hz, *J*<sub>2</sub>= 6.2 Hz), 7.54-7.51 (2H, m), 5.47 (2H, t, *J*= 5.3 Hz) 4.53 (2H, s), 4.52 (2H, s).

The spectral data are in complete agreement with the literature value.<sup>1</sup>

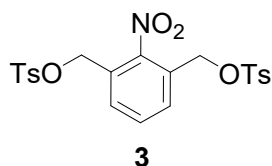

2-Nitro-1,3-benzenedimethanol **S1** (2.75 g, 15.0 mmol, 1.0 equiv.) was dissolved in diethyl ether (80 mL), and tosyl chloride (8.55 g, 44.8 mmol, 3.0 equiv.) was added. The reaction mixture was cooled to 0 °C, and powdered NaOH (1.80 g, 45.0 mmol, 3.0 equiv.) was added in portions under N<sub>2</sub>. The reaction was stirred for 24 h at room temperature. After the reaction was completed, the reaction mixture was filtered for removal of solid remainders.

The residue solution was concentrated under reduced pressure. The residue was washed with diethyl ether (3 X 20 mL), and the desired product **3** was obtained as a white solid in 83% yield (6.14 g, 12.5 mmol).

**<sup>1</sup>H NMR (CDCl<sub>3</sub>, 500 MHz, ppm):** δ 7.76 (4H, d, *J*= 8.3 Hz), 7.60-7.52 (3H, m), 7.34 (4H, d, *J*= 8.0 Hz), 5.12 (4H, s), 2.45 (6H, s)

**<sup>13</sup>C NMR (CDCl<sub>3</sub>, 100 MHz, ppm):** δ 147.6, 145.8, 132.5, 132.4, 130.5, 130.3, 128.6, 128.3, 67.2, 22.0

**IR (cm<sup>-1</sup>):** 3083, 2879, 1597, 1531, 1466, 1353, 1171, 1094, 957, 939, 837, 808, 787, 764, 715, 703, 670, 608, 549, 479

**Melting point:** 128-129 °C

**HRMS (ESI) m/z:** C<sub>22</sub>H<sub>21</sub>NNaO<sub>8</sub>S<sub>2</sub> [M+Na]<sup>+</sup> *calcd*: 514.0601, *found*: 514.0600.

### Monomer 4a

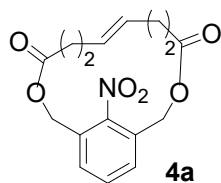

(2-Nitro-1,3-phenylene)bis(methylene) bis(4-methylbenzenesulfonate) **3** (2.00 g, 4.07 mmol, 1.0 equiv.), (E)-oct-4-enedioic acid **DAa** (758 mg, 4.40 mmol, 1.1 equiv.) and triethylamine (1.7 mL, 12.2 mmol, 3.0 equiv.) were dissolved in acetonitrile (400 mL). The reaction mixture was stirred for 24 h at 40 °C. After the reaction was completed, used solvent was removed under the reduced pressure, and the residue was extracted with ethyl acetate (3 X 50 mL). The organic was

dried by anhydrous MgSO<sub>4</sub> and evaporated under the reduced pressure. The residue was purified by column chromatography on silica gel (eluted with hexane/ ethyl acetate = 7:3) to give the white solid **4a** (447 mg, 1.49 mmol, 37%).

**<sup>1</sup>H NMR (CDCl<sub>3</sub>, 500 MHz, ppm):** δ 7.55 (2H, d, *J*= 7.5 Hz), 7.48 (1H, dd, *J*<sub>1</sub>= 8.3 Hz, *J*<sub>2</sub>= 6.9 Hz), 5.15 (4H, s), 5.12 (2H, t, *J*= 3.4 Hz), 2.36-2.30 (4H, m), 2.20-2.16 (4H, m)

**<sup>13</sup>C NMR (CDCl<sub>3</sub>, 125 MHz, ppm):** δ 172.5, 149.7, 133.3, 131.0, 130.3, 129.2, 63.0, 33.7, 27.7

**IR (cm<sup>-1</sup>):** 2930, 1730, 1532, 1437, 1359, 1239, 1142, 965, 778

**Melting point:** 108.5-110 °C

**HRMS (ESI) m/z:** C<sub>16</sub>H<sub>17</sub>NNaO<sub>6</sub> [M+Na]<sup>+</sup> *calcd*: 342.0948, *found*: 342.0948.

## Monomer 4b

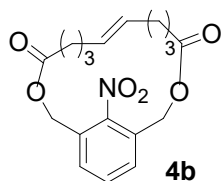

Using the procedure of compound **4a**, a mixture of (2-nitro-1,3-phenylene)bis(methylene) bis(4-methylbenzenesulfonate) **3** (1.47 g, 2.99 mmol, 1.0 equiv.), (E)-dec-5-enedioic acid **DAb** (660 mg, 3.30 mmol, 1.1 equiv.), and triethylamine (1.2 mL, 8.61 mmol, 2.9 equiv.) in acetonitrile (300 mL) was reacted to give the compound **4b** (380 mg, 1.09 mmol, 36%) as a white solid.

**<sup>1</sup>H NMR (CDCl<sub>3</sub>, 500 MHz, ppm):** δ 7.58-7.54 (2H, m), 7.49 (1H, dd, *J*= 8.45, 6.8 Hz), 5.16-5.11 (6H, m), 2.27 (4H, t, *J*=6.6), 1.84 (4H, q, *J*= 6.3 Hz), 1.61 (4H, quint, *J*= 6.7 Hz)

**<sup>13</sup>C NMR (CDCl<sub>3</sub>, 125 MHz, ppm):** δ 173.2, 15.7, 133.2, 131.1, 130.3, 129.6, 62.3, 32.7, 31.1, 24.2

**IR (cm<sup>-1</sup>):** 2932, 1737, 1536, 1455, 1439, 1364, 1231, 1145, 1100, 1043, 1010, 971, 853, 806, 779

**Melting point:** 81.5-83 °C

**HRMS (ESI) m/z:** C<sub>18</sub>H<sub>21</sub>NNaO<sub>6</sub> [M+Na]<sup>+</sup> *calcd*: 370.1261, *found*: 370.1261.

## (2-Nitro-1,4-phenylene)bis(methylene) bis(4-methylbenzenesulfonate) **6**

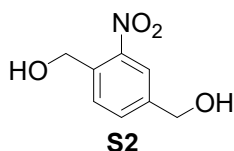

as a white solid.

Using the procedure of 2-nitro-1,3-benzenedimethanol **S1**, commercially available dicarboxylic acid **5** (4.22 g, 20.0 mmol, 1.0 equiv.) and borane tetrahydrofuran complex solution (1.0 M in THF, 100 mL, 100 mmol, 5.0 equiv.) in THF (30 mL) was reacted to give the compound **S2** (3.60 g, 19.7 mmol, 99%)

**<sup>1</sup>H NMR (DMSO-d<sub>6</sub>, 500 MHz, ppm):** δ 7.98 (1H, d, *J*= 1.48 Hz), 7.77 (1H, d, *J*= 7.96 Hz), 7.68 (1H, dd, *J*<sub>1</sub>= 7.98 Hz, *J*<sub>2</sub>= 1.62 Hz), 5.51 (1H, t, *J*= 5.56 Hz), 5.47 (1H, t, *J*= 5.74 Hz), 4.80 (2H, d, *J*= 5.5 Hz), 4.59 (2H, d, *J*= 5.72 Hz).

The spectral data are in complete agreement with the literature value.<sup>2</sup>

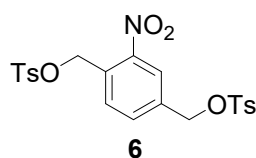

Using the procedure of (2-nitro-1,3-phenylene)bis(methylene) bis(4-methylbenzenesulfonate) **3**, (2-nitro-1,4-phenylene)dimethanol **S2** (3.30 g, 18.0 mmol, 1.0 equiv.), tosyl chloride (10.3 g, 54.0 mmol, 3.0 equiv.) and NaOH (2.16 g, 54.0 mmol, 3.0 equiv.) in diethyl ether (96 mL) was reacted to give the compound **6** (6.19 g, 12.6 mmol, 70%) as a pale yellow solid.

**<sup>1</sup>H NMR (CDCl<sub>3</sub>, 400 MHz, ppm):** δ 7.96 (1H, d, *J*= 1.7 Hz), 7.83 (2H, d, *J*= 8.3 Hz), 7.78 (2H, d, *J*= 8.3 Hz), 7.74 (1H, d, *J*= 8.1 Hz), 7.59 (1H, dd, *J*<sub>1</sub>= 8.1 Hz, *J*<sub>2</sub>= 1.8 Hz), 7.35 (4H, dd, *J*<sub>1</sub>= 11.0 Hz, *J*<sub>2</sub>= 8.0 Hz), 5.42 (2H, s), 5.10 (2H, s), 2.46 (3H, s), 2.45 (3H, s)

**<sup>13</sup>C NMR (CDCl<sub>3</sub>, 100 MHz, ppm):** δ 146.8, 145.8, 135.8, 133.9, 132.9, 132.6, 131.5, 130.4, 130.4, 129.5, 128.3, 128.3, 124.9, 69.7, 68.0, 22.0, 22.0

**IR (cm<sup>-1</sup>):** 1537, 1353, 1172, 1092, 970, 834, 810, 685, 580, 551, 526.

**Melting point:** 107.5-108 °C

**HRMS (ESI) m/z:** C<sub>22</sub>H<sub>21</sub>NNaO<sub>8</sub>S<sub>2</sub> [M+Na]<sup>+</sup> *calcd*: 514.0601, *found*: 514.0600.

### Monomer 7a

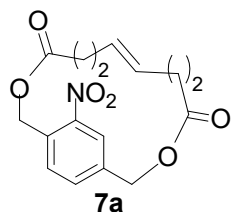

Using the procedure of compound **4a**, a mixture of (2-nitro-1,4-phenylene)bis(methylene) bis(4-methylbenzenesulfonate) **6** (492 mg, 1.00 mmol, 1.0 equiv.), (E)-oct-4-enedioic acid **DAa** (190 mg, 1.10 mmol, 1.1 equiv.), and triethylamine (0.4 mL, 2.9 mmol, 2.9 equiv.) in acetonitrile (100 mL) was reacted to give the compound **7a** (89 mg, 0.28 mmol, 28%) as a white solid.

**<sup>1</sup>H NMR (CDCl<sub>3</sub>, 500 MHz, ppm):** δ 8.03 (1H, s), 7.64 (1H, dd,  $J_1 = 7.8$  Hz,  $J_2 = 1.6$  Hz), 7.57 (1H, d,  $J = 7.8$  Hz), 5.64 (1H, br), 5.26 (1H, br), 5.12 (2H, s), 4.61-4.42 (2H, m), 2.30-1.90 (8H, m)

**<sup>13</sup>C NMR (CDCl<sub>3</sub>, 125 MHz, ppm):** δ 172.6, 172.6, 149.9, 138.8, 134.9, 133.8, 131.8, 128.8, 128.7, 126.7, 65.0, 62.2, 34.4, 34.4, 28.6, 28.6

**IR (cm<sup>-1</sup>):** 2917, 2852, 1731, 1527, 1450, 1360, 1233, 1130, 1058, 1019, 945, 882, 850, 810, 797, 749, 730, 677, 657, 602, 567, 513, 488, 446.

**Melting point:** 146.5-148 °C

**HRMS (ESI) m/z:** C<sub>16</sub>H<sub>17</sub>NNaO<sub>6</sub> [M+Na]<sup>+</sup> *calcd*: 342.0948, *found*: 342.0948.

### Monomer 7b

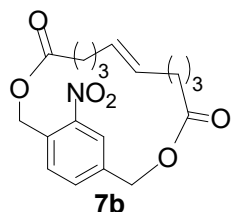

Using the procedure of compound **4a**, a mixture of (2-nitro-1,4-phenylene)bis(methylene) bis(4-methylbenzenesulfonate) **6** (492 mg, 1.00 mmol, 1.0 equiv.), (E)-dec-5-enedioic acid **DAb** (220 mg, 1.10 mmol, 1.1 equiv.), and triethylamine (0.4 mL, 2.9 mmol, 2.9 equiv.) in acetonitrile (100 mL) was reacted to give the compound **7b** (93 mg, 0.27 mmol, 27%) as a white solid.

**<sup>1</sup>H NMR (CDCl<sub>3</sub>, 500 MHz, ppm):** δ 8.05 (1H, d,  $J = 1.7$  Hz), 7.67 (1H, dd,  $J_1 = 7.8$  Hz,  $J_2 = 1.7$  Hz), 7.62 (1H, d,  $J = 7.8$  Hz), 5.49 (2H, s), 5.16 (2H, s), 4.88-4.82 (2H, m), 2.31-2.22 (4H, m), 1.61-1.57 (4H, m), 1.55-1.47 (4H, m)

**<sup>13</sup>C NMR (CDCl<sub>3</sub>, 100 MHz, ppm):** δ 173.4, 173.4, 149.3, 138.7, 134.5, 132.9, 131.8, 130.1, 129.8, 126.2, 64.3, 61.8, 33.8, 33.7, 31.9, 31.9, 24.7, 24.7

**IR (cm<sup>-1</sup>):** 2928, 2848, 1726, 1525, 1417, 1342, 1234, 1131, 989, 962, 912, 882, 869, 846, 815, 800, 768, 756, 705, 664, 569, 554, 499, 405.

**Melting point:** 90.5-93 °C

**HRMS (ESI) m/z:** C<sub>18</sub>H<sub>21</sub>NNaO<sub>6</sub> [M+Na]<sup>+</sup> *calcd*: 370.1261, *found*: 370.1261.

### 1,2-Bis(chloromethyl)-3-nitrobenzene 9

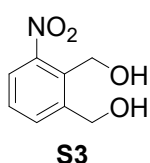

Using the procedure of 2-nitro-1,3-benzenedimethanol **S1**, commercially available dicarboxylic acid **8** (4.22 g, 20.0 mmol, 1.0 equiv.) and borane tetrahydrofuran complex solution (1.0 M in THF, 100 mL, 100 mmol, 5.0 equiv.) in THF (30 mL) was reacted to give the compound **S3** (2.64 g, 14.4 mmol, 72%) as a brown solid.

**<sup>1</sup>H NMR (DMSO-d<sub>6</sub>, 500 MHz, ppm):** δ 7.72 (1H, d, *J* = 7.6 Hz), 7.67 (1H, d, *J* = 8.0 Hz), 7.48 (1H, d, *J* = 7.9 Hz), 5.39 (1H, t, *J* = 5.3 Hz), 5.22 (1H, t, *J* = 5.4 Hz), 4.68 (2H, d, *J* = 4.8 Hz), 4.63 (2H, d, *J* = 5.2 Hz).

The spectral data are in complete agreement with the literature value.<sup>3</sup>

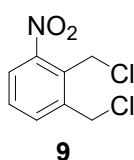

According to the literature,<sup>4</sup> 3-nitrobenzene-1,2-dimethanol **S3** (0.915 g, 5 mmol, 1 equiv.) and DMF (0.5 mL, 6.5 mmol, 1.3 equiv.) were dissolved in DCM (25 mL). SOCl<sub>2</sub> (1 mL, 13 mmol, 2.6 eq) was added to the reaction solution over 15 h at room temperature. After the reaction was completed, the solvent and excess SOCl<sub>2</sub> were removed under reduced pressure. The residue was extracted with diethyl ether (3 X 50 mL). The organic was washed with water (50 mL) and dried by anhydrous MgSO<sub>4</sub>. The resulting solution was concentrated by reduced pressure, and the residue was purified by column chromatography on silica gel (eluted with hexane/ ethyl acetate = 8:2) to give the pale yellow solid **9** (1.00 g, 4.54 mmol, 90.8%).

**<sup>1</sup>H NMR (CDCl<sub>3</sub>, 500 MHz, ppm)** δ 7.89 (1H, dd, *J*<sub>1</sub> = 8.2 Hz, *J*<sub>2</sub> = 1.2 Hz), 7.68 (1H, dd, *J*<sub>1</sub> = 7.7 Hz, *J*<sub>2</sub> = 1.2 Hz), 7.52 (1H, t, *J* = 7.9 Hz), 4.96 (2H, s), 4.8 (2H, s).

**<sup>13</sup>C NMR (CDCl<sub>3</sub>, 125 MHz, ppm):** δ 150.2, 139.2, 135.1, 130.5, 130, 125.3, 42.3, 36.5

**IR (cm<sup>-1</sup>):** 3090, 2882, 1528, 1464, 1440, 1349, 1271, 1254, 1213, 1191, 908, 871, 834, 819, 785, 760, 741, 696, 678, 643, 594.

**HRMS (EI) m/z: C<sub>8</sub>H<sub>7</sub>Cl<sub>2</sub>NO<sub>2</sub> [M]<sup>+</sup> calcd: 218.9854, found: 218.9850**

### Monomer 10a

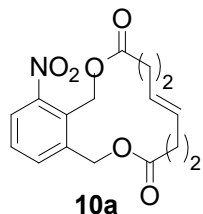

Using the procedure of compound **4a**, a mixture of 1,2-bis(chloromethyl)-3-nitrobenzene **9** (492 mg, 1.00 mmol, 1.0 equiv.), (E)-oct-4-enedioic acid **DAa** (190 mg, 1.10 mmol, 1.1 equiv.), and triethylamine (0.4 mL, 2.9 mmol, 2.9 equiv.) in acetonitrile (100 mL) was reacted to give the compound **10a** (130 mg, 0.41 mmol, 41%) as a white solid.

**<sup>1</sup>H NMR (CDCl<sub>3</sub>, 500 MHz, ppm):** δ 7.85 (1H, dd, *J*<sub>1</sub> = 8.1 Hz, *J*<sub>2</sub> = 1.3 Hz), 7.67 (1H, dd, *J*<sub>1</sub> = 7.7 Hz, *J*<sub>2</sub> = 1.2 Hz), 7.52 (1H, t, *J* = 7.9 Hz), 5.45-5.26 (4H, m), 5.20 (2H, s), 2.42-2.35 (4H, m), 2.28-2.19 (4H, m)

**<sup>13</sup>C NMR (CDCl<sub>3</sub>, 100 MHz, ppm):** δ 173.2, 172.7, 151.6, 137.4, 136.3, 130.2, 130.1, 129.9, 129.2, 125.4, 64.6, 59.3, 35.2, 34.5, 27.9, 27.8

**IR (cm<sup>-1</sup>):** 2918, 2849, 1721, 1529, 1459, 1438, 1340, 1304, 1243, 1134, 1075, 1013, 984, 960, 927, 892, 855, 822, 793, 744, 654.

**Melting point:** 142.5-144.5 °C

**HRMS (ESI) m/z: C<sub>16</sub>H<sub>17</sub>NNaO<sub>6</sub> [M+Na]<sup>+</sup> calcd: 342.0948, found: 342.0950**



### Monomer 10b

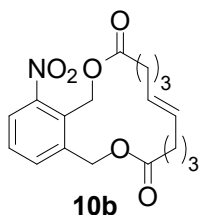

Using the procedure of compound **4a**, a mixture of 1,2-bis(chloromethyl)-3-nitrobenzene **9** (492 mg, 1.00 mmol, 1.0 equiv.), (E)-dec-5-enedioic acid **DAb** (220 mg, 1.10 mmol, 1.1 equiv.) and triethylamine (0.4 mL, 2.9 mmol, 2.9 equiv.) in acetonitrile (100 mL) was reacted to give the compound **10b** (170 mg, 0.49 mmol, 49%) as a white solid.

**<sup>1</sup>H NMR (CDCl<sub>3</sub>, 500 MHz, ppm):** δ 7.84 (1H, dd,  $J_1=8.1$  Hz,  $J_2=1.2$  Hz), 7.67 (1H, dd,  $J_1=7.7$  Hz,  $J_2=1.2$  Hz), 7.5 (1H, t,  $J=7.9$  Hz), 5.35 (2H, s), 5.27-5.23 (2H, m), 5.20 (2H, s), 2.32 (4H, t,  $J=7.1$  Hz), 2.07-1.96 (4H, m), 1.78-1.68 (4H, m)

**<sup>13</sup>C NMR (CDCl<sub>3</sub>, 100 MHz, ppm):** δ 173.5, 173.3, 151.7, 137.9, 135.5, 131.2, 131.1, 129.9, 129.4, 125.2, 64.2, 59.2, 32.7, 32.2, 31.8, 31.3, 23.8, 22.7

**IR (cm<sup>-1</sup>):** 2926, 2850, 1727, 1526, 1473, 1448, 1429, 1414, 1389, 1350, 1326, 1307, 1218, 1204, 1183, 1155, 1136, 1064, 1054, 1024, 996, 974, 955, 894, 883, 867, 819, 808, 792, 751, 661, 608.

**Melting point:** 85-87 °C

**HRMS (ESI) m/z:** C<sub>18</sub>H<sub>21</sub>NNaO<sub>6</sub> [M+Na]<sup>+</sup> *calcd*: 370.1261, *found*: 370.1261

### (E)-Oct-4-enedioic acid DAa

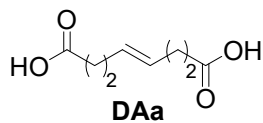

According to the literature,<sup>5</sup> a solution of 4-pentenoic acid (0.98 ml, 10 mmol, 1.00 equiv.) in dry toluene (10 mL) was added to Grubbs 2<sup>nd</sup> generation **G2** (43 mg, 0.05 mmol, 0.05 equiv). The reaction mixture was stirred for 20 h at room temperature. After the reaction was completed, the solvent was removed and recrystallized from 30% ethyl acetate in hexanes. The desired product **DAa** was obtained as a light purple solid in 46% yield (0.39 g, 2.3 mmol).

**<sup>1</sup>H NMR (DMSO-d<sub>6</sub>, 500 MHz, ppm):** δ 12.0 (2H, br), 5.48-5.39 (2H, m), 2.26-2.22 (4H, m), 2.19-2.14 (4H, m)

The spectral data are in complete agreement with the literature value.<sup>5</sup>

### (E)-Dec-5-enedioic acid DAb

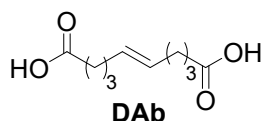

Using the procedure of (E)-oct-4-enedioic acid **DAa**, 5-hexenoic acid (1.2 ml, 10 mmol, 1 equiv.) and **G2** (43 mg, 0.05 mmol, 0.05 equiv) in dry toluene (10 mL) was reacted to give the compound **DAb** (0.28 g, 1.4 mmol, 28%) as a purple solid.

**<sup>1</sup>H NMR (DMSO-d<sub>6</sub>, 500 MHz, ppm):** δ 12.0 (2H, br), 5.39-5.36 (2H, m), 2.18 (4H, t,  $J=7.4$  Hz), 1.98-1.94 (4H, m), 1.54 (4H, quin,  $J=7.4$  Hz).

The spectral data are in complete agreement with the literature value.<sup>6</sup>

### 3. Polymerization

#### General procedure

A solution of monomer (0.025 mmol) in DCM (0.25 mL) was added into the Grubbs catalyst. The resulting solution was stirred at room temperature for 30 minutes. The reaction was quenched with ethyl vinyl ether (0.1 mL) and stirred for an additional 10 minutes at room temperature. The polymer was precipitated upon addition of methanol, and the polymer was isolated by centrifugation and decantation. The obtained polymer was dried under high vacuum. For the GPC analysis, the isolated polymer was diluted with THF (8 mg/mL), filtered, and then injected to GPC instrument.

**Table S1.** Optimization of ROMP in the presence of **G2** 10 mol%

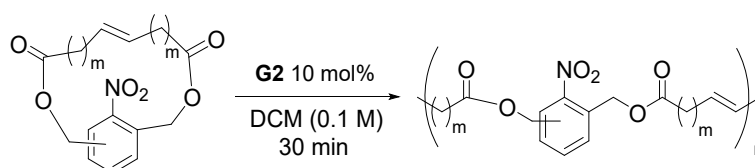

| Entry | monomer   | Temp (°C) | Yield (%) <sup>a</sup> |
|-------|-----------|-----------|------------------------|
| 1     | <b>4a</b> | rt        | 23                     |
| 2     | <b>4a</b> | 40        | 92                     |
| 3     | <b>4b</b> | rt        | 99                     |
| 4     | <b>4b</b> | 40        | 99                     |
| 5     | <b>7a</b> | rt        | 67                     |
| 6     | <b>7a</b> | 40        | 85                     |
| 7     | <b>7b</b> | rt        | 99                     |
| 8     | <b>7b</b> | 40        | 99                     |

<sup>a</sup> Yields were determined by crude <sup>1</sup>H NMR using 1,3,5-trimethoxybenzene as an internal standard.

**Table S2.** Optimization of ROMP

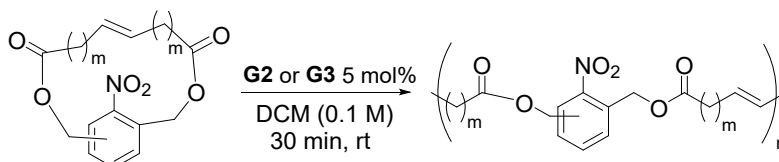

| Entry           | monomer    | Catalyst  | Yield (%) <sup>a</sup> | $M_n^{\text{exp}}$ (KDa) <sup>b</sup> | $\mathcal{D}$ <sup>b</sup> |
|-----------------|------------|-----------|------------------------|---------------------------------------|----------------------------|
| 1               | <b>4a</b>  | <b>G2</b> | -                      | -                                     | -                          |
| 2               | <b>4a</b>  | <b>G3</b> | -                      | -                                     | -                          |
| 3 <sup>c</sup>  | <b>4a</b>  | <b>G2</b> | 54                     | 5.98                                  | 1.28                       |
| 4 <sup>c</sup>  | <b>4a</b>  | <b>G3</b> | 53                     | 6.63                                  | 1.28                       |
| 3               | <b>4b</b>  | <b>G2</b> | >95                    | 18.5                                  | 1.41                       |
| 4               | <b>4b</b>  | <b>G3</b> | >95                    | 9.4                                   | 1.47                       |
| 5               | <b>7a</b>  | <b>G2</b> | -                      | -                                     | -                          |
| 6               | <b>7a</b>  | <b>G3</b> | -                      | -                                     | -                          |
| 7 <sup>c</sup>  | <b>7a</b>  | <b>G2</b> | 21                     | - <sup>d</sup>                        | - <sup>d</sup>             |
| 8 <sup>c</sup>  | <b>7a</b>  | <b>G3</b> | 31                     | - <sup>d</sup>                        | - <sup>d</sup>             |
| 9               | <b>7b</b>  | <b>G2</b> | 77                     | 16.3                                  | 1.45                       |
| 10              | <b>7b</b>  | <b>G3</b> | 90                     | 9.1                                   | 1.54                       |
| 11              | <b>10a</b> | <b>G2</b> | 74                     | 9.0                                   | 1.38                       |
| 12              | <b>10b</b> | <b>G2</b> | 81                     | 9.3                                   | 1.51                       |
| 13 <sup>e</sup> | <b>4b</b>  | <b>G2</b> | >95                    | 15.9                                  | 1.53                       |
| 14 <sup>f</sup> | <b>4b</b>  | <b>G2</b> | >95                    | 18.2                                  | 1.51                       |

<sup>a</sup> Yields were determined by crude <sup>1</sup>H NMR using 1,3,5-trimethoxybenzene as an internal standard. <sup>b</sup>  $M_n^{\text{exp}}$ 's and  $\mathcal{D}$ 's were determined by GPC (THF) using polystyrene standards (RI detection). <sup>c</sup> Reaction was carried out at 40 °C for 24 h. <sup>d</sup> Polymer was not isolated. <sup>e</sup> Using 2 mol% catalyst. <sup>f</sup> Using 1 mol% catalyst.

**Table S3.** GPC plot of polymer **4bP** at room temperature for 30 min in 0.1 M DCM.

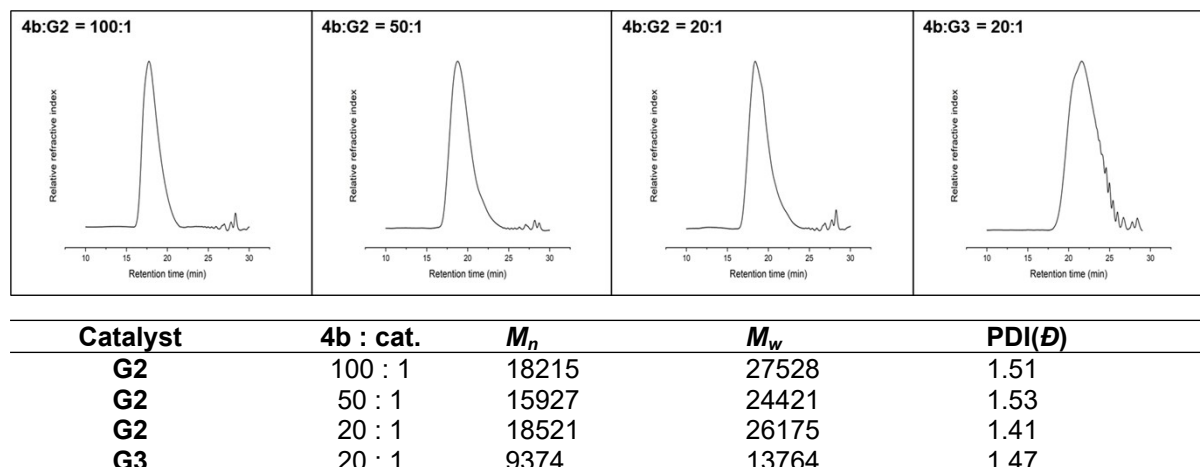

**Table S4.** GPC plot of polymer **7bP** at room temperature for 30 min in 0.1 M DCM.

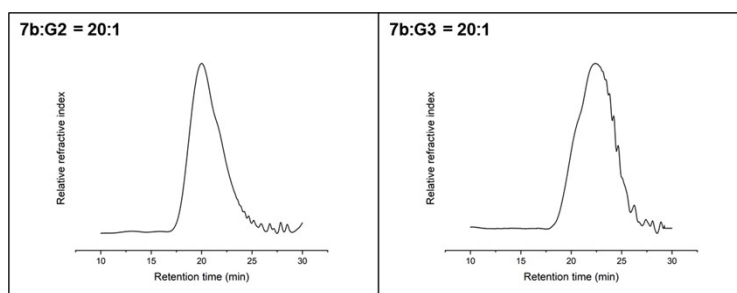

| Catalyst | 7b : cat. | $M_n$ | $M_w$ | PDI( $\bar{D}$ ) |
|----------|-----------|-------|-------|------------------|
| G2       | 20 : 1    | 16346 | 23650 | 1.45             |
| G3       | 20 : 1    | 9091  | 14012 | 1.54             |

**Table S5.** GPC plot of polymers **10aP** and **10bP** at room temperature for 30 min in 0.1 M DCM.

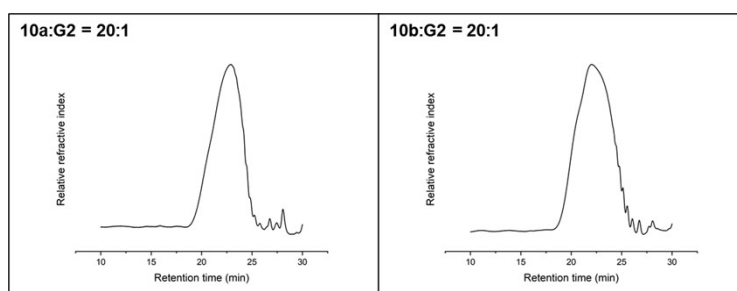

| Catalyst | 10 : cat.           | $M_n$ | $M_w$ | PDI( $\bar{D}$ ) |
|----------|---------------------|-------|-------|------------------|
| G2       | 20 <sup>a</sup> : 1 | 9028  | 12429 | 1.38             |
| G2       | 20 <sup>b</sup> : 1 | 9301  | 14007 | 1.51             |

a. 10a b. 10b monomer.

**Table S6.** GPC plot of polymer **4aP** at 40 °C for 24 h in 0.1 M DCM.

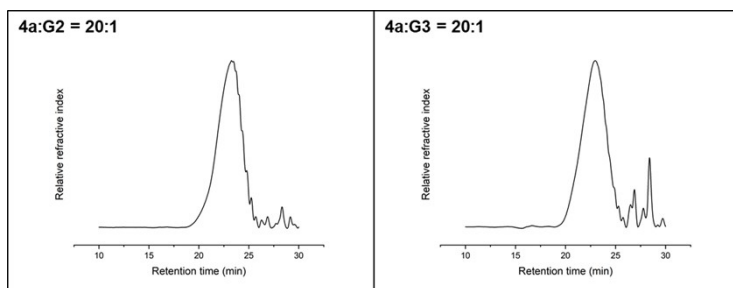

| Catalyst | 4a : cat. | $M_n$ | $M_w$ | PDI( $\bar{D}$ ) |
|----------|-----------|-------|-------|------------------|
| G2       | 20 : 1    | 5975  | 7668  | 1.28             |
| G3       | 20 : 1    | 6627  | 8488  | 1.28             |

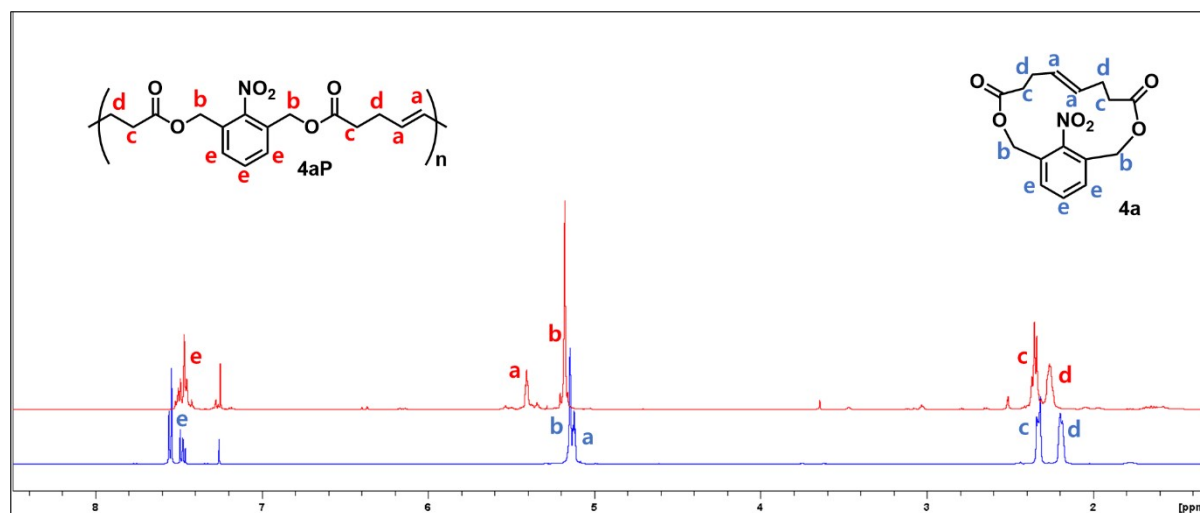

**Fig. S1.**  $^1\text{H}$  NMR (500 MHz,  $\text{CDCl}_3$ ) spectrum of polymer **4aP** (red line) and monomer **4a** (blue line).

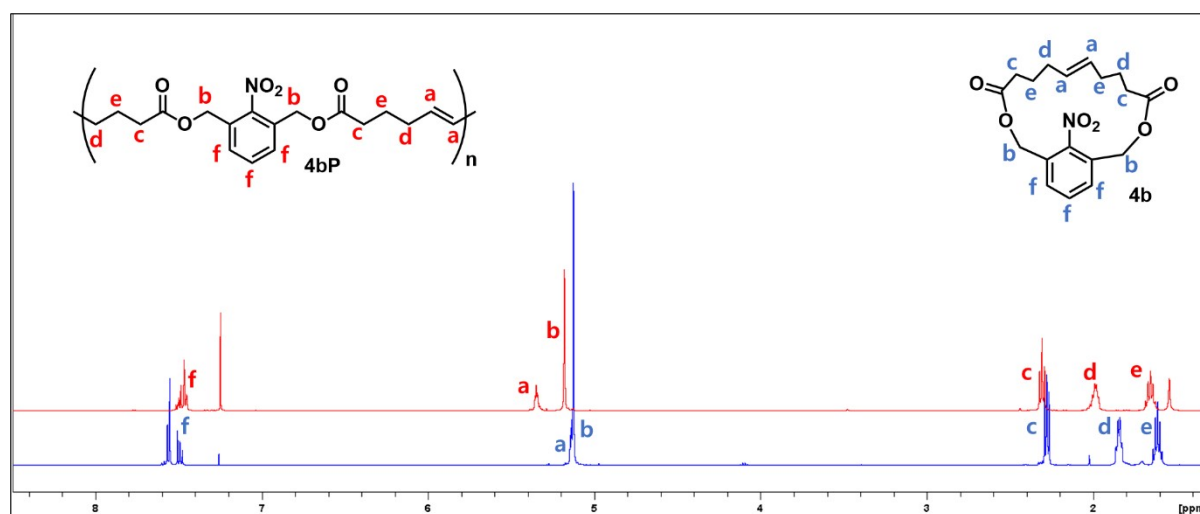

**Fig. S2.**  $^1\text{H}$  NMR (500 MHz,  $\text{CDCl}_3$ ) spectrum of polymer **4bP** (red line) and monomer **4b** (blue line).

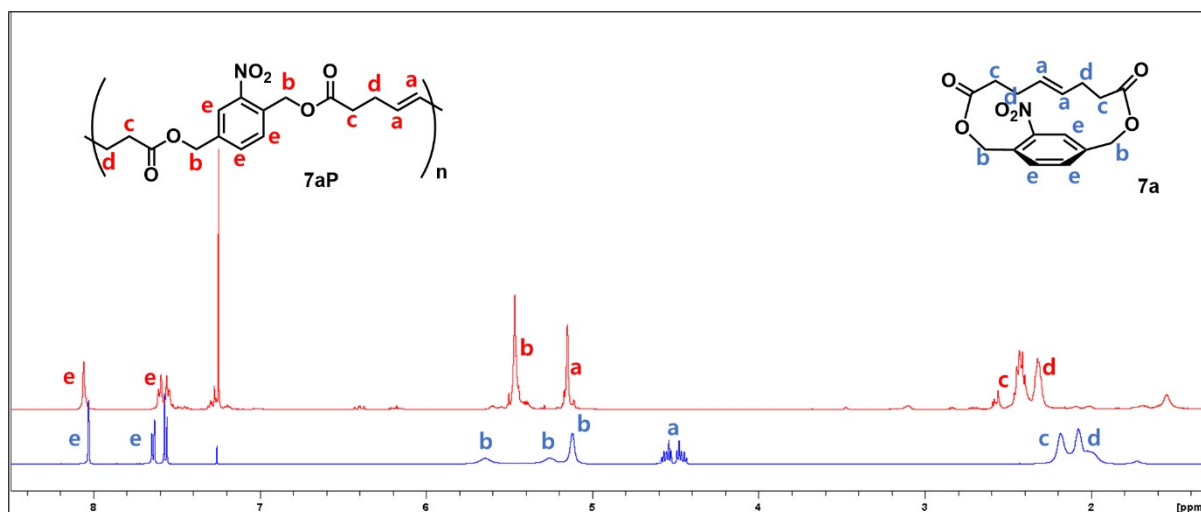

**Fig. S3.**  $^1\text{H}$  NMR (500 MHz,  $\text{CDCl}_3$ ) spectrum of polymer **7aP** (red line) and monomer **7a** (blue line).

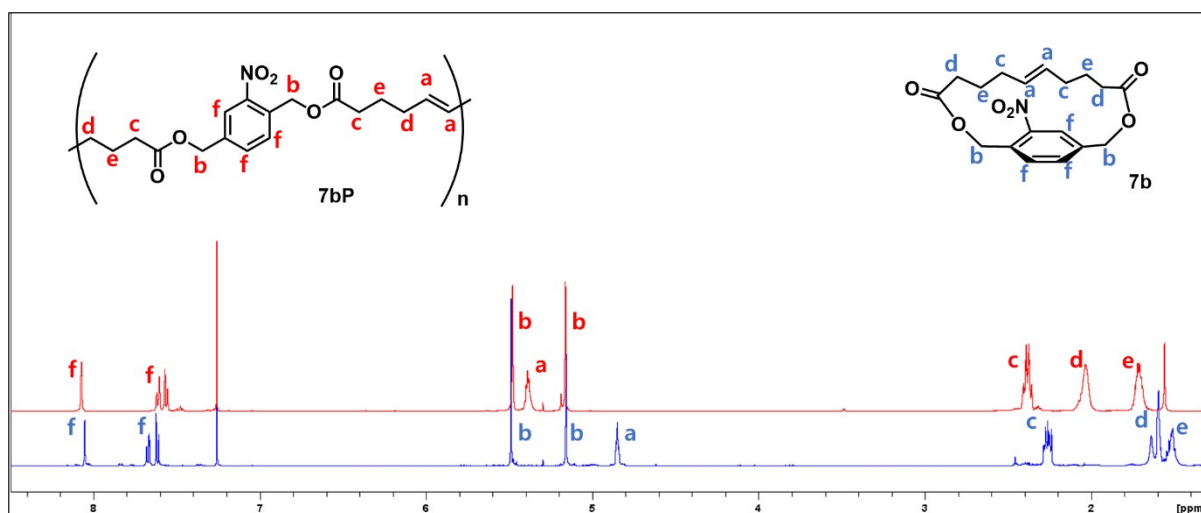

**Fig. S4.**  $^1\text{H}$  NMR (500 MHz,  $\text{CDCl}_3$ ) spectrum of polymer **7bP** (red line) and monomer **7b** (blue line).

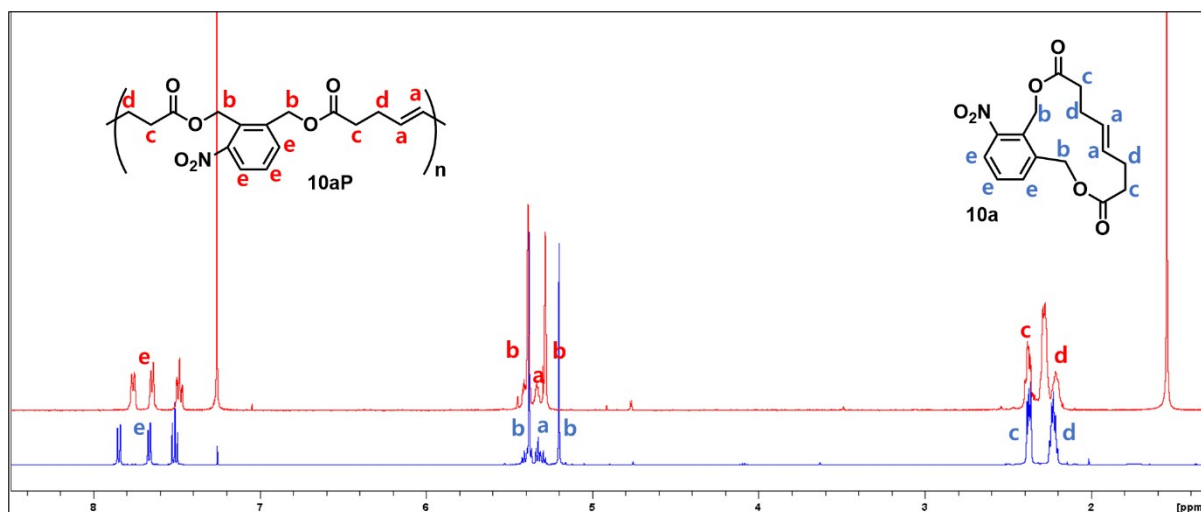

**Fig. S5.**  $^1\text{H}$  NMR (500 MHz,  $\text{CDCl}_3$ ) spectrum of polymer **10aP** (red line) and monomer **10a** (blue line).

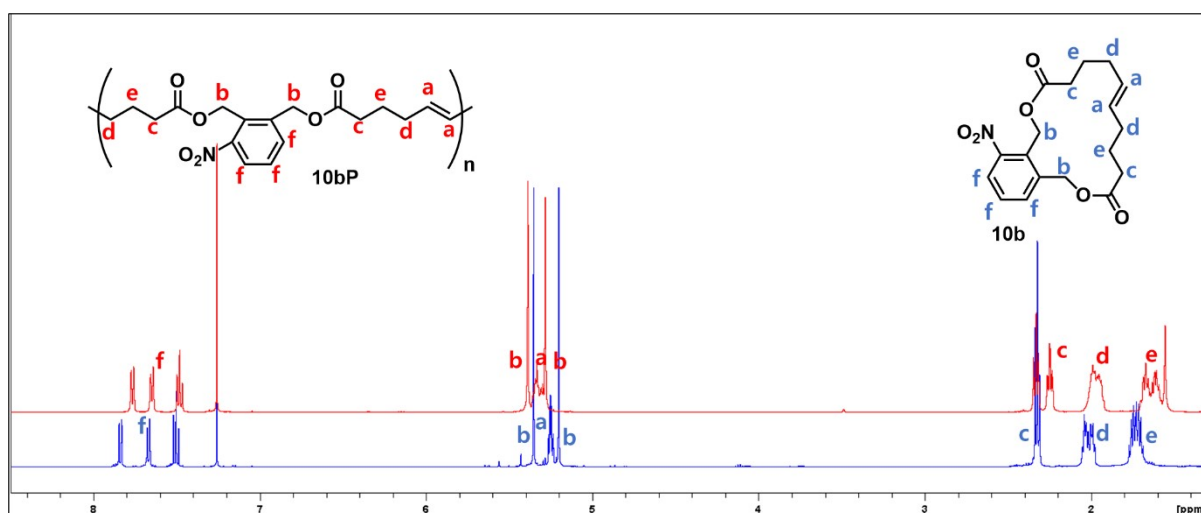

**Fig. S6.**  $^1\text{H}$  NMR (500 MHz,  $\text{CDCl}_3$ ) spectrum of polymer **10bP** (red line) and monomer **10b** (blue line).

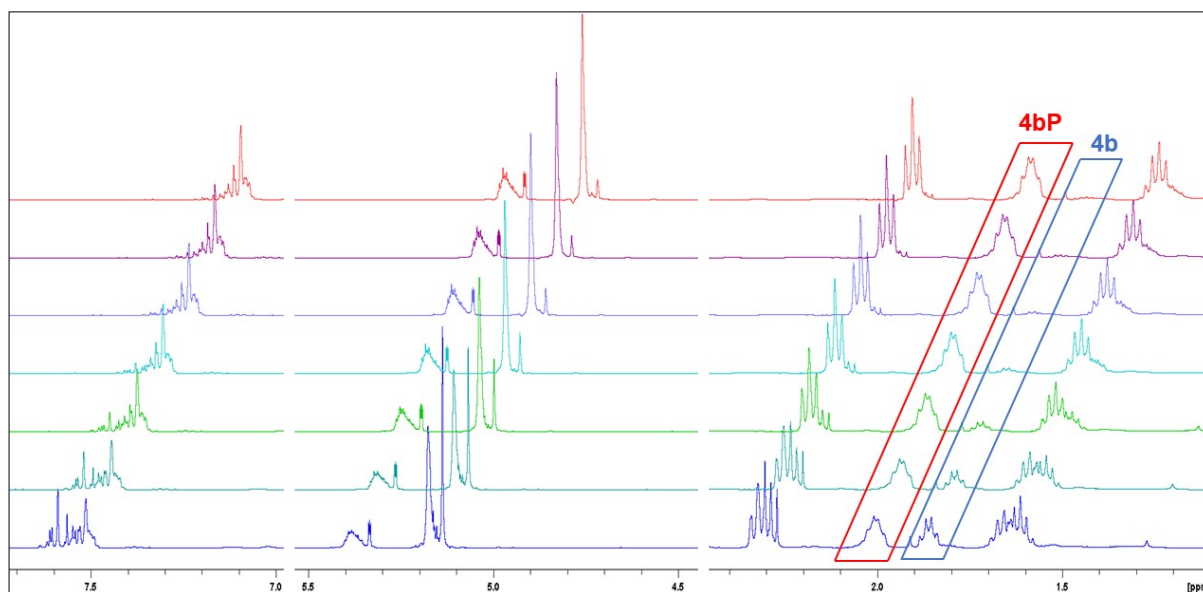

**Fig. S7.** (a) Polymerization of **4b**: 5.5 min, 7 min, 12 min, 17 min, 22 min, 27 min, 30 min (in  $\text{CD}_2\text{Cl}_2$ ). (b) Plot of

**Table S7.** Monomer (**4b**) and Polymer (**4bP**) Ratio Comparison.

| time (min) | Monomer <b>4b</b> | Polymer <b>4bP</b> | Conversion(%) |
|------------|-------------------|--------------------|---------------|
| 5.5        | 1.59              | 2.37               | 59.9          |
| 5.38       | 1.44              | 2.45               | 62.9          |
| 6          | 1.43              | 2.55               | 64.1          |
| 6.15       | 1.31              | 2.61               | 66.5          |
| 7          | 1.19              | 2.74               | 69.7          |
| 8          | 1.04              | 2.90               | 73.5          |
| 9          | 0.91              | 3.03               | 77.0          |
| 10         | 0.81              | 3.16               | 79.6          |
| 11         | 0.71              | 3.25               | 82.1          |
| 12         | 0.66              | 3.34               | 83.5          |
| 13         | 0.56              | 3.41               | 85.9          |
| 14         | 0.50              | 3.49               | 87.5          |
| 15         | 0.45              | 3.53               | 88.7          |
| 16         | 0.41              | 3.58               | 89.8          |
| 17         | 0.39              | 3.64               | 90.2          |
| 18         | 0.35              | 3.69               | 91.3          |
| 19         | 0.32              | 3.70               | 92.0          |
| 20         | 0.31              | 3.73               | 92.4          |
| 21         | 0.29              | 3.74               | 92.9          |
| 22         | 0.27              | 3.75               | 93.3          |
| 23         | 0.26              | 3.79               | 93.5          |
| 24         | 0.25              | 3.75               | 93.9          |
| 25         | 0.24              | 3.78               | 94.1          |
| 26         | 0.23              | 3.77               | 94.3          |
| 27         | 0.22              | 3.79               | 94.5          |
| 28         | 0.21              | 3.79               | 94.7          |
| 29         | 0.21              | 3.80               | 94.7          |
| 30         | 0.21              | 3.81               | 94.8          |

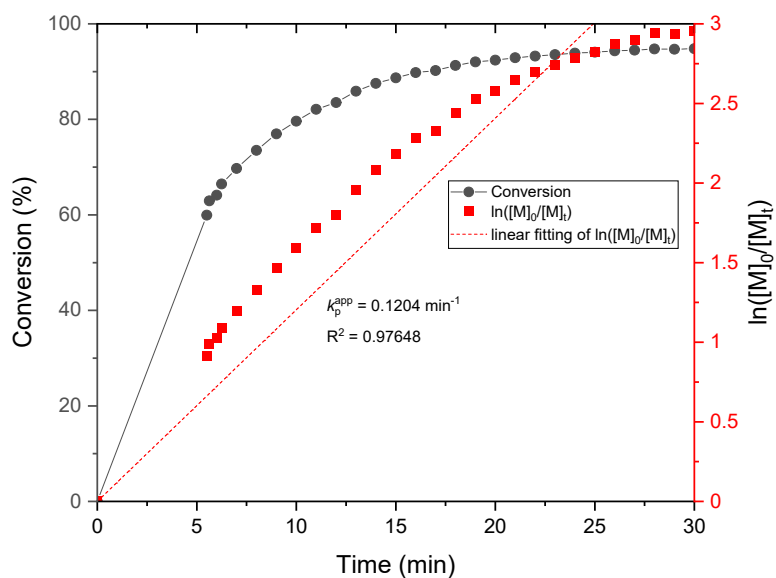

**Fig. S8.** Plots of conversion and  $\ln([4b]_0/[4b]_t)$  over a length of time in polymerization of monomer **4b**.

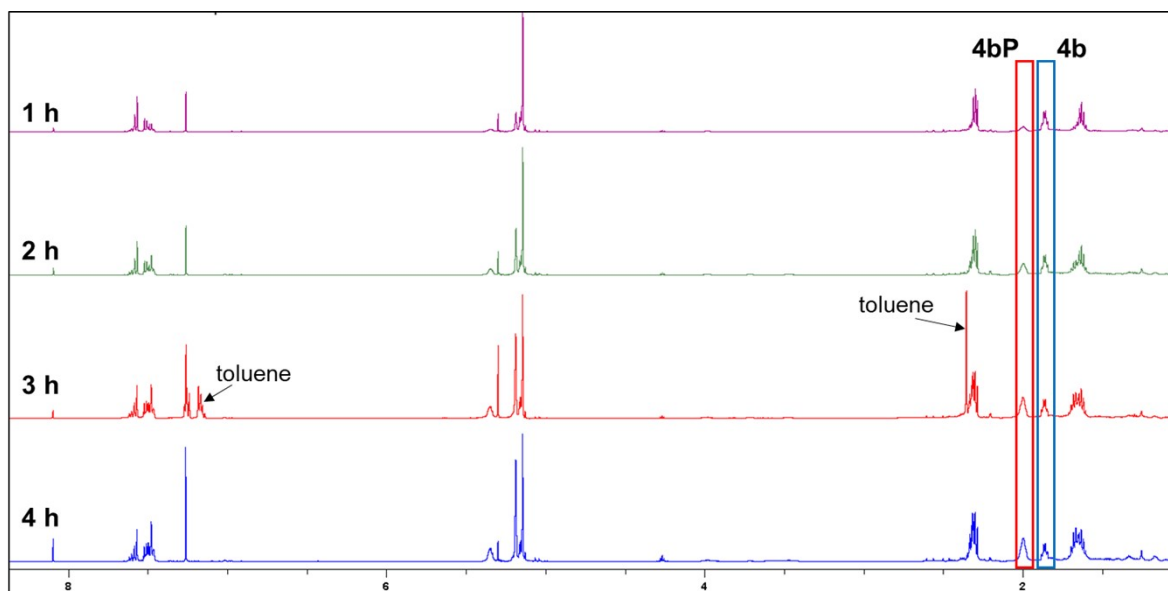

| Reaction time (h) | Calculated conversion (%) |
|-------------------|---------------------------|
| 1                 | 30.4                      |
| 2                 | 47.7                      |
| 3                 | 61.5                      |
| 4                 | 66.3                      |

**Fig. S9.** Crude  $^1\text{H}$  NMR of ROMP of **4b** with 5 mol % **G2** at  $0\text{ }^\circ\text{C}$  and calculated conversions in 0.1 M DCM.



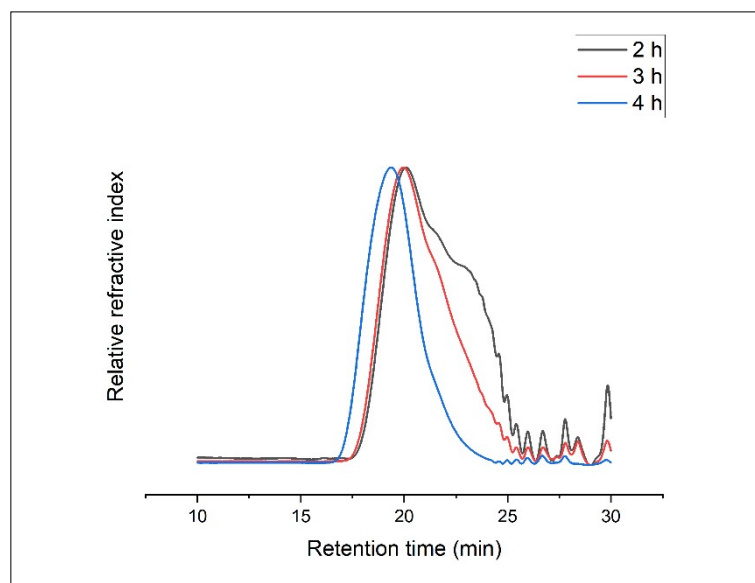

| Reaction time (h) | $M_n$ (kDa) | $M_w$ (kDa) | $\bar{D}$ |
|-------------------|-------------|-------------|-----------|
| 2                 | 11.8        | 19.5        | 1.65      |
| 3                 | 15.3        | 22.9        | 1.50      |
| 4                 | 19.5        | 28.0        | 1.44      |

**Fig. S10.** GPC plot of ROMP of **4b** with 5 mol % **G2** at 0 °C in 0.1 M DCM.

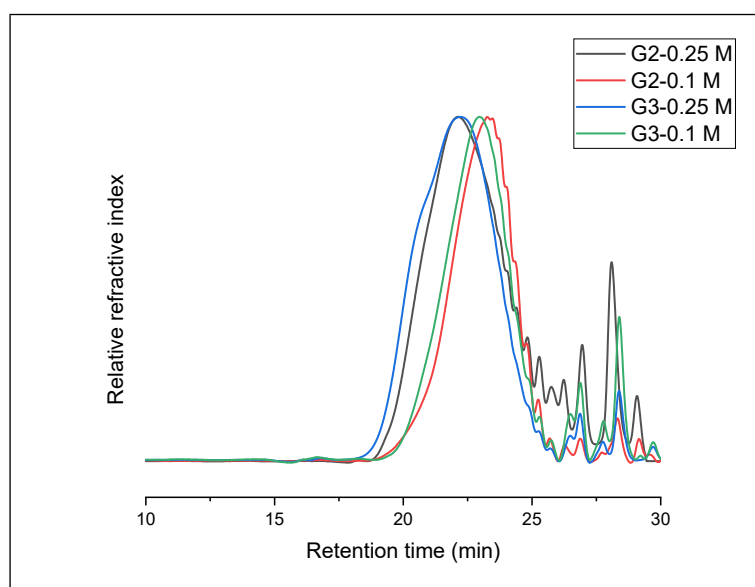

| Catalyst  | Concentration (M) | Conversion (%) | $M_n$ (kDa)  | $M_w$ (kDa) | $\bar{D}$ |
|-----------|-------------------|----------------|--------------|-------------|-----------|
| <b>G2</b> | 0.25              | 64             | 7.66         | 10.3        | 1.35      |
|           | 0.1               | 54             | 5.98         | 7.67        | 1.28      |
|           | 0.05              | 47             | Not isolated |             |           |
| <b>G3</b> | 0.25              | 53             | 8.69         | 12.1        | 1.39      |
|           | 0.1               | 53             | 6.63         | 8.49        | 1.28      |
|           | 0.05              | 41             | Not isolated |             |           |

**Fig. S11.** GPC plot of ROMP of **4a** with 5 mol % catalyst at 40 °C for 24 h in various concentrations with DCM solvent.

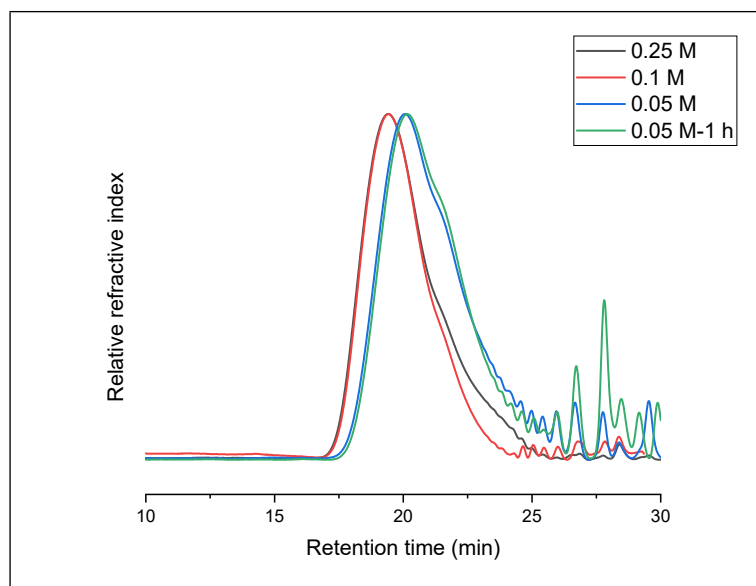

| Concentration (M) | Conversion (%) | $M_n$ (kDa) | $M_w$ (kDa) | $\mathcal{D}$ |
|-------------------|----------------|-------------|-------------|---------------|
| 0.25              | > 95           | 16.7        | 24.4        | 1.46          |
| 0.1               | > 95           | 18.5        | 26.2        | 1.41          |
| 0.05              | > 95           | 13.6        | 20.0        | 1.47          |
| 0.05 (1h)         | > 95           | 13.4        | 19.6        | 1.46          |

**Fig. S12.** GPC plot of ROMP of **4b** with 5 mol % **G2** at room temperature for 30 min in various concentrations with DCM solvent.

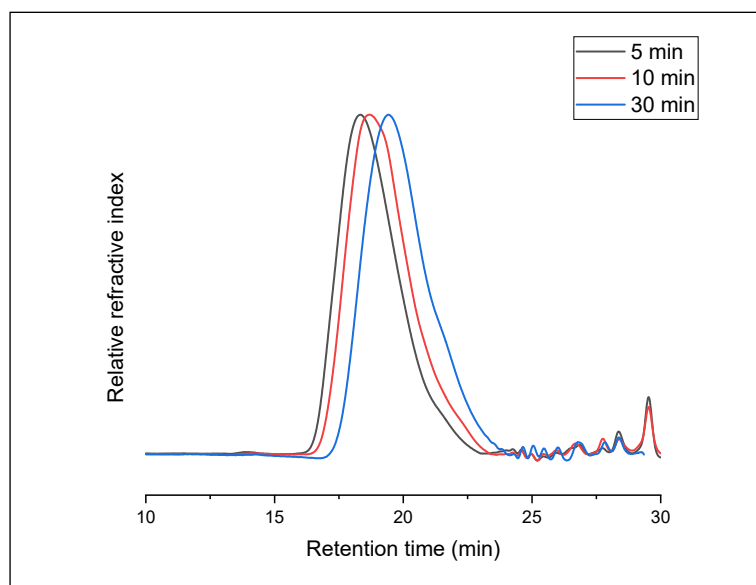

| Reaction time | Conversion (%) | $M_n$ (kDa) | $M_w$ (kDa) | $\mathcal{D}$ |
|---------------|----------------|-------------|-------------|---------------|
| 5 min         | 79             | 19.3        | 29.0        | 1.50          |
| 10 min        | 82             | 18.1        | 27.4        | 1.51          |
| 30 min        | > 95           | 18.5        | 26.2        | 1.41          |

**Fig. S13.** GPC plot of ROMP of **4b** with 5 mol % **G2** at room temperature in 0.1 M DCM.

#### 4. Photodegradations of polymers 4bP and 7bP

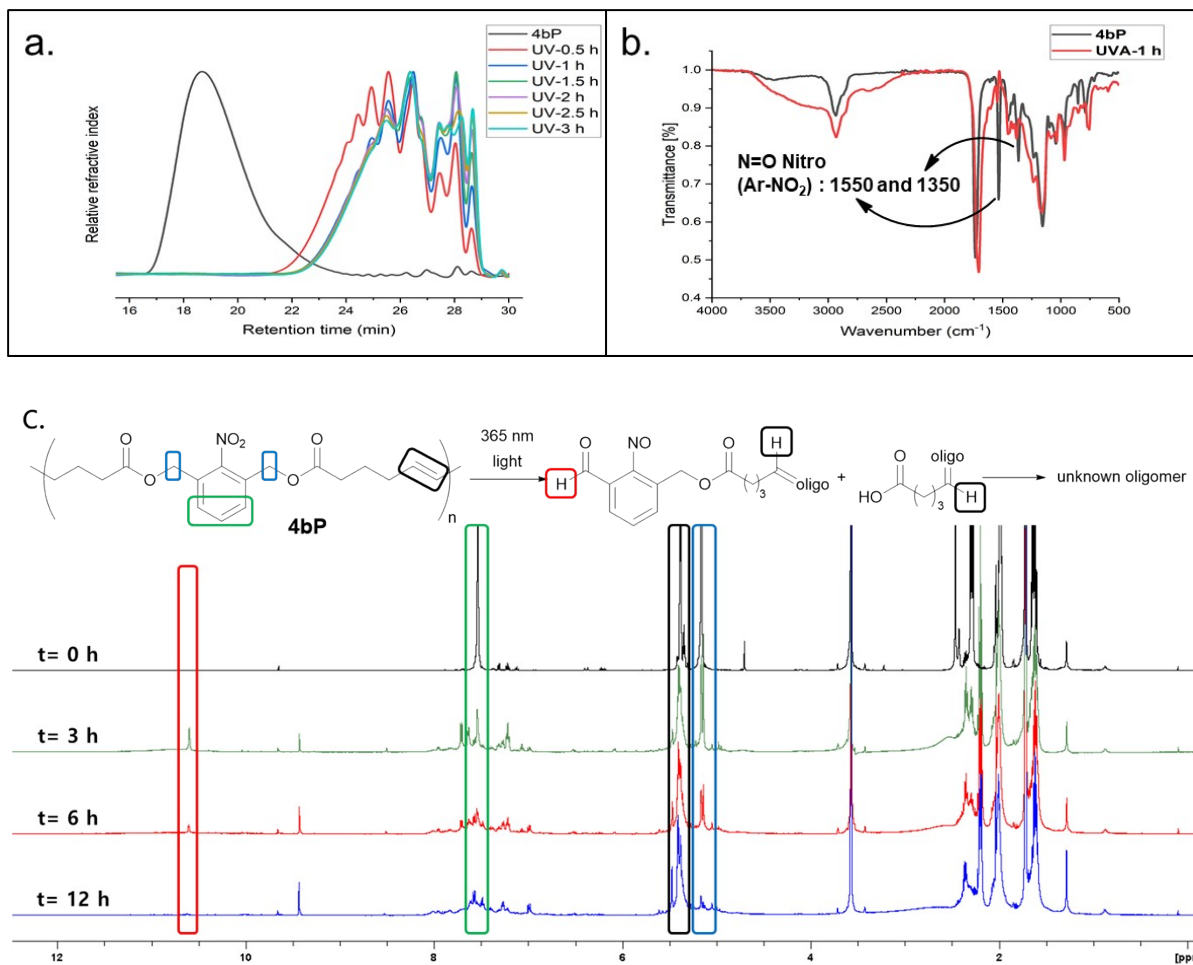

**Fig. S14.** Photodegradation study of polymer **4bP** under UVA light. GPC (a), FT-IR (b), NMR spectra (c) plots of polymer **4bP** and degraded polymer.

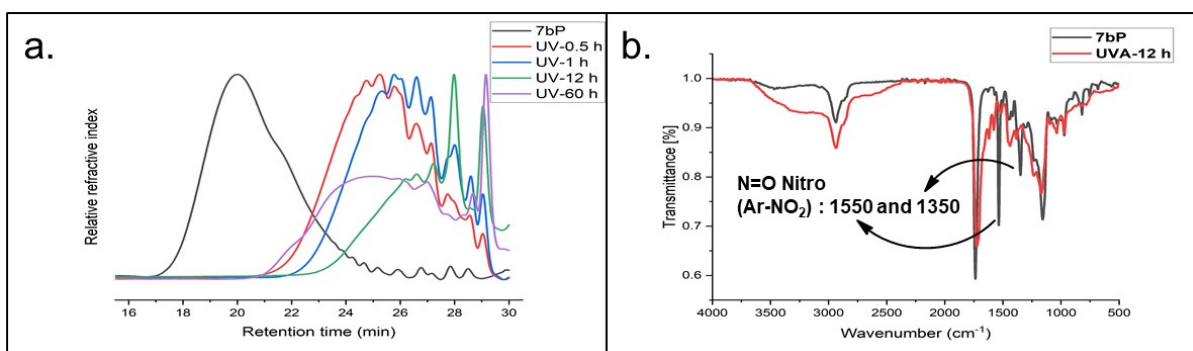

**Fig. S15.** Photodegradation study of polymer **7bP** under UVA light. GPC (a) and FT-IR (b) plots of polymer **7bP** and degraded polymer.

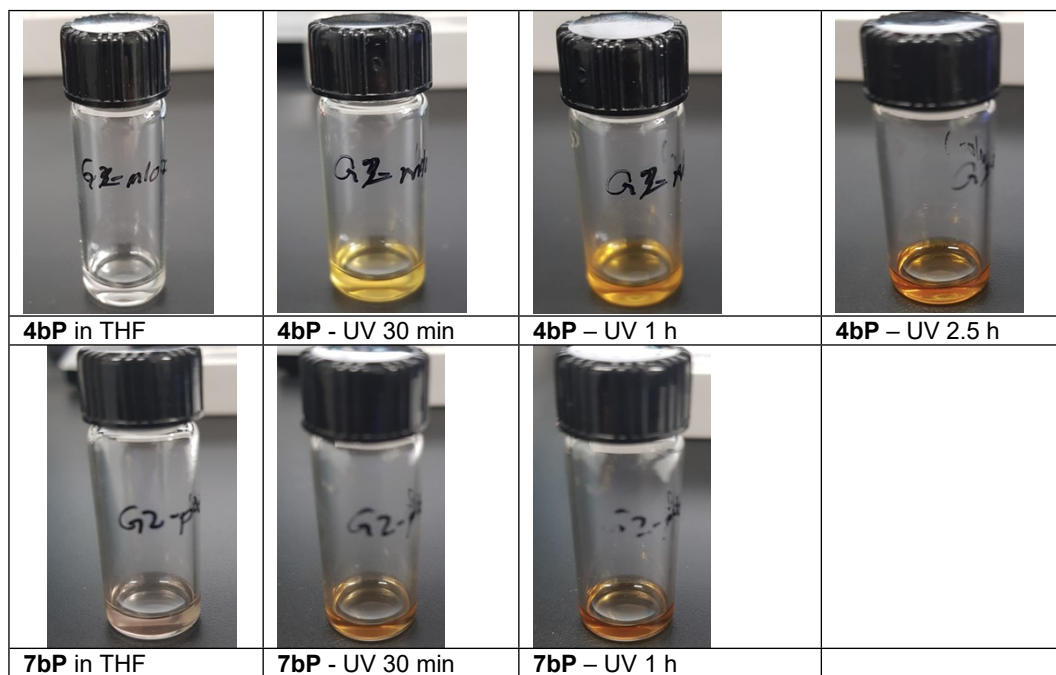

**Fig. S16.** Color changes of **4bP** and **7bP** under UVA light.

## 5. Computational Details

We optimized the geometries of the cyclic molecules at the B3LYP/6-31G(2df,p) level of theory based on the X-ray crystallographic structures. Such experimental structures were not available for linear molecules, and we performed the conformational searches as follows. First, we collected the lowest-energy conformations with the extended tight-binding (XTB) theory<sup>7</sup> using the software CREST.<sup>8</sup> The energy window for the conformational searches was 10.0 kcal/mol. Then, B3LYP/6-31G(2df,p) energies were calculated at all the geometries with the XTB energy within 0.003  $E_h$  from the lowest-energy conformation (except for **7b**, in which we have employed 0.002  $E_h$ ). Finally, we performed free energy calculations for six molecular conformations with each species' lowest B3LYP/6-31G(2df,p) energies. In summary, the free energy calculations were performed at seven geometries (one and six for cyclic and linear molecules, respectively) for each species, resulting in 42 free energy calculations. The linear conformations with the lowest Gibbs free energies were used to compute the  $\Delta G$  reported in Table 3 in the main text. The solvent effect due to the DCM solvent was considered in all DFT calculations using the SCRF theory.<sup>9</sup>

## 6. $^1\text{H}$ NMR and $^{13}\text{C}$ NMR spectra

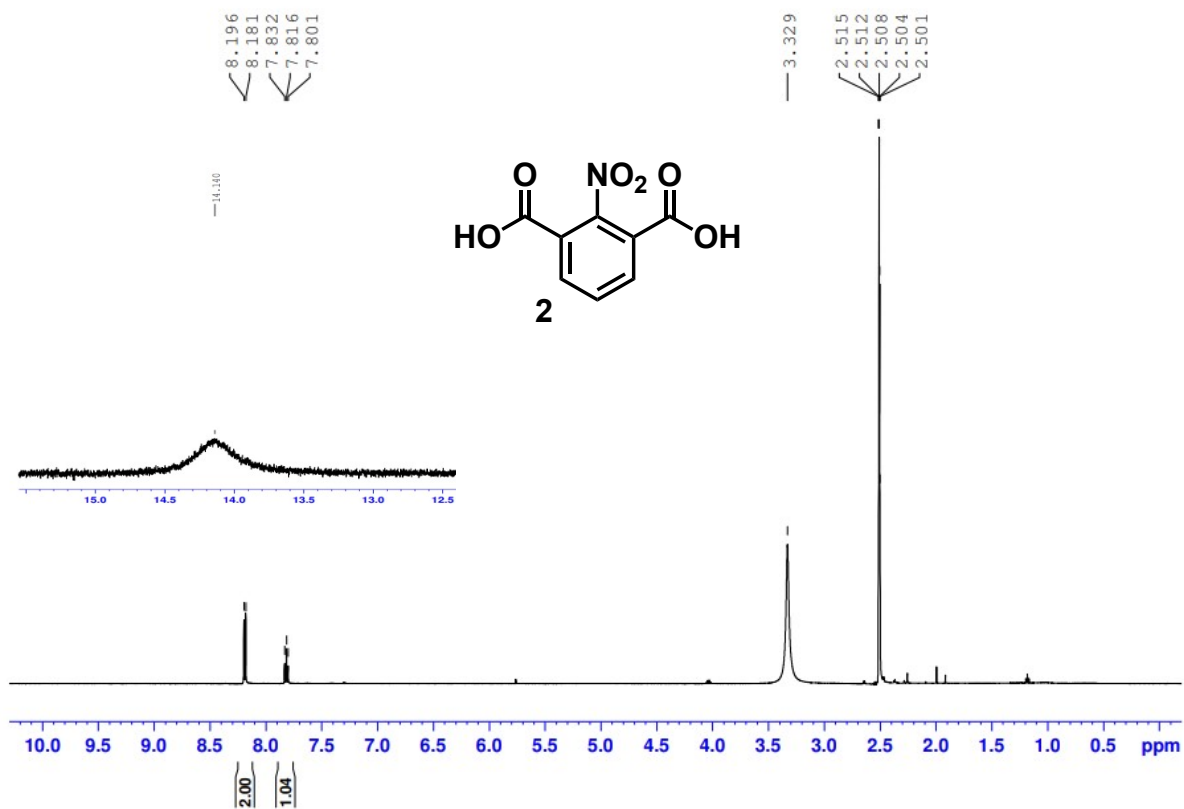

$^1\text{H}$  NMR (DMSO- $d_6$ , 500 MHz) spectra of compound **2**

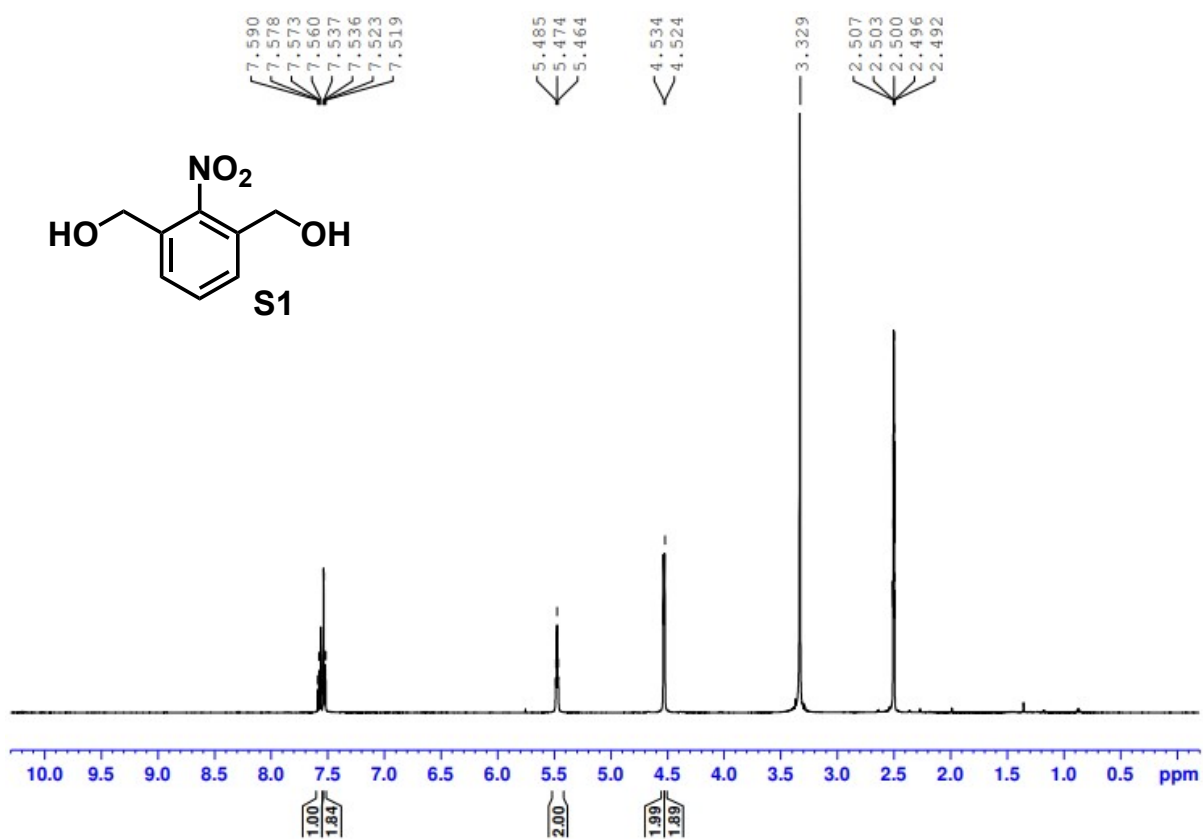

<sup>1</sup>H NMR (DMSO-d<sub>6</sub>, 500 MHz) spectra of compound **S1**

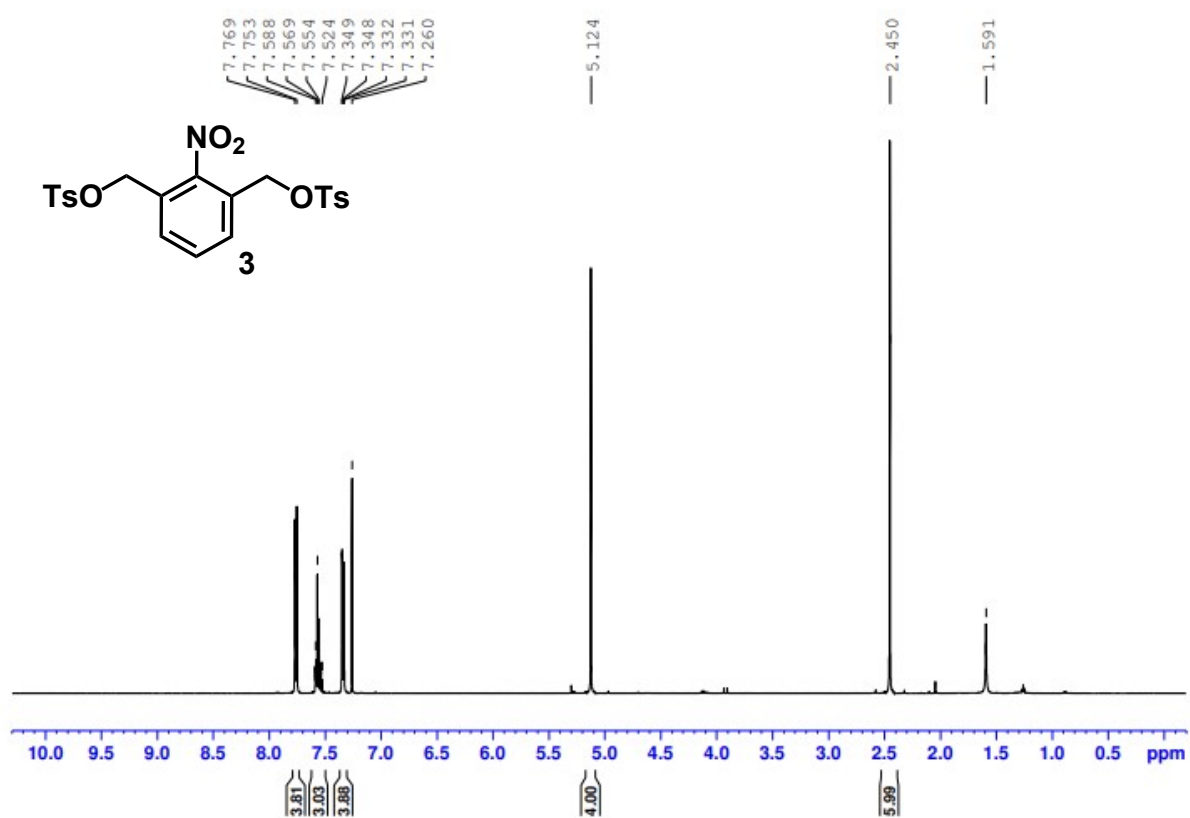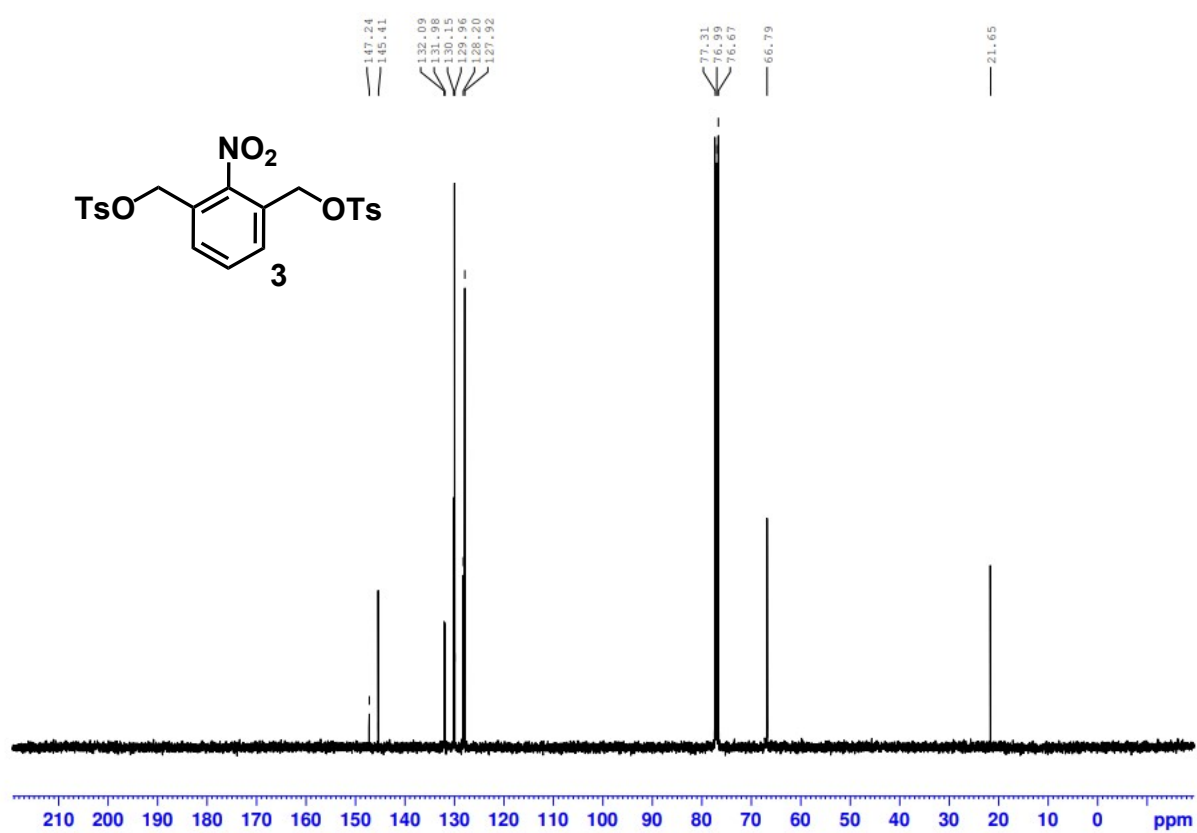

$^1\text{H}$  NMR (CDCl<sub>3</sub>, 500 MHz) and  $^{13}\text{C}$  NMR (CDCl<sub>3</sub>, 100 MHz) spectra of compound **3**



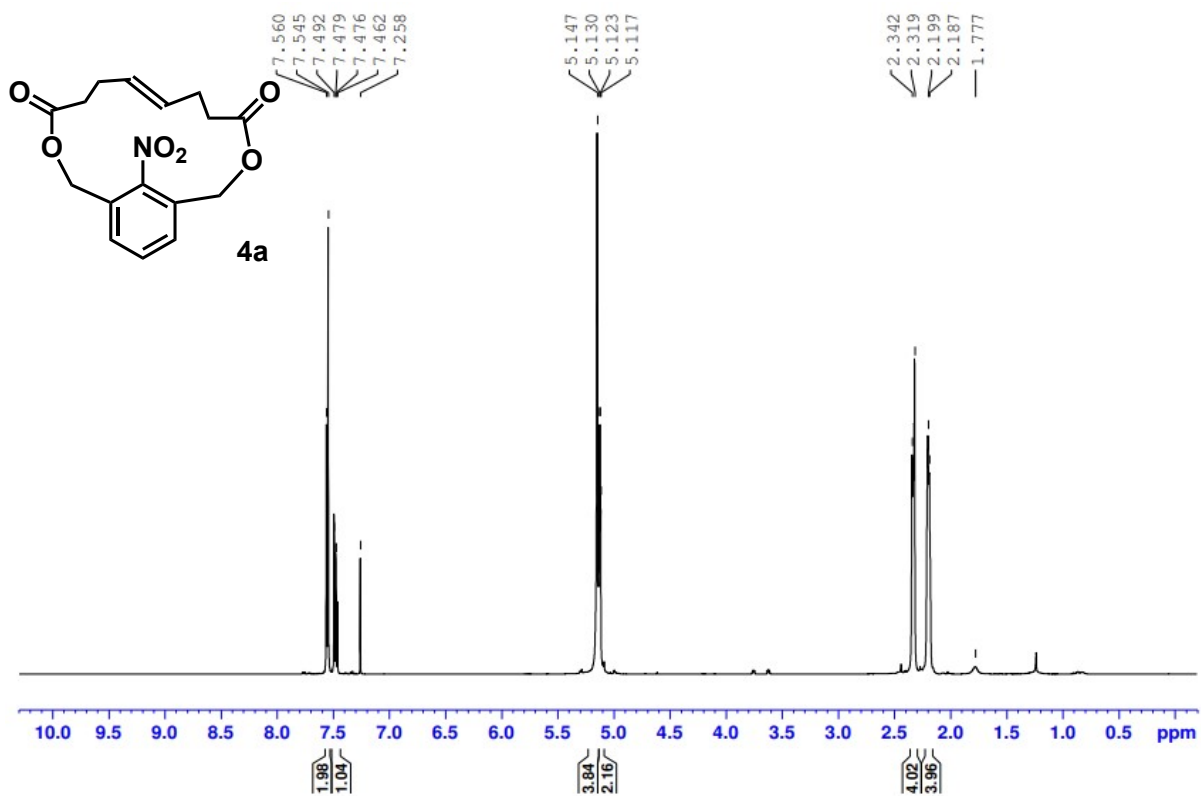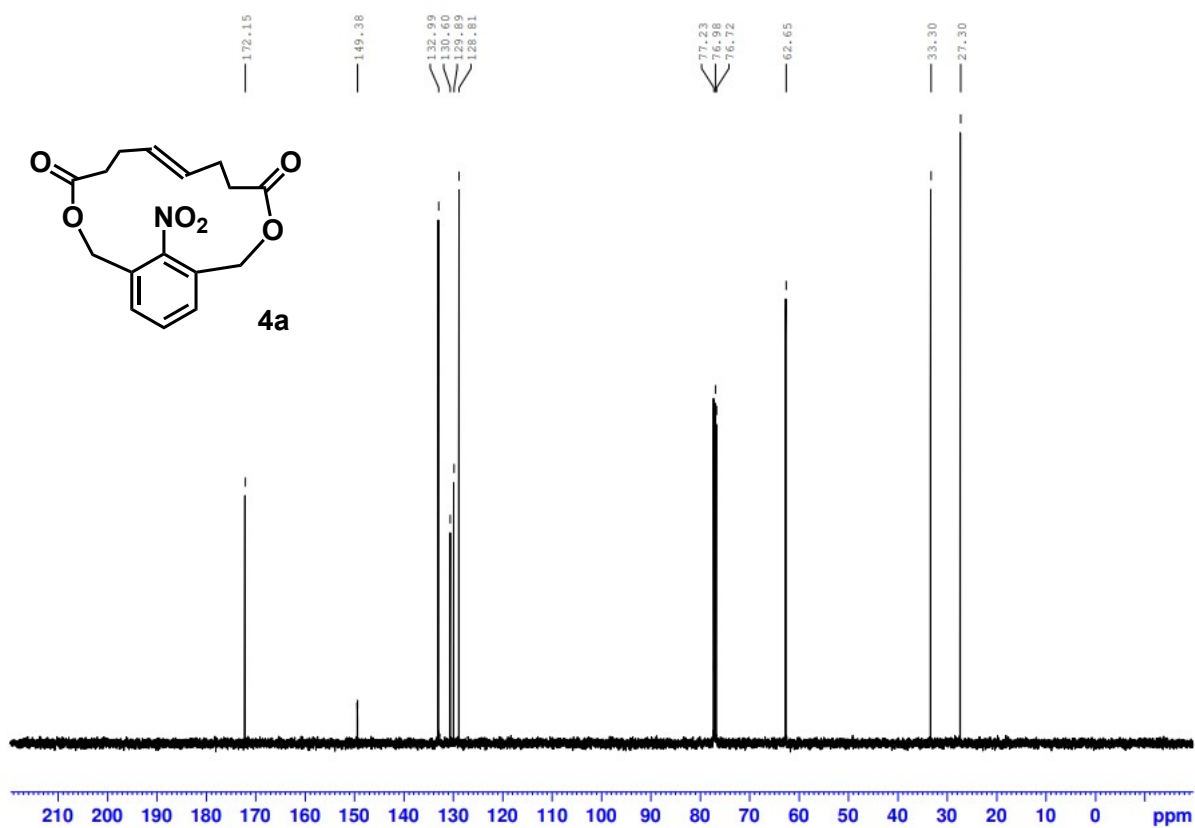

<sup>1</sup>H NMR (CDCl<sub>3</sub>, 500 MHz) and <sup>13</sup>C NMR (CDCl<sub>3</sub>, 125 MHz) spectra of compound **4a**

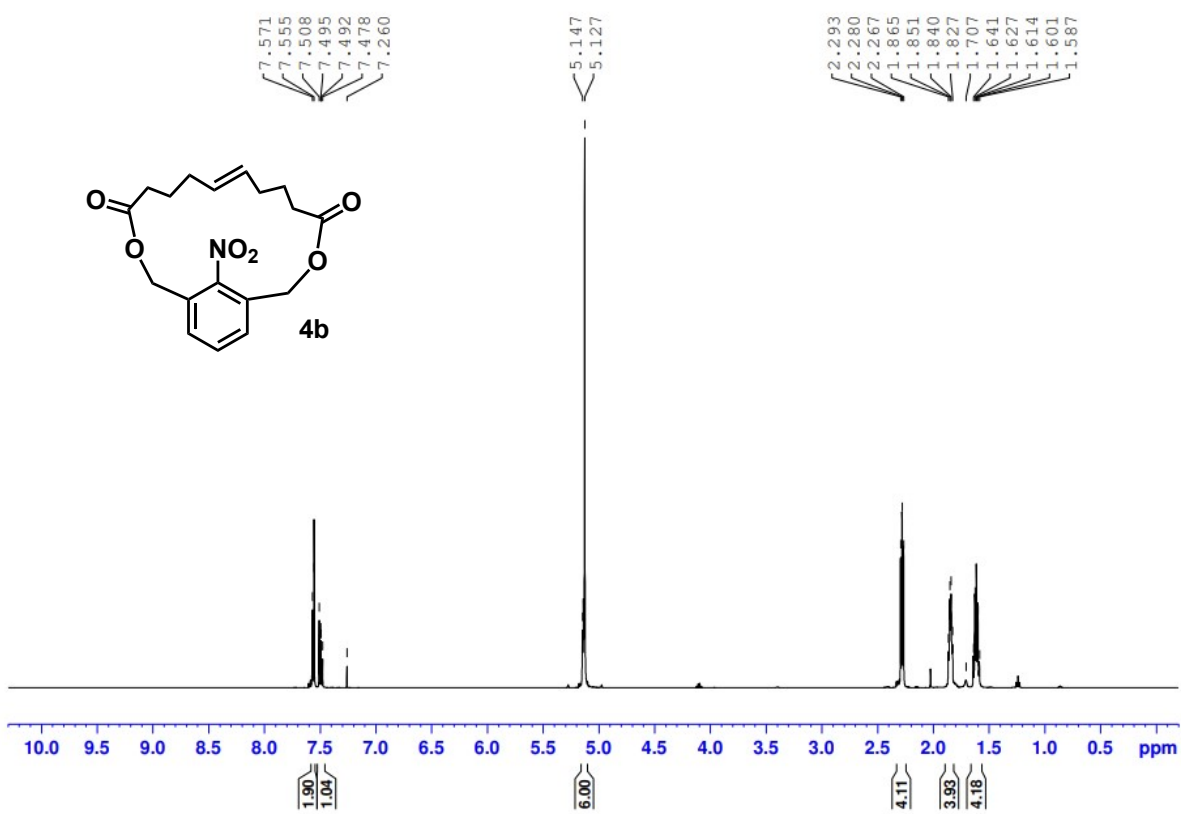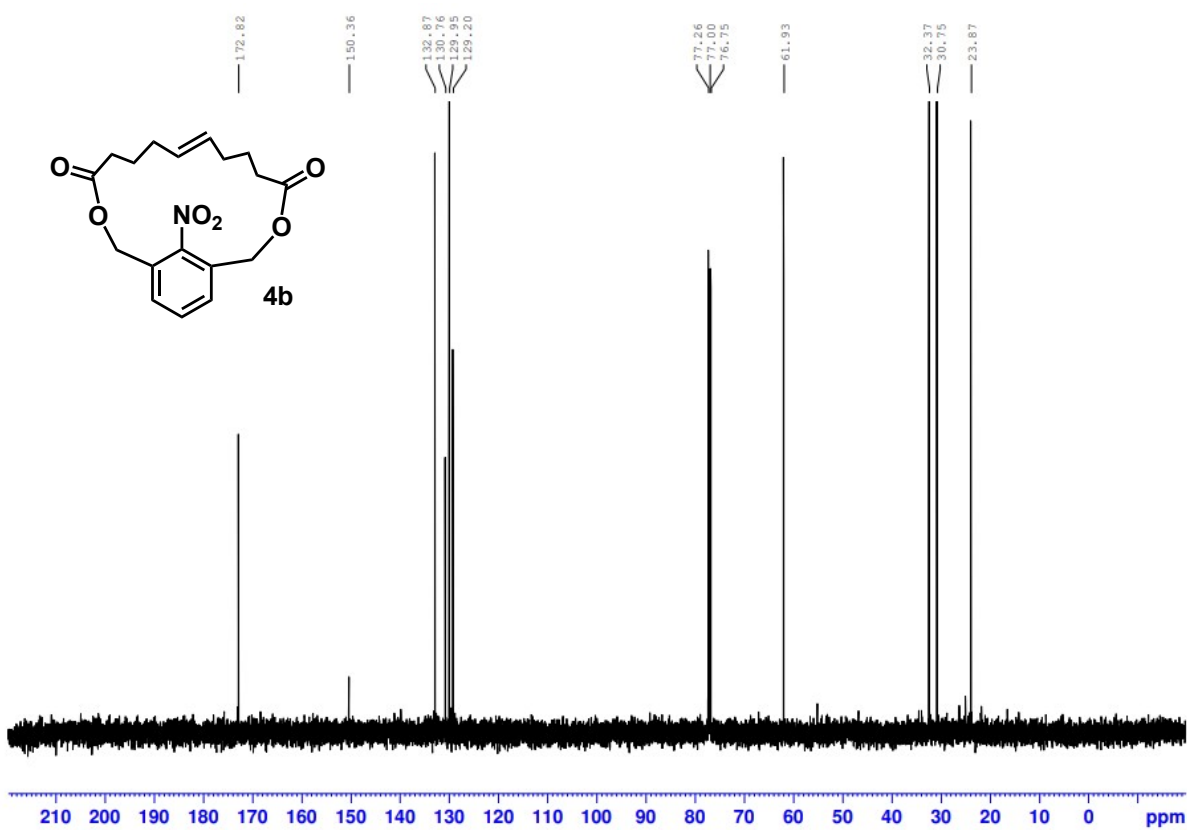

<sup>1</sup>H NMR (CDCl<sub>3</sub>, 500 MHz) and <sup>13</sup>C NMR (CDCl<sub>3</sub>, 125 MHz) spectra of compound **4b**

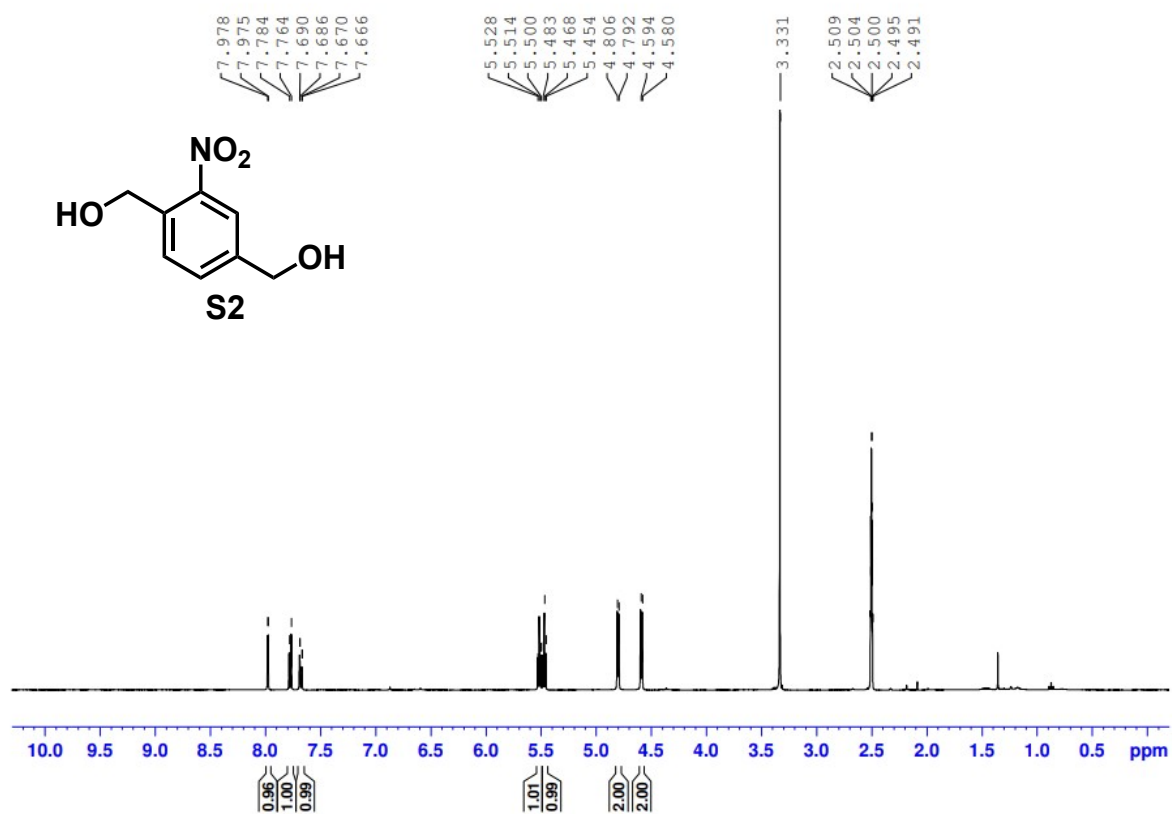

<sup>1</sup>H NMR (DMSO-d<sub>6</sub>, 500 MHz) spectra of compound **S2**

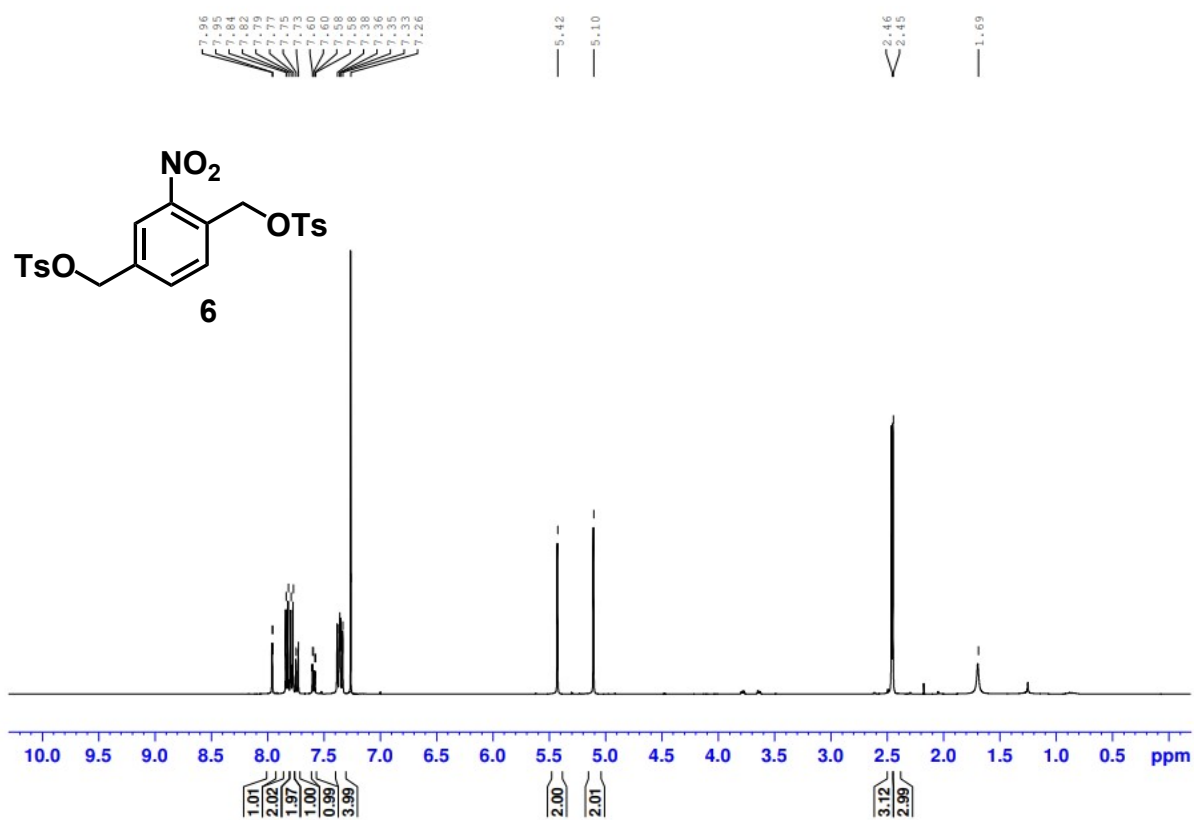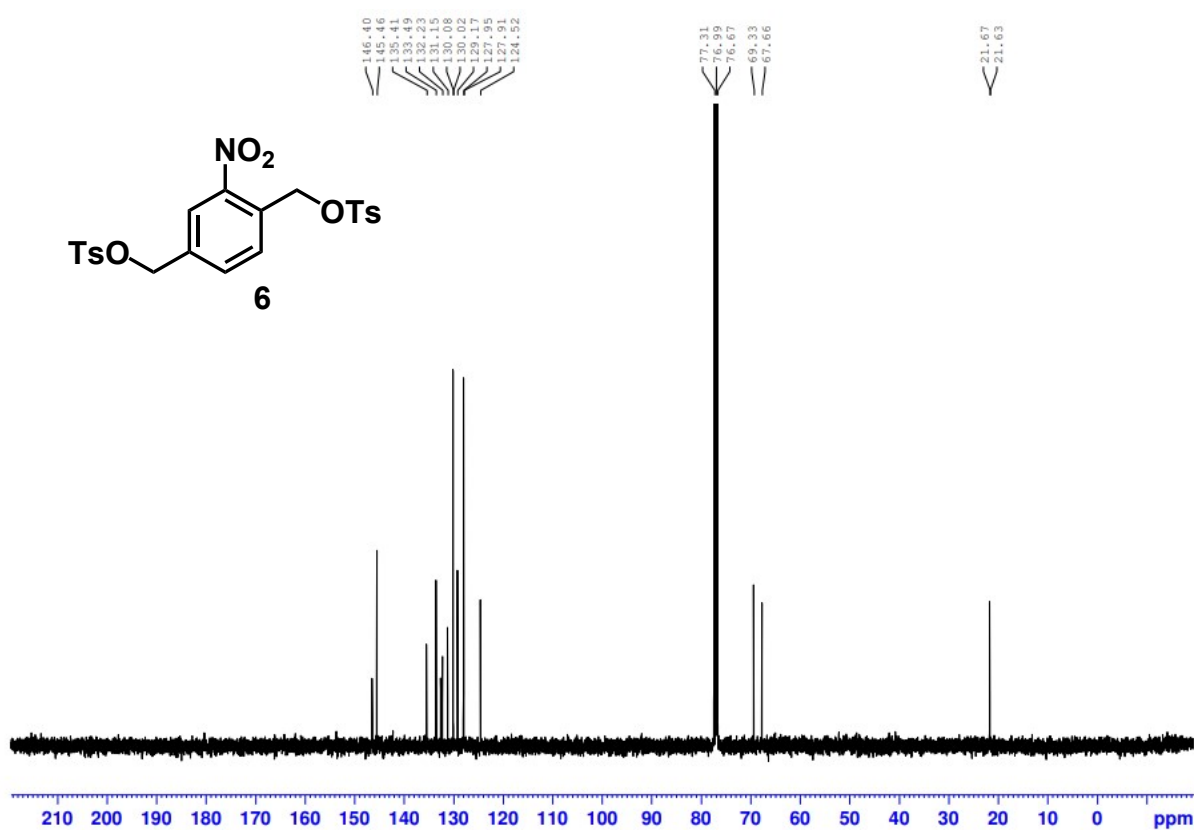

<sup>1</sup>H NMR (CDCl<sub>3</sub>, 400 MHz) and <sup>13</sup>C NMR (CDCl<sub>3</sub>, 100 MHz) spectra of compound **6**

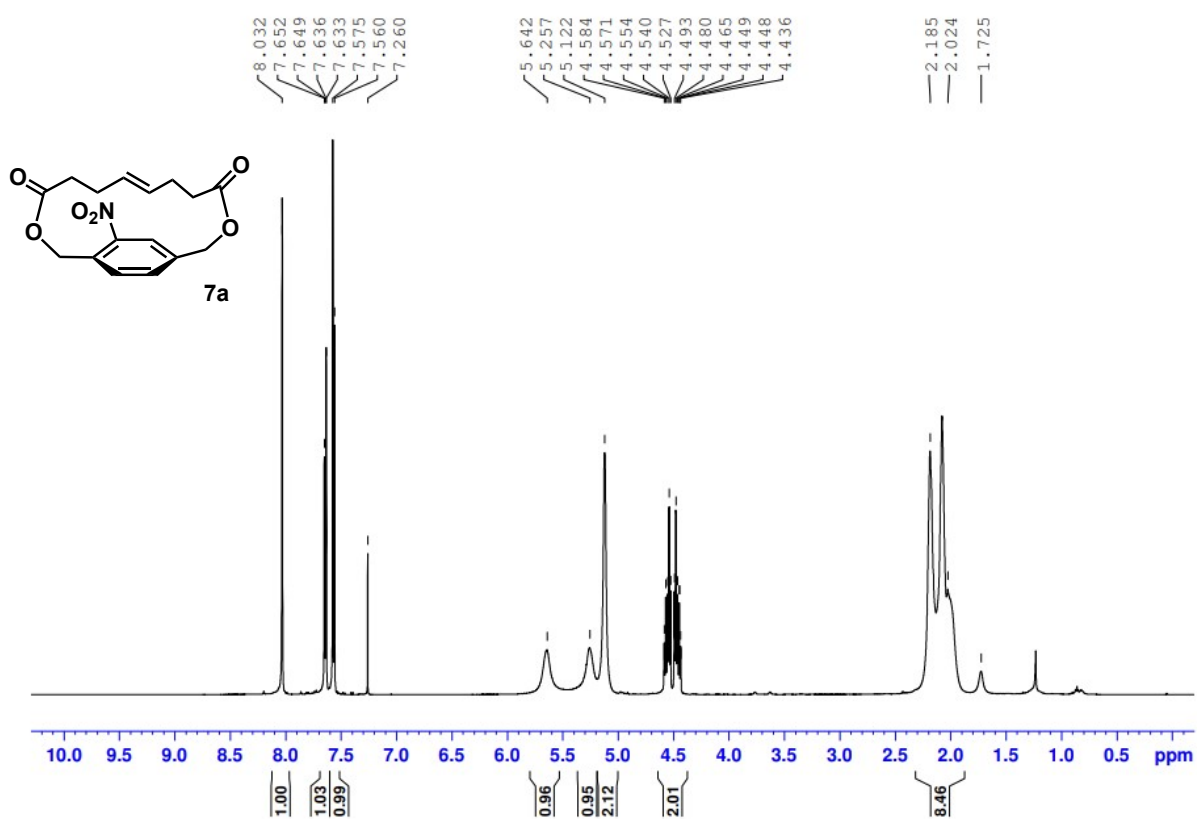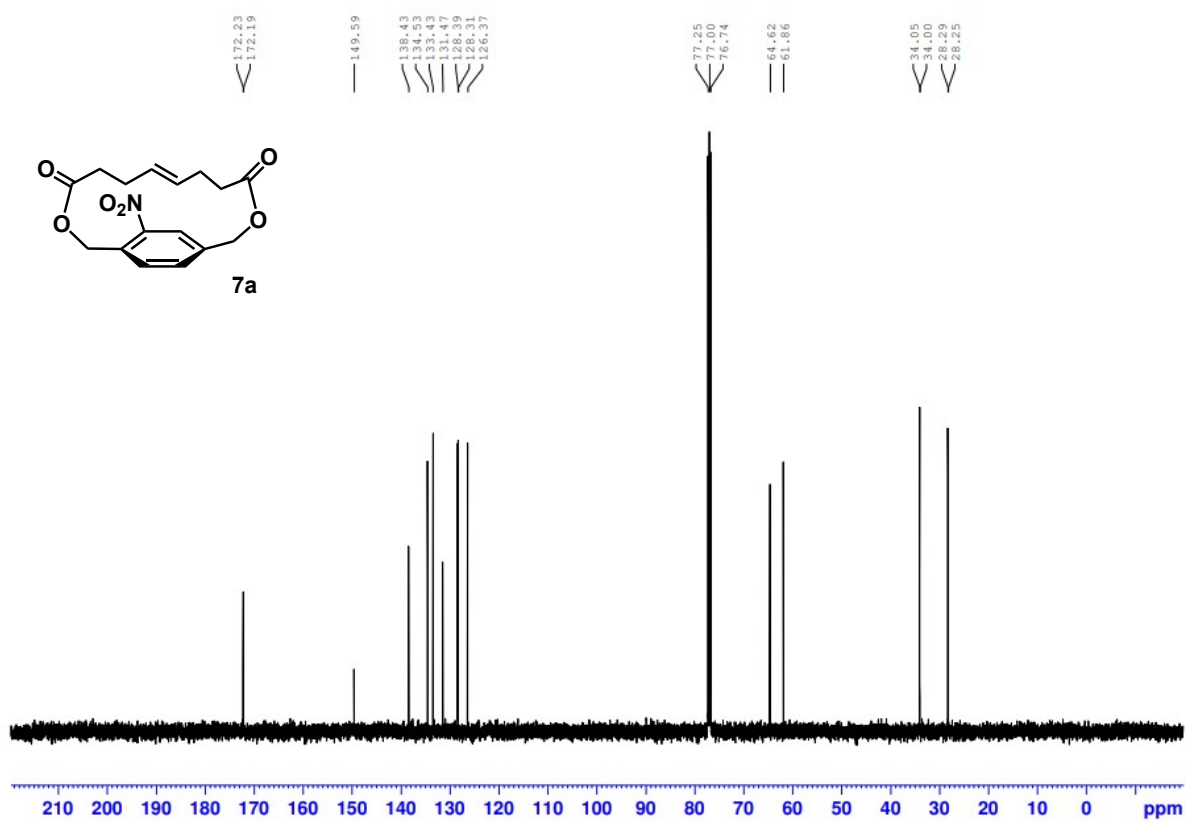

$^1\text{H}$  NMR ( $\text{CDCl}_3$ , 500 MHz) and  $^{13}\text{C}$  NMR ( $\text{CDCl}_3$ , 125 MHz) spectra of compound **7a**

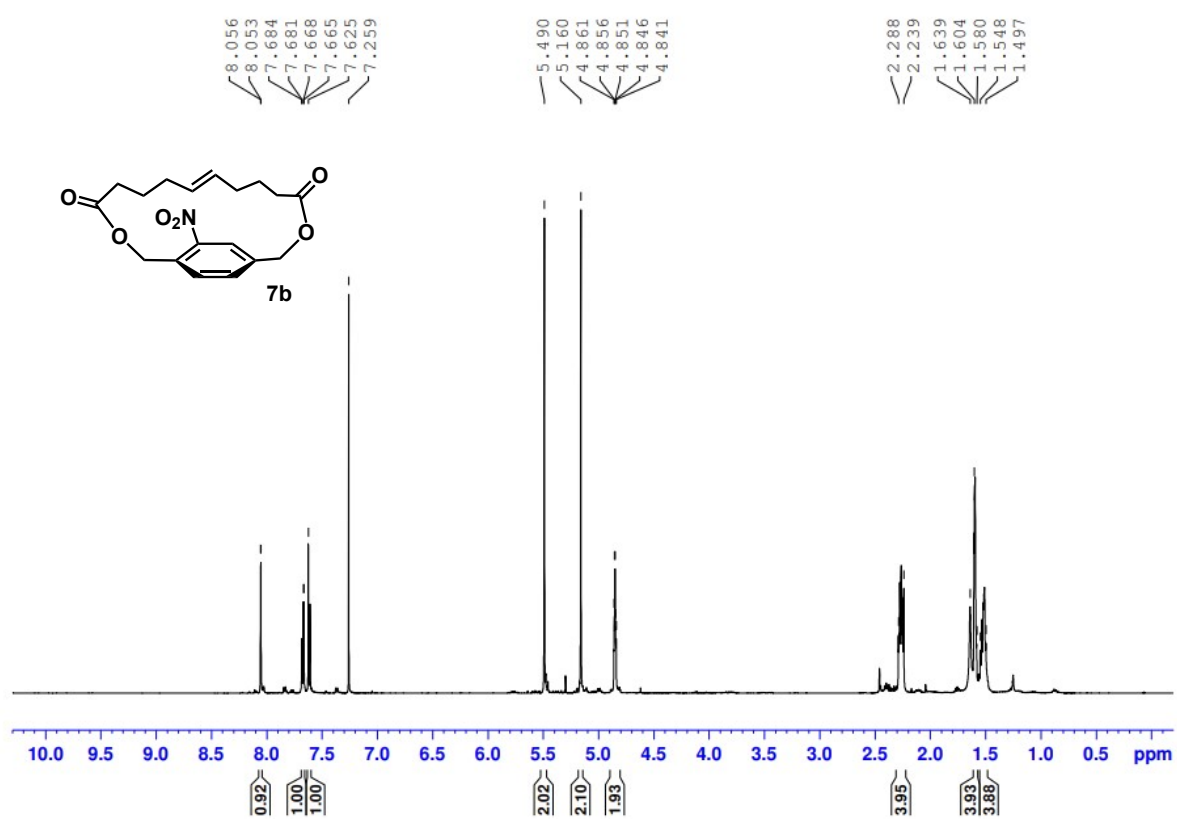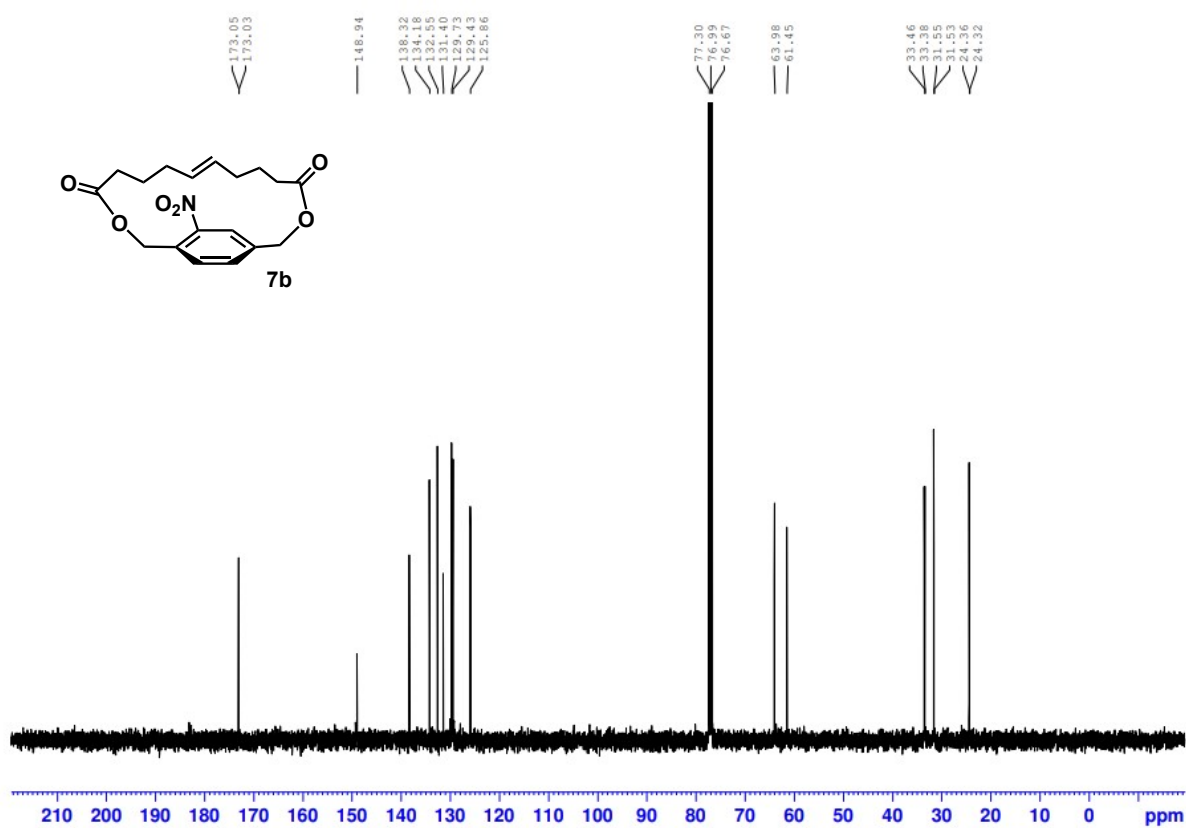

$^1\text{H}$  NMR (CDCl<sub>3</sub>, 500 MHz) and  $^{13}\text{C}$  NMR (CDCl<sub>3</sub>, 100 MHz) spectra of compound **7b**

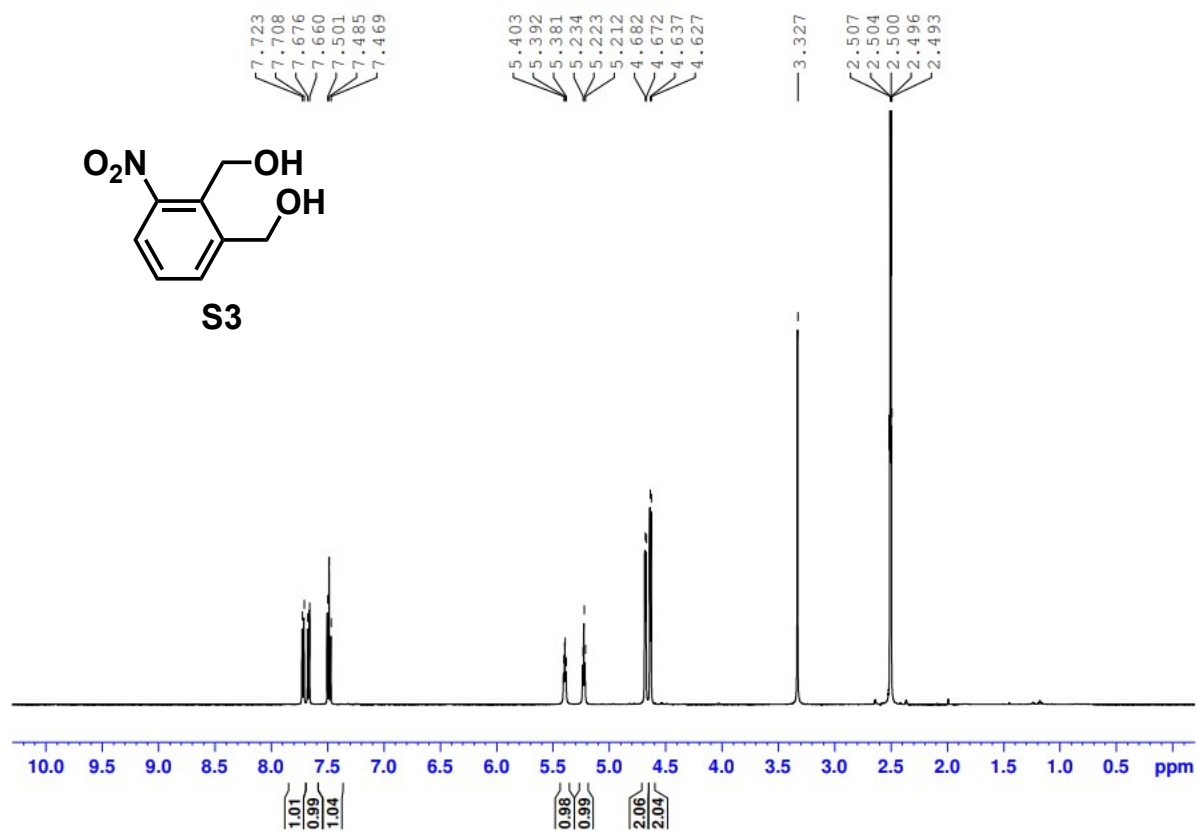

<sup>1</sup>H NMR (DMSO-d<sub>6</sub>, 500 MHz) spectra of compound **S3**

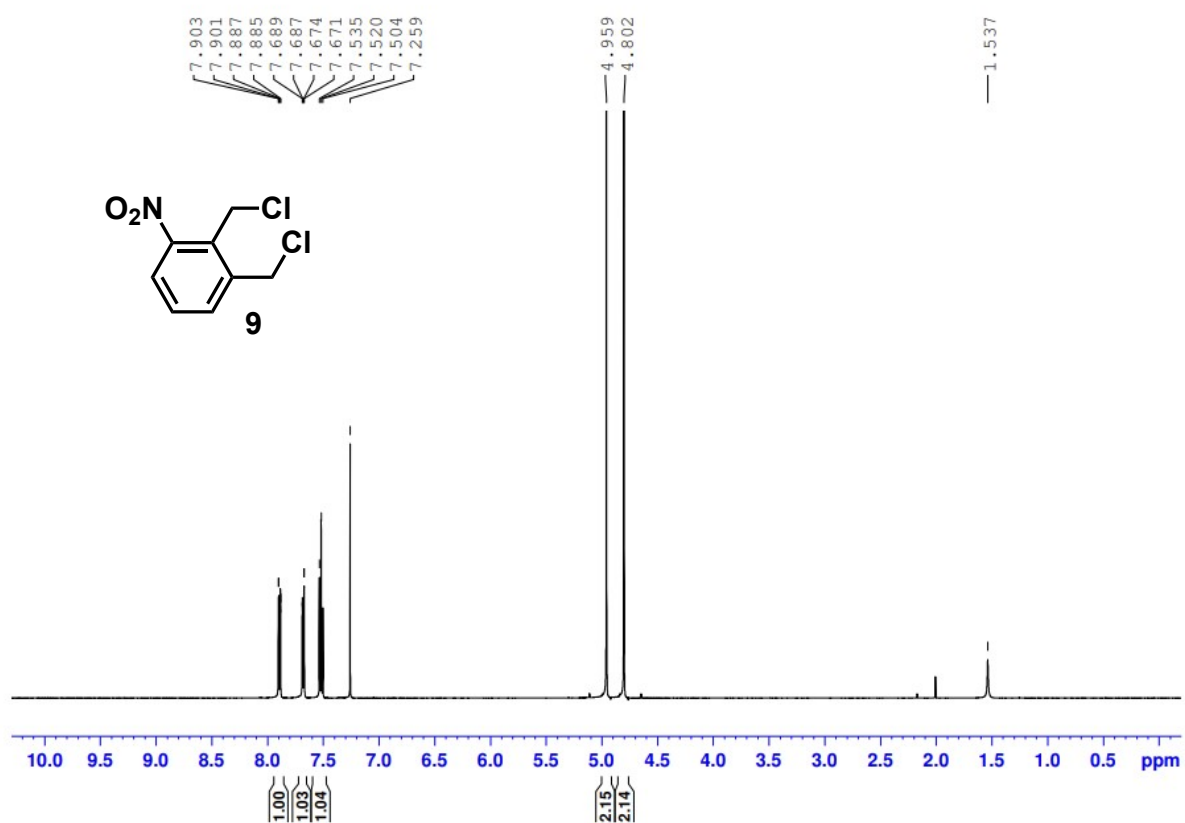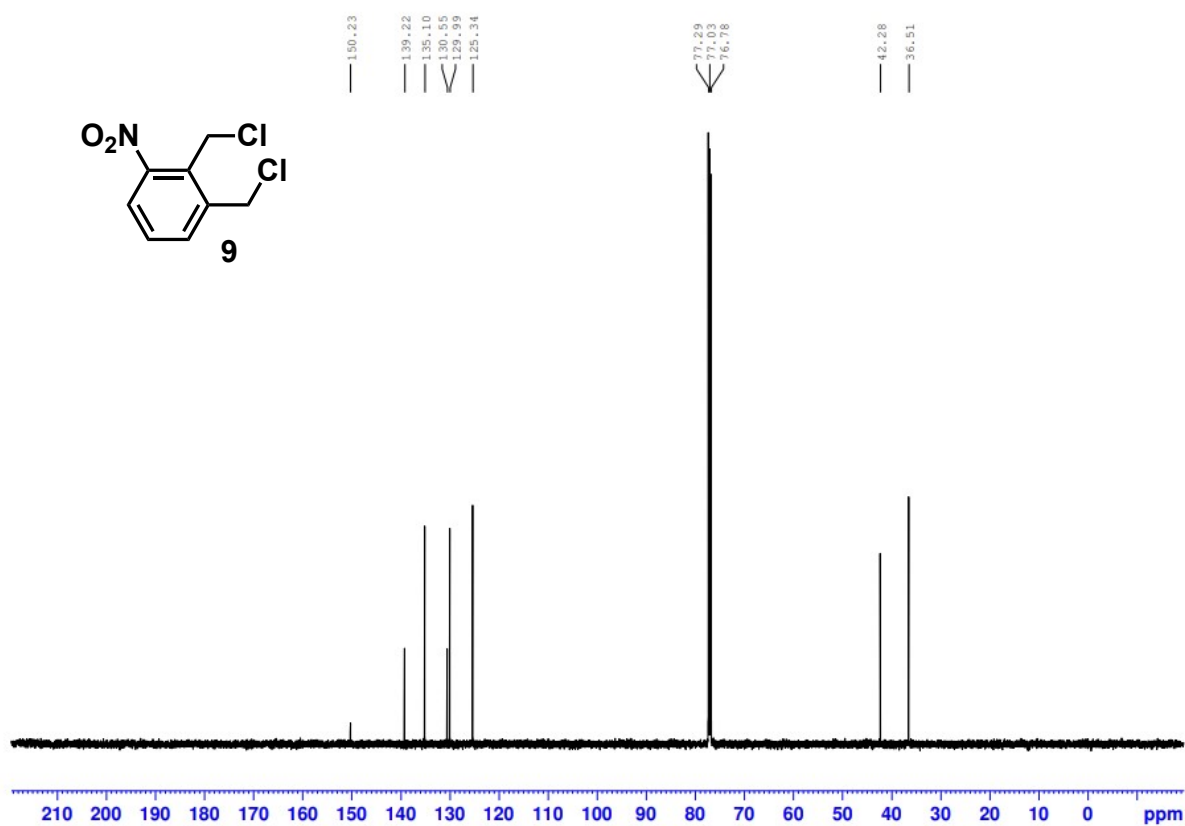

<sup>1</sup>H NMR (CDCl<sub>3</sub>, 500 MHz) and <sup>13</sup>C NMR (CDCl<sub>3</sub>, 125 MHz) spectra of compound **9**



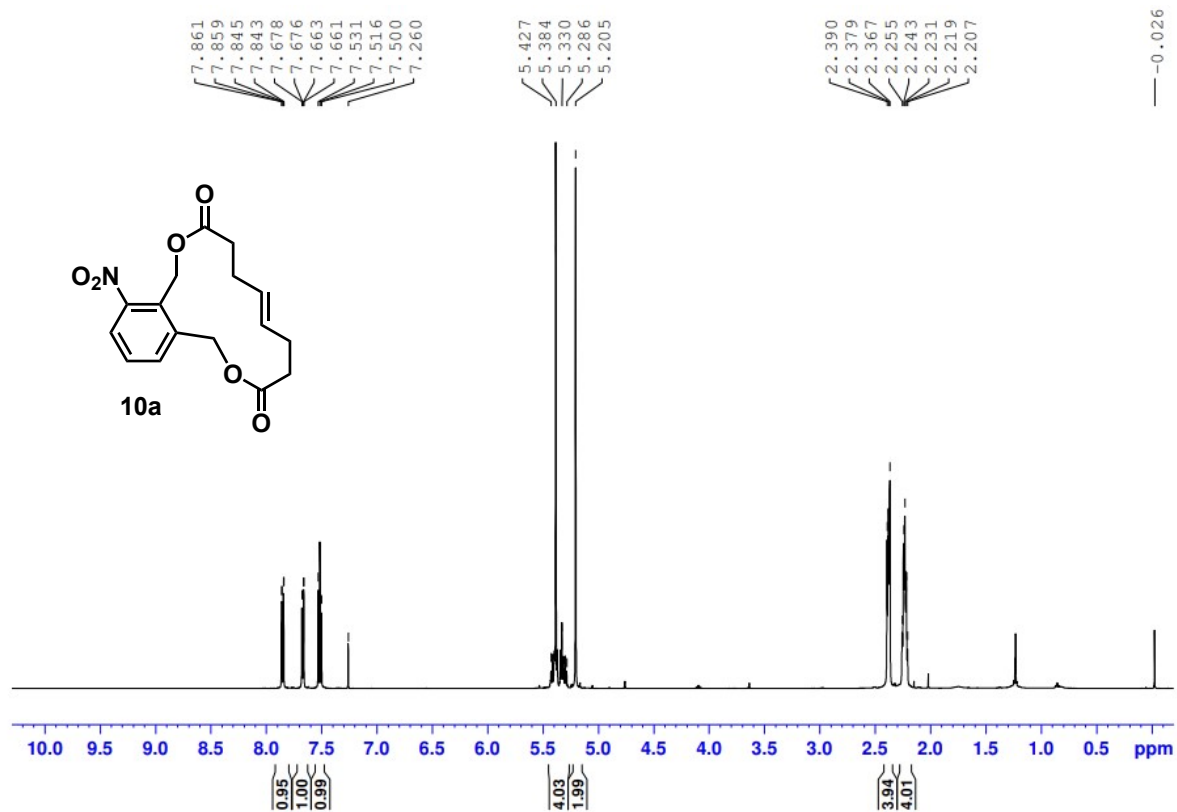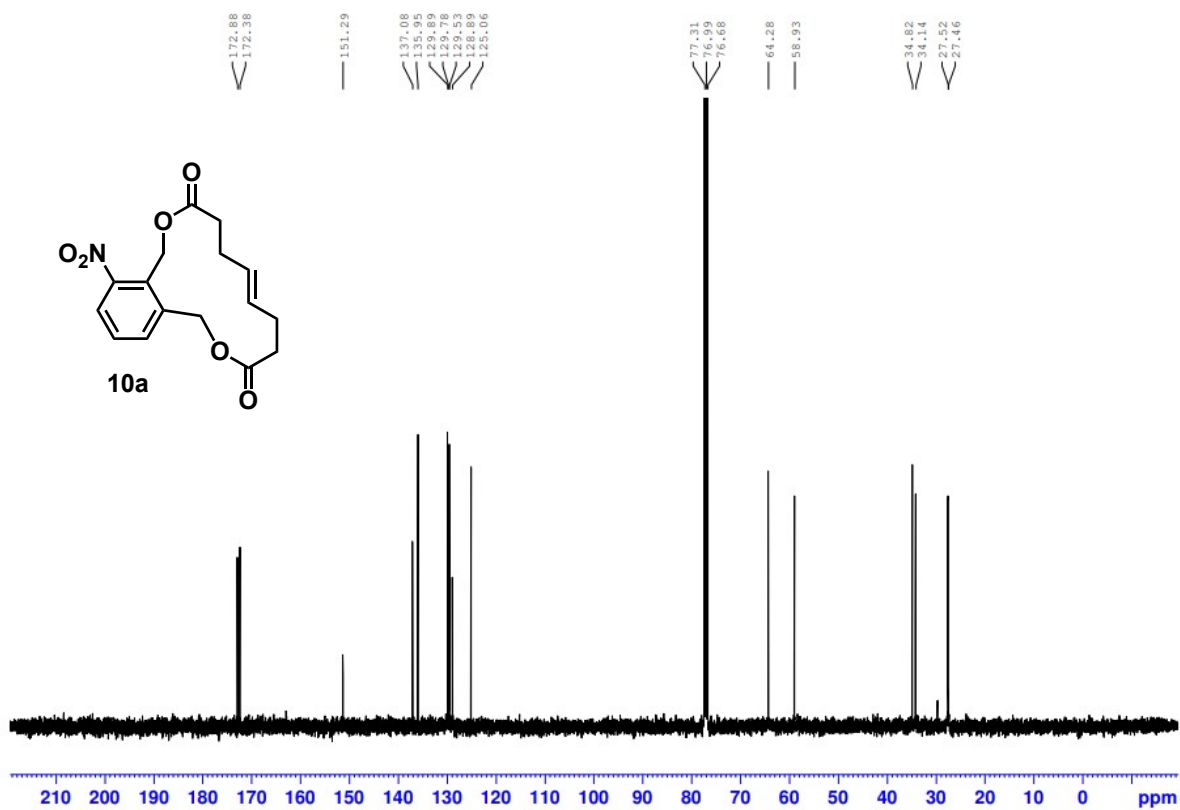

<sup>1</sup>H NMR (CDCl<sub>3</sub>, 500 MHz) and <sup>13</sup>C NMR (CDCl<sub>3</sub>, 100 MHz) spectra of compound **10a**

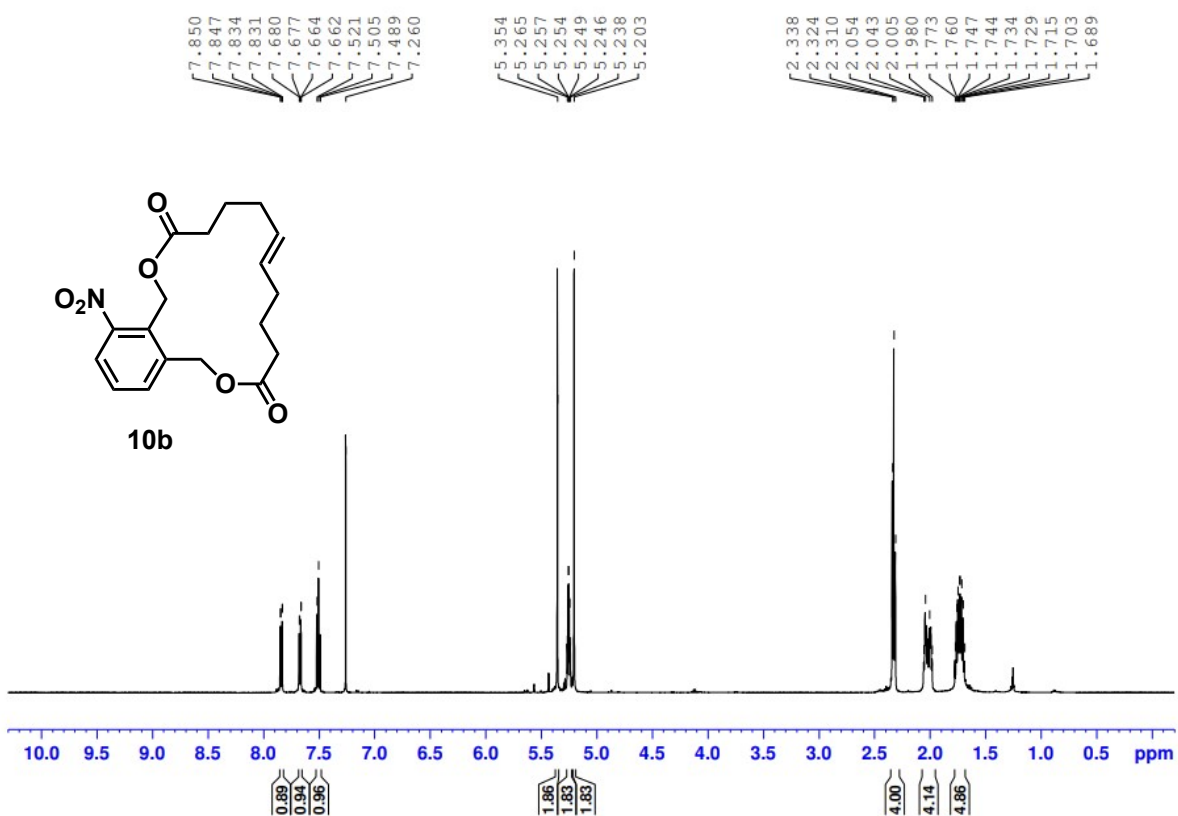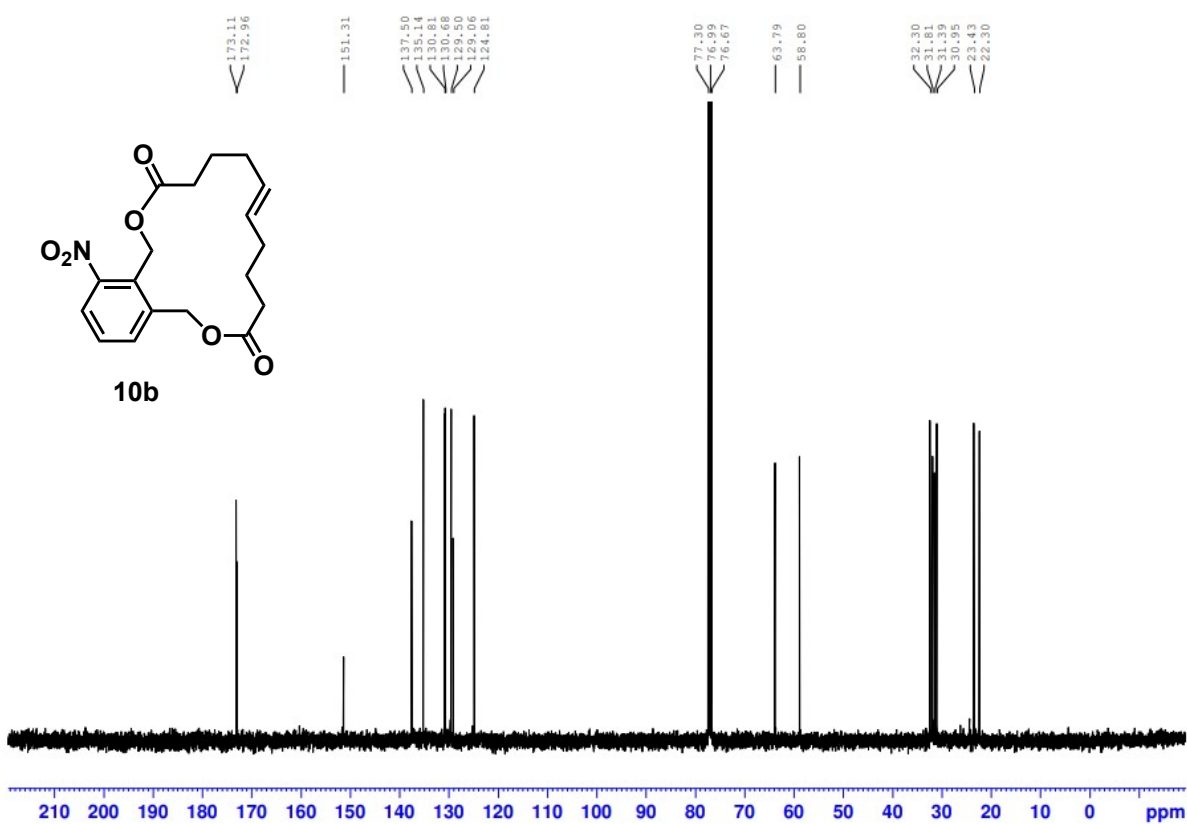

<sup>1</sup>H NMR (CDCl<sub>3</sub>, 500 MHz) and <sup>13</sup>C NMR (CDCl<sub>3</sub>, 100 MHz) spectra of compound **10b**

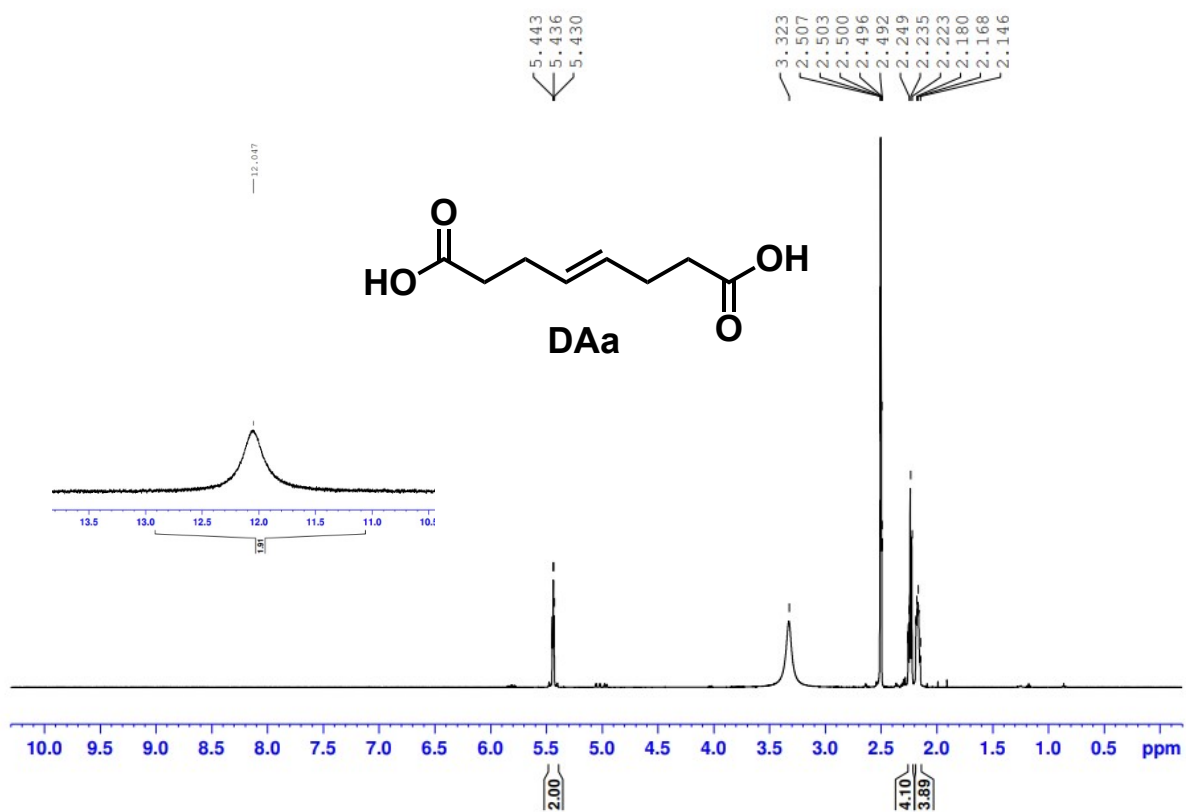

<sup>1</sup>H NMR (DMSO-d<sub>6</sub>, 500 MHz) spectra of compound DAa

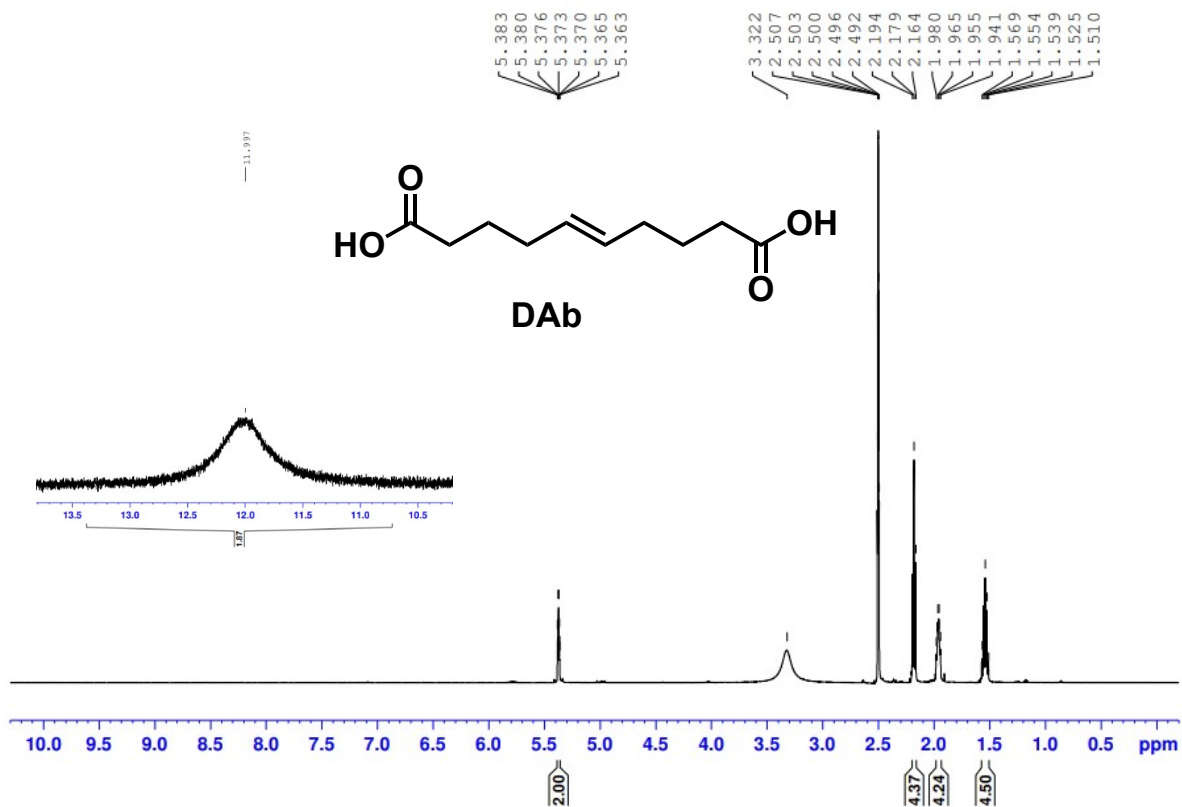

<sup>1</sup>H NMR (DMSO-d<sub>6</sub>, 500 MHz) spectra of compound DAb.

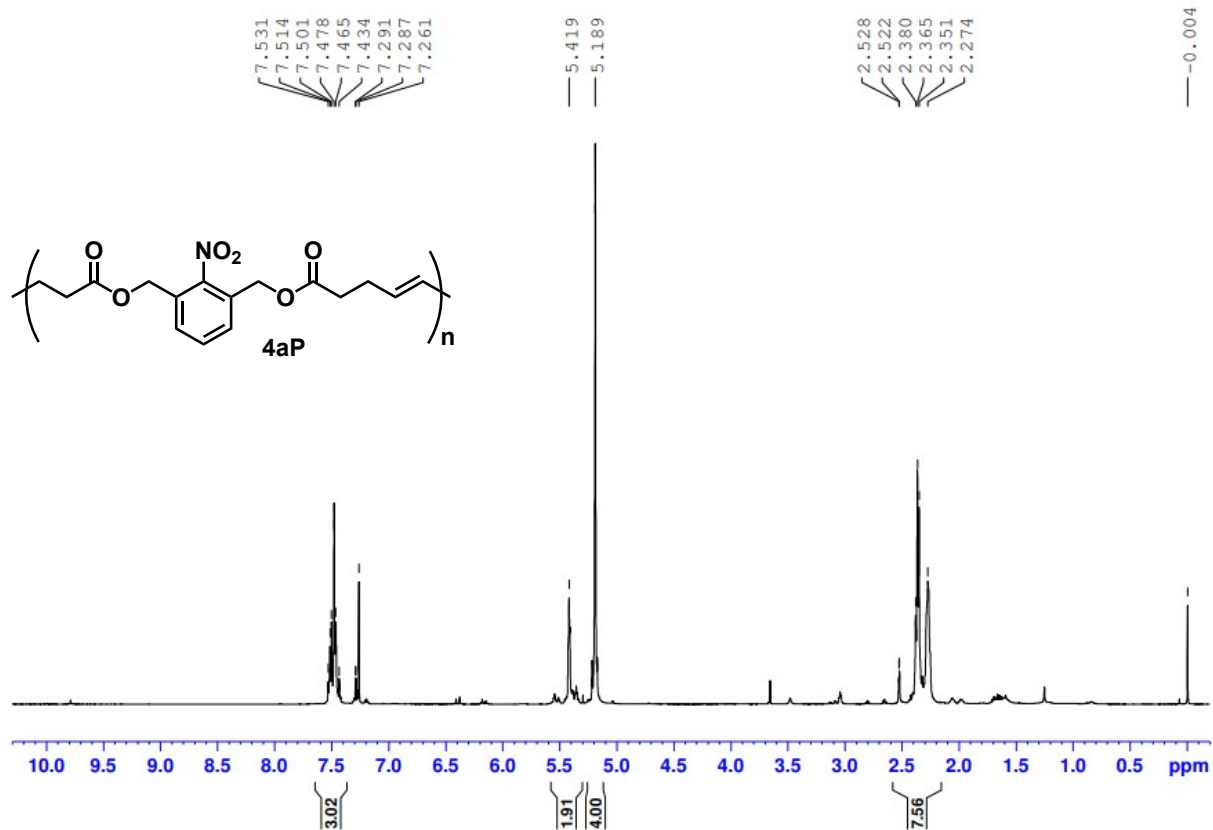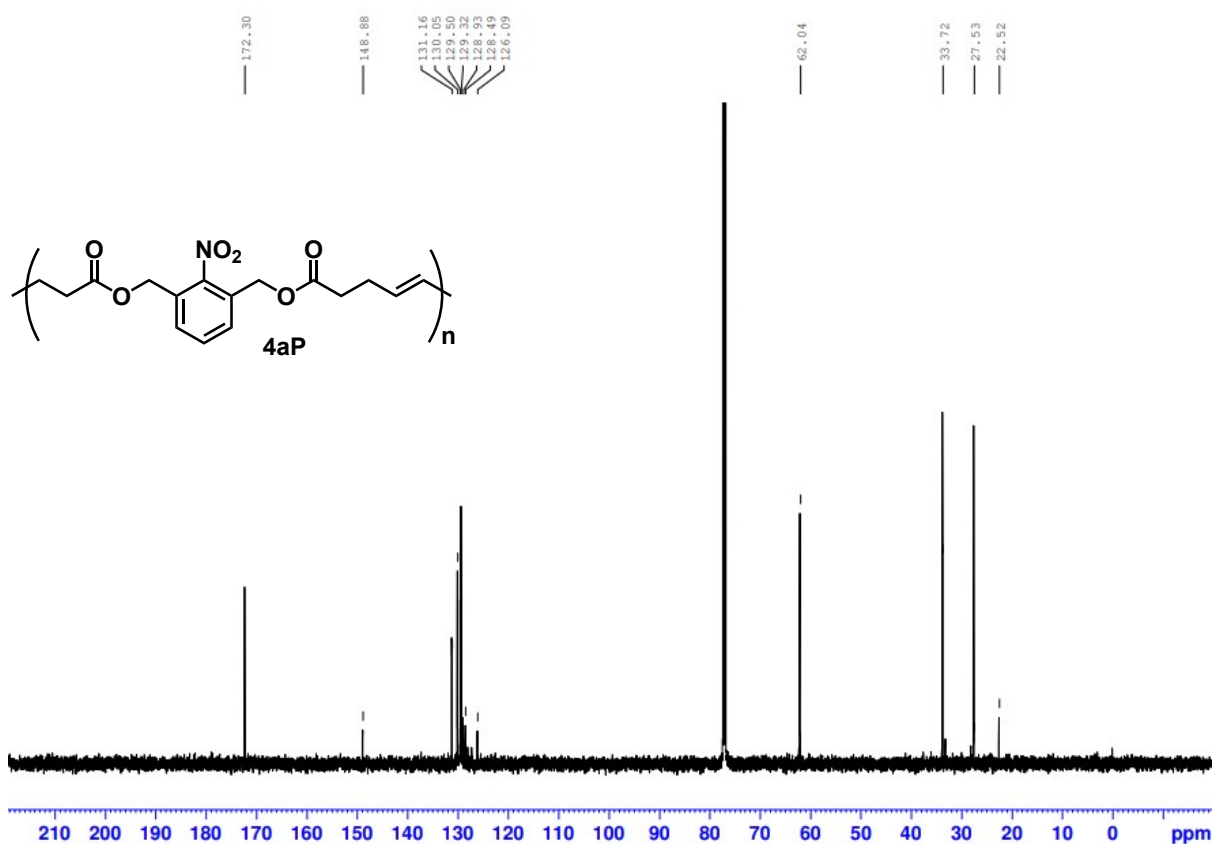

<sup>1</sup>H NMR (CDCl<sub>3</sub>, 500 MHz) and <sup>13</sup>C NMR (CDCl<sub>3</sub>, 125 MHz) spectra of compound **4aP**.

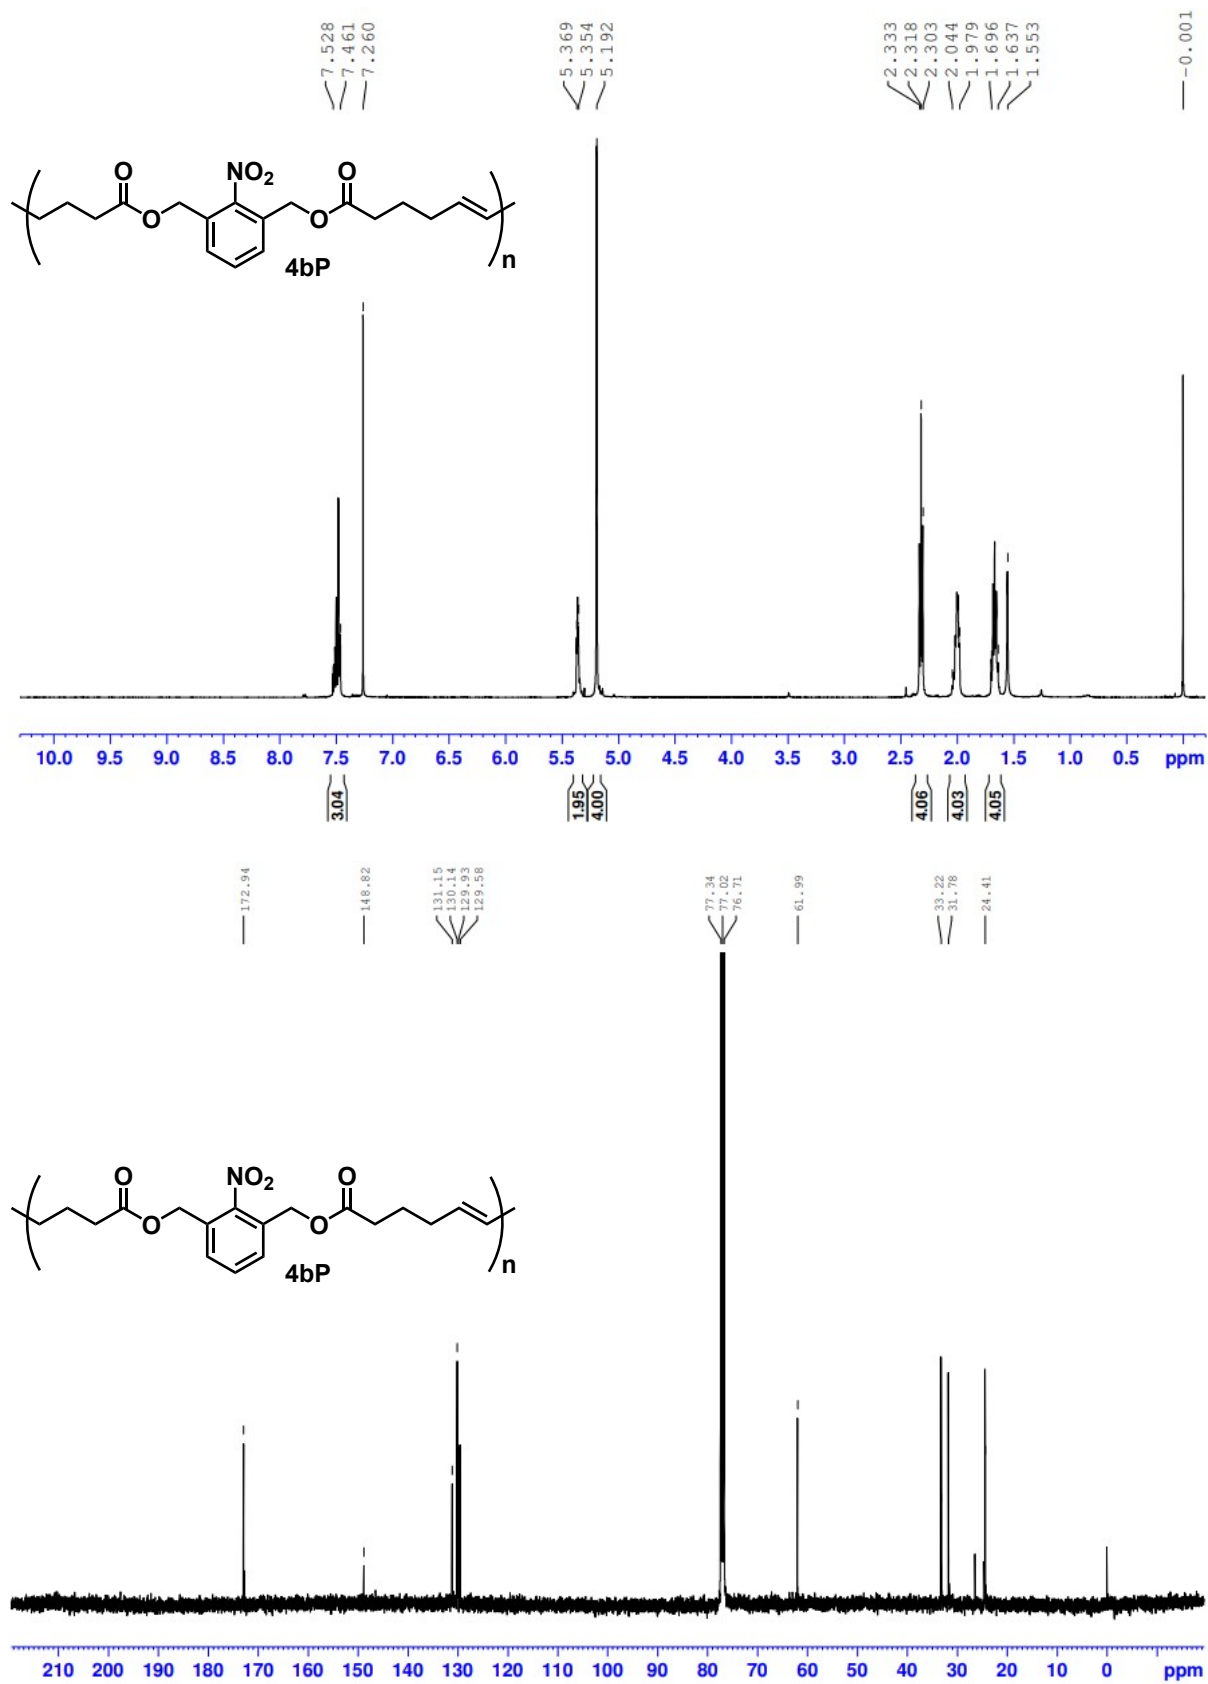

<sup>1</sup>H NMR (CDCl<sub>3</sub>, 500 MHz) and <sup>13</sup>C NMR (CDCl<sub>3</sub>, 100 MHz) spectra of compound **4bP**.

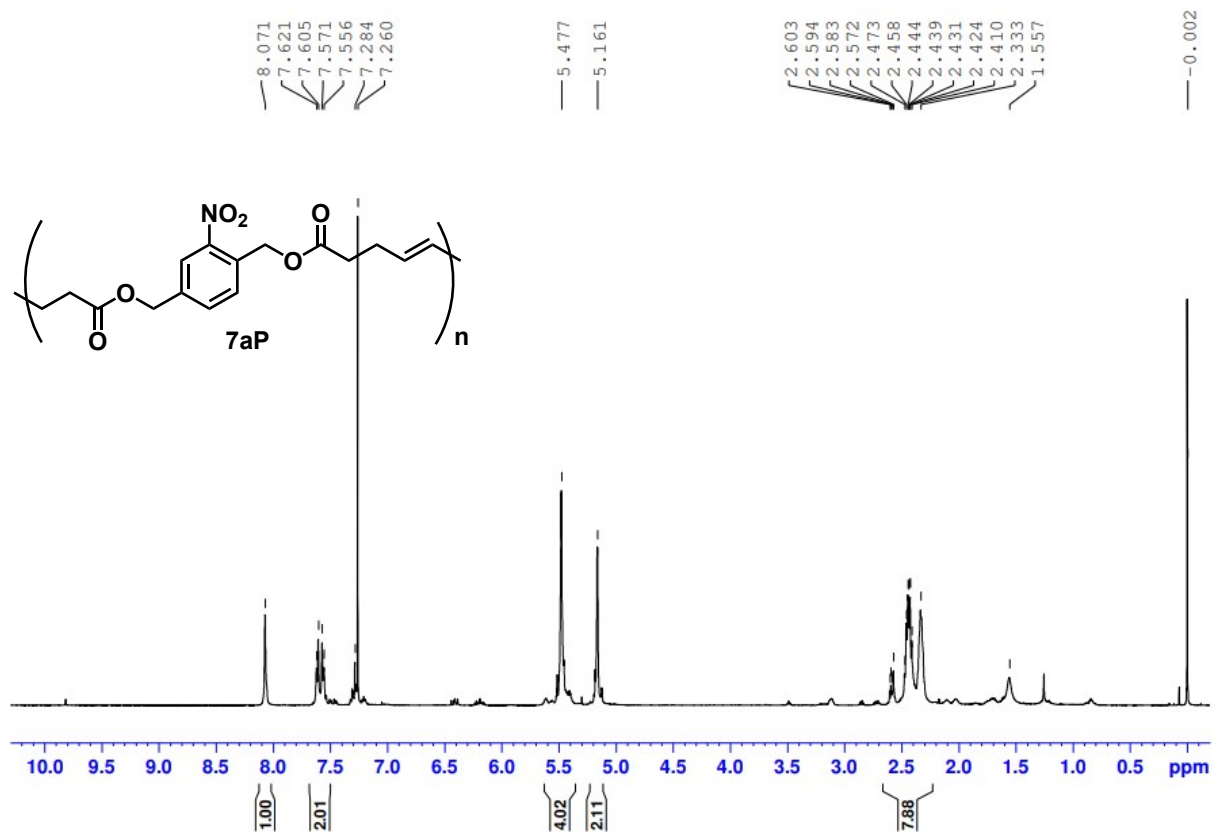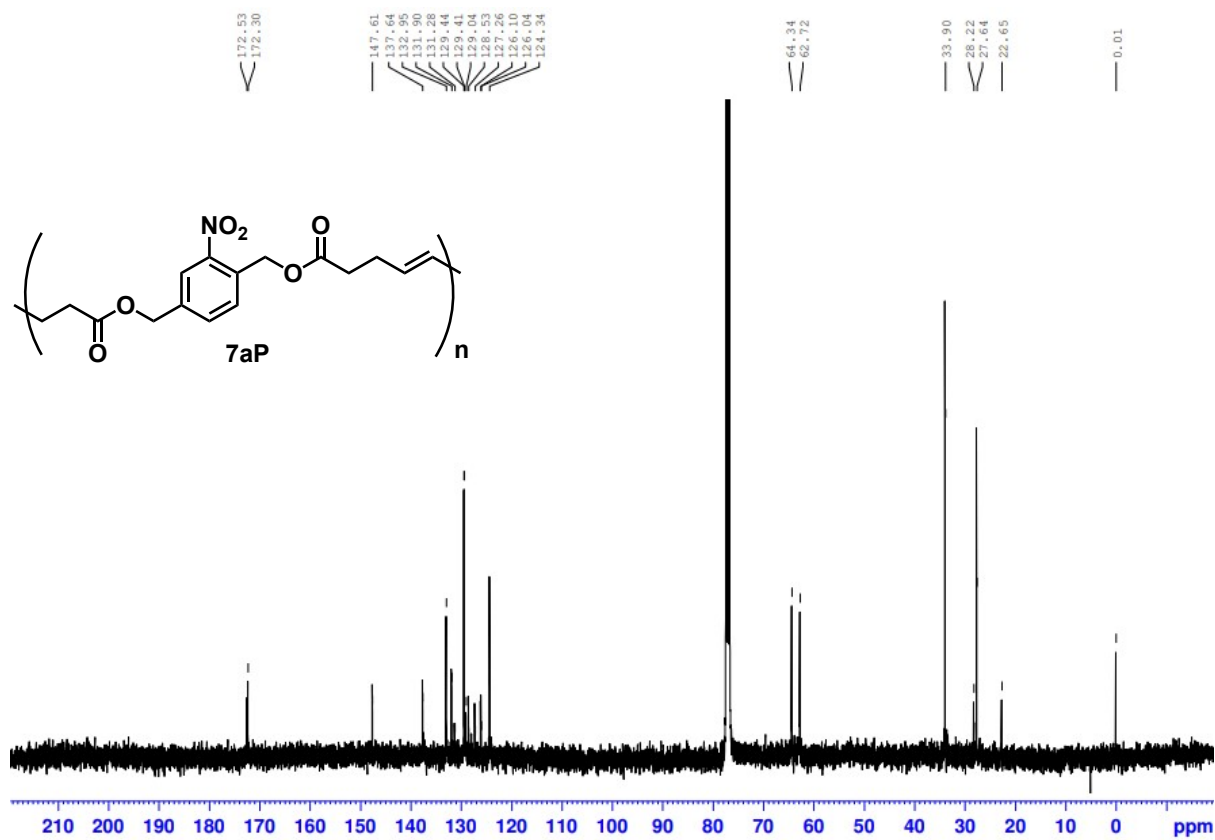

$^1\text{H}$  NMR (CDCl<sub>3</sub>, 500 MHz) and  $^{13}\text{C}$  NMR (CDCl<sub>3</sub>, 100 MHz) spectra of compound **7aP**.

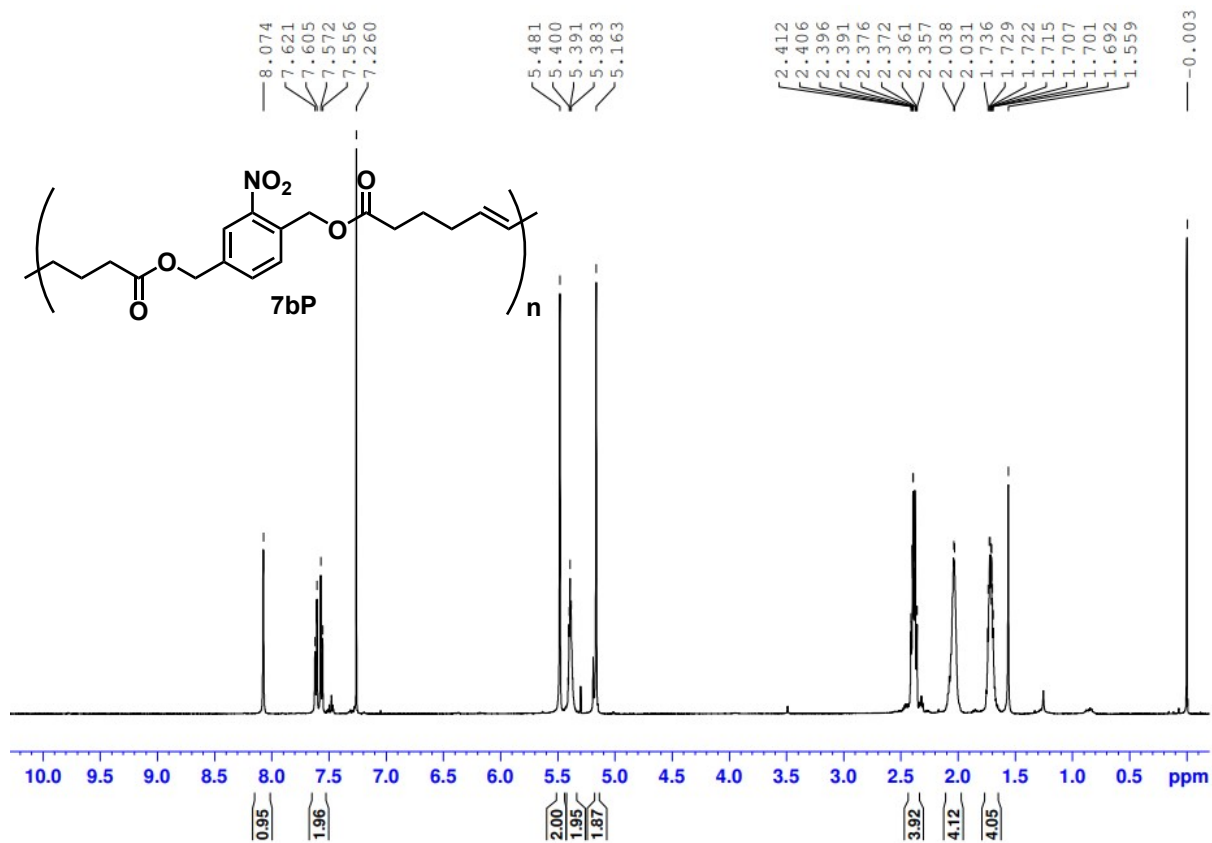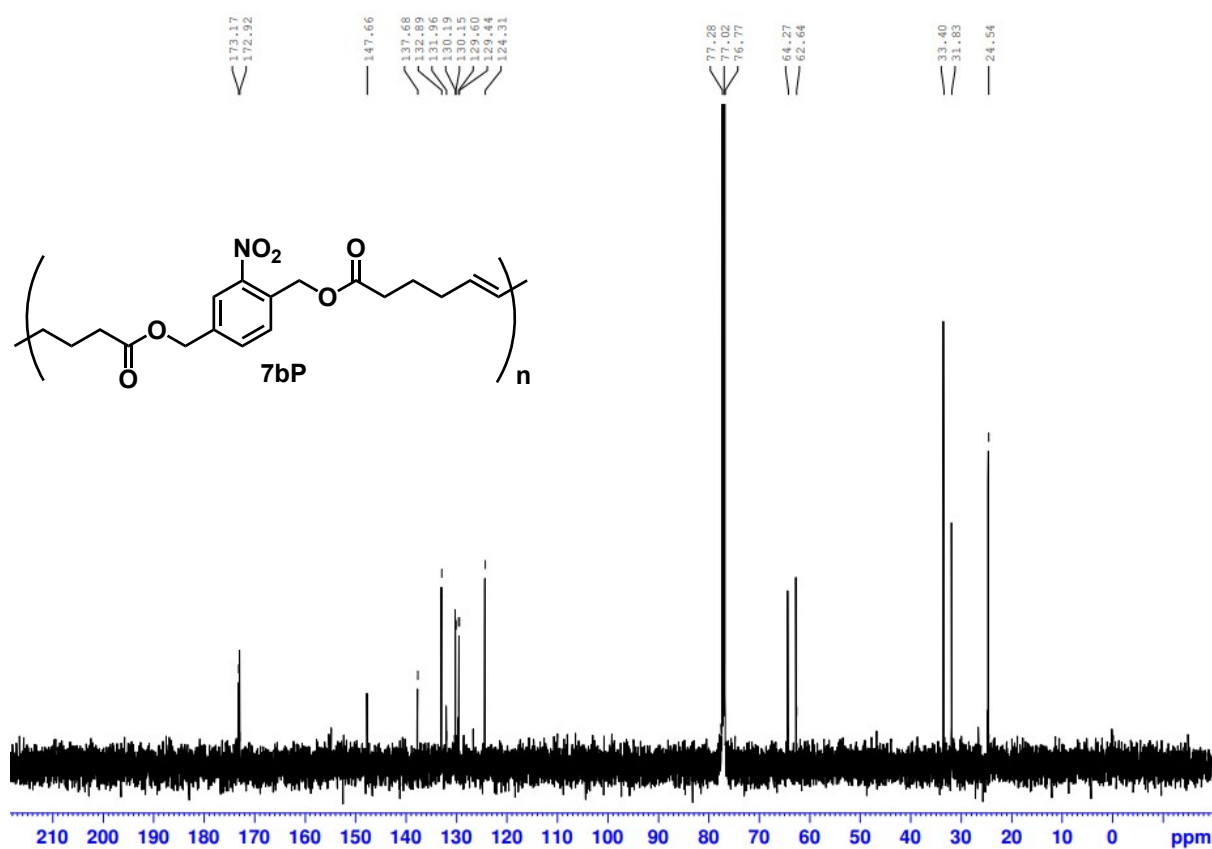

<sup>1</sup>H NMR (CDCl<sub>3</sub>, 500 MHz) and <sup>13</sup>C NMR (CDCl<sub>3</sub>, 125 MHz) spectra of compound **7bP**.

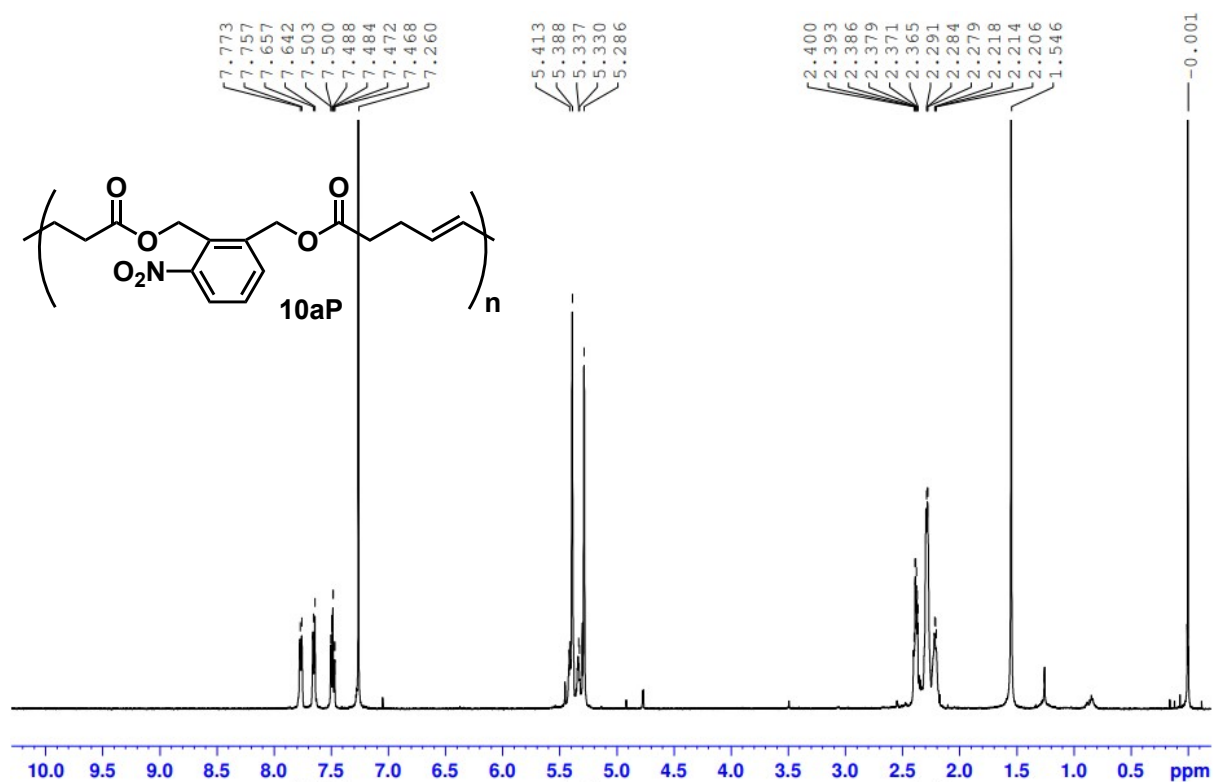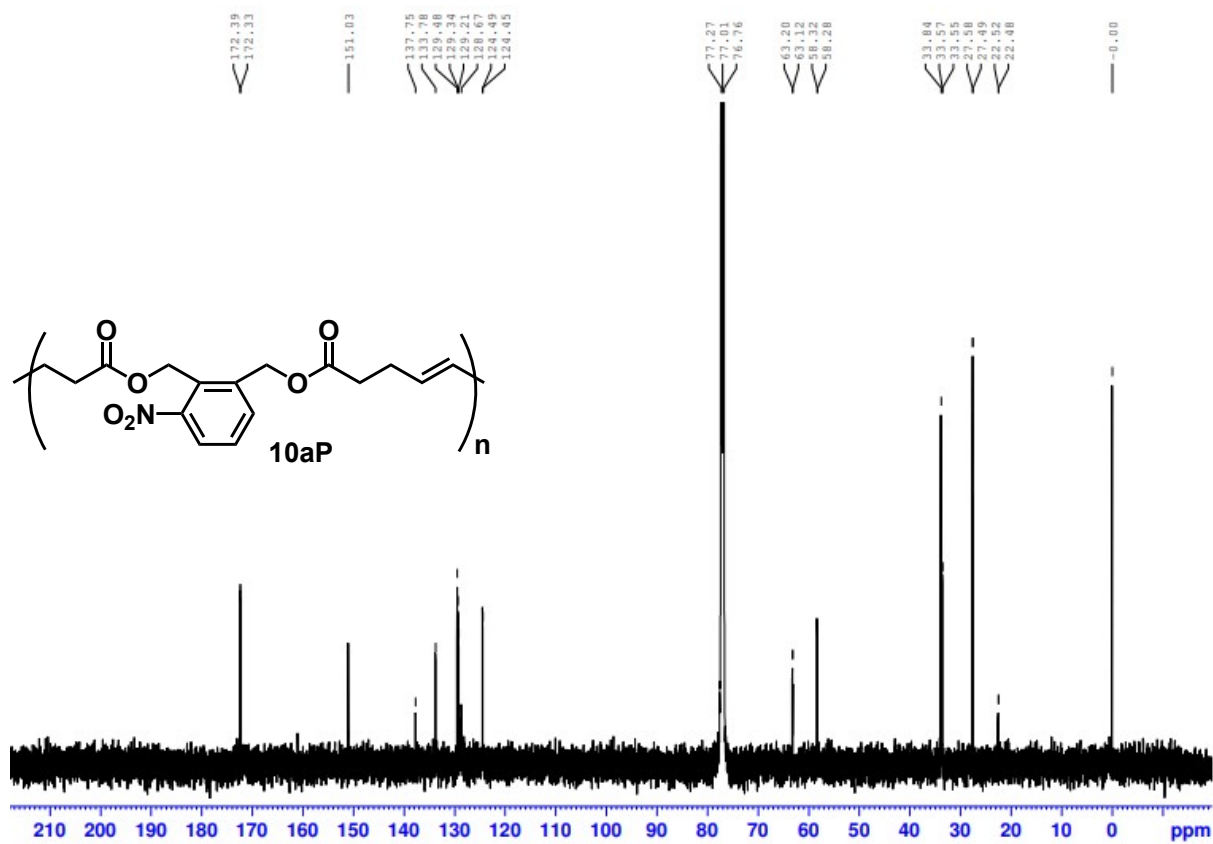

<sup>1</sup>H NMR (CDCl<sub>3</sub>, 500 MHz) and <sup>13</sup>C NMR (CDCl<sub>3</sub>, 125 MHz) spectra of compound **10aP**.



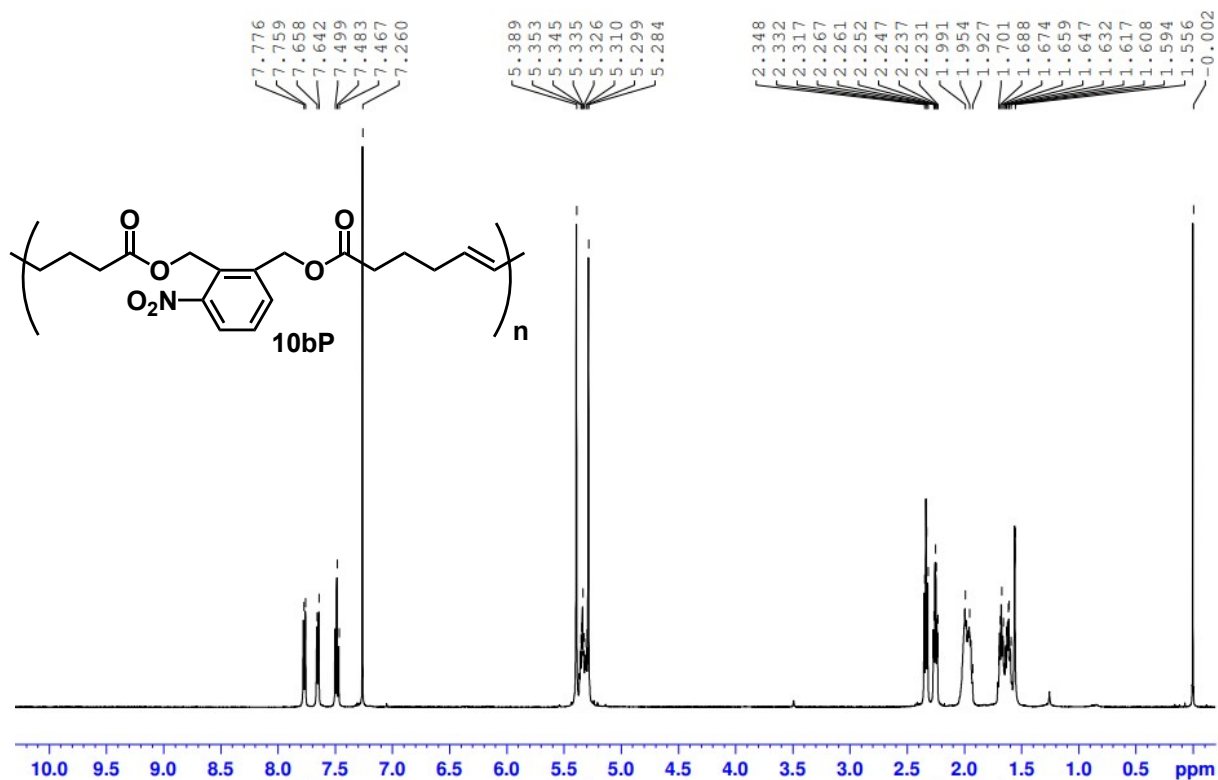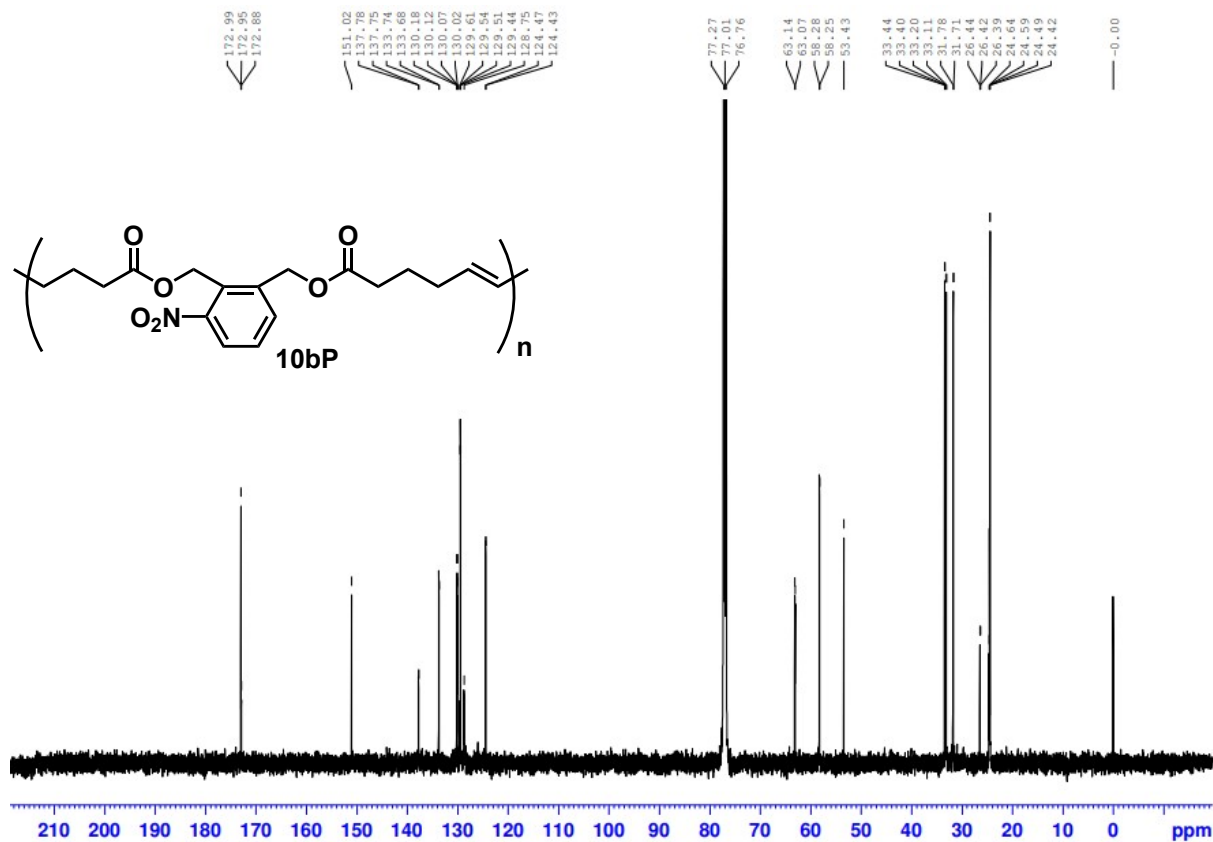

<sup>1</sup>H NMR (CDCl<sub>3</sub>, 500 MHz) and <sup>13</sup>C NMR (CDCl<sub>3</sub>, 125 MHz) spectra of compound 10bP.

## 7. Data tables for the obtained X-ray crystal structures of monomers

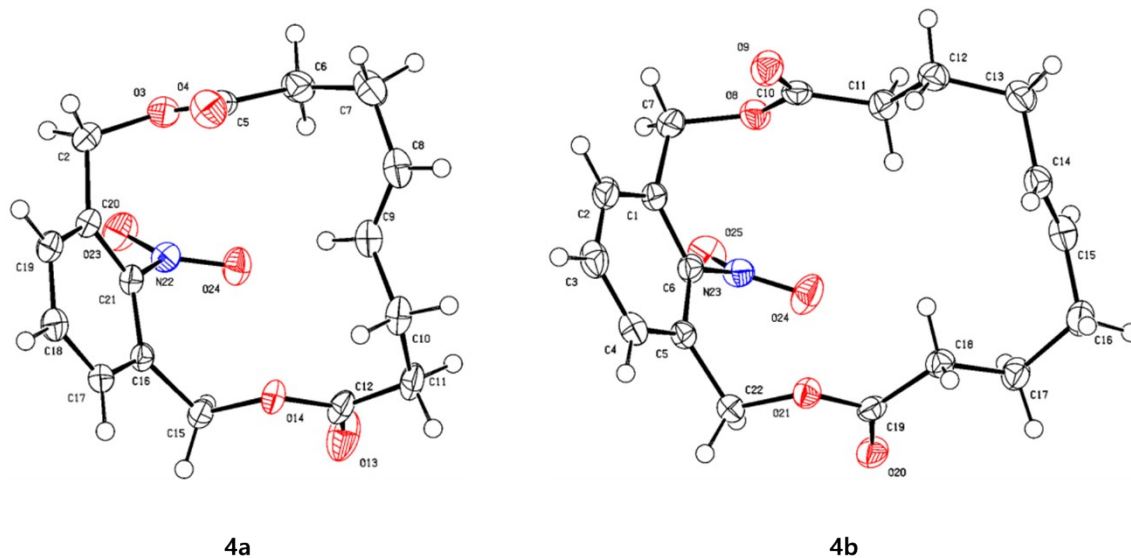

Fig. S17. X-ray structures of 4a, 4b.

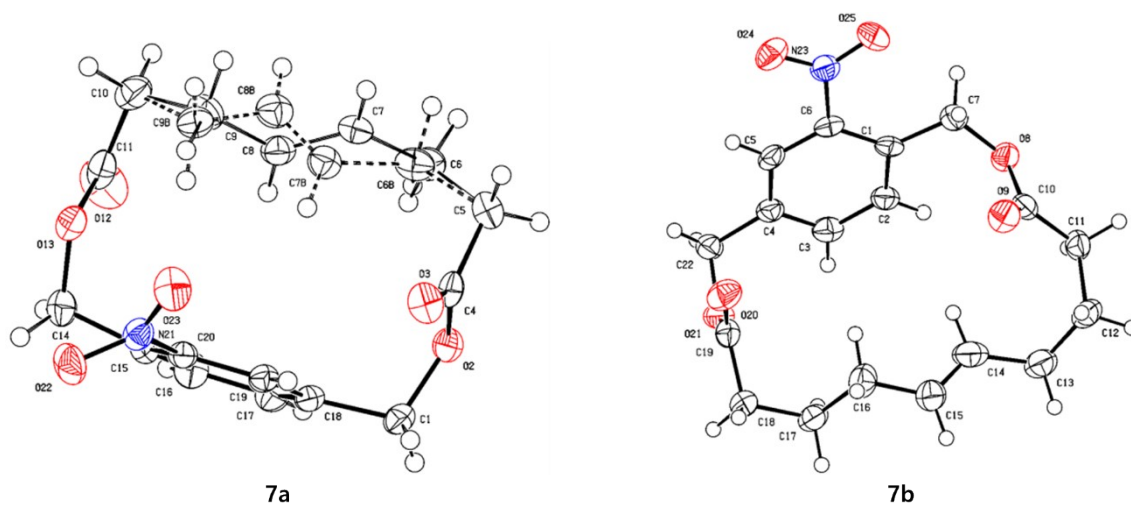

Fig. S18. X-ray structures of 7a, 7b.

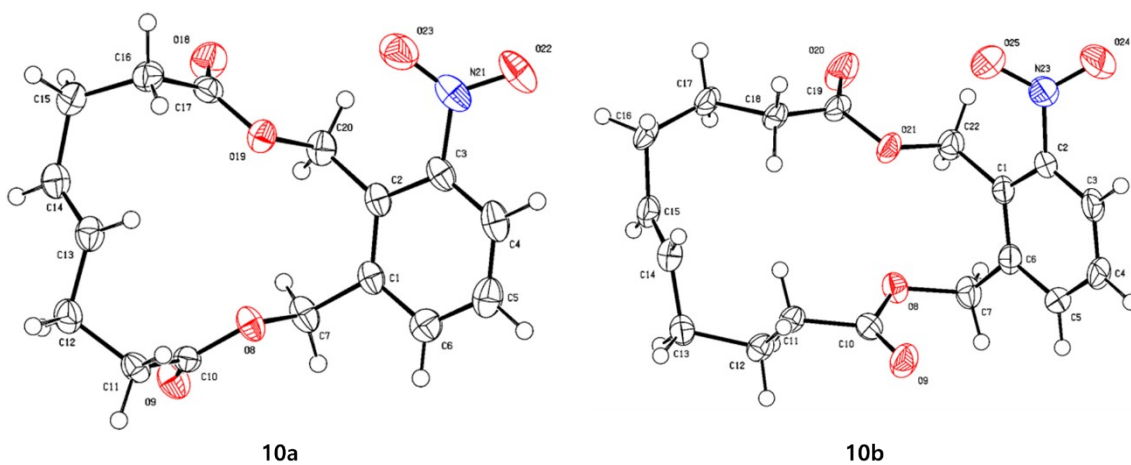

Fig. S19. X-ray structures of 10a, 10b.

**Table S8.** Crystal data and structure refinement for **4a**.

|                                              |                                                               |                              |
|----------------------------------------------|---------------------------------------------------------------|------------------------------|
| Empirical formula                            | C <sub>16</sub> H <sub>17</sub> N O <sub>6</sub>              |                              |
| Formula weight                               | 319.30                                                        |                              |
| Temperature                                  | 173(2) K                                                      |                              |
| Wavelength                                   | 0.71073 Å                                                     |                              |
| Crystal system                               | Monoclinic                                                    |                              |
| Space group                                  | <i>P</i> 2 <sub>1</sub> / <i>c</i>                            |                              |
| Unit cell dimensions                         | <i>a</i> = 12.9980(5) Å                                       | $\alpha = 90^\circ$          |
|                                              | <i>b</i> = 7.7936(3) Å                                        | $\beta = 106.5061(12)^\circ$ |
|                                              | <i>c</i> = 15.3862(6) Å                                       | $\gamma = 90^\circ$          |
| Volume                                       | 1494.41(10) Å <sup>3</sup>                                    |                              |
| Z                                            | 4                                                             |                              |
| Density (calculated)                         | 1.419 Mg/m <sup>3</sup>                                       |                              |
| Absorption coefficient                       | 0.110 mm <sup>-1</sup>                                        |                              |
| F(000)                                       | 672                                                           |                              |
| Crystal size                                 | 0.317 x 0.288 x 0.132 mm <sup>3</sup>                         |                              |
| Theta range for data collection              | 2.761 to 27.494°.                                             |                              |
| Index ranges                                 | -16 ≤ <i>h</i> ≤ 16, -10 ≤ <i>k</i> ≤ 10, -19 ≤ <i>l</i> ≤ 18 |                              |
| Reflections collected                        | 25507                                                         |                              |
| Independent reflections                      | 3360 [R(int) = 0.0714]                                        |                              |
| Completeness to theta = 25.242°              | 97.5 %                                                        |                              |
| Absorption correction                        | Semi-empirical from equivalents                               |                              |
| Max. and min. transmission                   | 0.7456 and 0.6093                                             |                              |
| Refinement method                            | Full-matrix least-squares on F <sup>2</sup>                   |                              |
| Data / restraints / parameters               | 3360 / 0 / 208                                                |                              |
| Goodness-of-fit on F <sup>2</sup>            | 1.054                                                         |                              |
| Final R indices [ <i>I</i> > 2σ( <i>I</i> )] | R1 = 0.0382, wR2 = 0.0908                                     |                              |
| R indices (all data)                         | R1 = 0.0461, wR2 = 0.0991                                     |                              |
| Largest diff. peak and hole                  | 0.240 and -0.227 e·Å <sup>-3</sup>                            |                              |

**Table S9.** Atomic coordinates (  $\times 10^4$  ) and equivalent isotropic displacement parameters (  $\text{\AA}^2 \times 10^3$  ) for **4a**.  $U(\text{eq})$  is defined as one third of the trace of the orthogonalized  $U^{ij}$  tensor.

|       | x       | y       | z       | U(eq) |
|-------|---------|---------|---------|-------|
| C(2)  | 4198(1) | 4027(2) | 7285(1) | 32(1) |
| O(3)  | 3077(1) | 4493(1) | 7045(1) | 31(1) |
| O(4)  | 3409(1) | 6845(1) | 6317(1) | 38(1) |
| C(5)  | 2776(1) | 5907(2) | 6514(1) | 29(1) |
| C(6)  | 1572(1) | 6071(2) | 6243(1) | 33(1) |
| C(7)  | 1108(1) | 7436(2) | 5535(1) | 37(1) |
| C(8)  | 1120(1) | 7054(2) | 4578(1) | 34(1) |
| C(9)  | 1452(1) | 5649(2) | 4260(1) | 30(1) |
| C(10) | 1469(1) | 5411(2) | 3292(1) | 31(1) |
| C(11) | 1008(1) | 3707(2) | 2858(1) | 32(1) |
| C(12) | 1551(1) | 2104(2) | 3309(1) | 29(1) |
| O(13) | 1125(1) | 732(1)  | 3282(1) | 49(1) |
| O(14) | 2597(1) | 2365(1) | 3739(1) | 26(1) |
| C(15) | 3184(1) | 948(2)  | 4260(1) | 25(1) |
| C(16) | 4011(1) | 1802(1) | 5023(1) | 22(1) |
| C(17) | 4993(1) | 2292(2) | 4903(1) | 25(1) |
| C(18) | 5719(1) | 3267(2) | 5545(1) | 29(1) |
| C(19) | 5461(1) | 3826(2) | 6315(1) | 29(1) |
| C(20) | 4501(1) | 3341(2) | 6474(1) | 26(1) |
| C(21) | 3816(1) | 2285(2) | 5835(1) | 23(1) |
| N(22) | 2849(1) | 1617(1) | 6043(1) | 26(1) |
| O(23) | 2994(1) | 816(1)  | 6753(1) | 37(1) |
| O(24) | 1967(1) | 1864(1) | 5501(1) | 33(1) |

**Table S10.** Bond lengths [Å] and angles [°] for **4a**.

---

|              |            |
|--------------|------------|
| C(2)-O(3)    | 1.4442(15) |
| C(2)-C(20)   | 1.5098(16) |
| C(2)-H(2A)   | 0.9900     |
| C(2)-H(2B)   | 0.9900     |
| O(3)-C(5)    | 1.3607(15) |
| O(4)-C(5)    | 1.2020(16) |
| C(5)-C(6)    | 1.5058(17) |
| C(6)-C(7)    | 1.5199(19) |
| C(6)-H(6A)   | 0.9900     |
| C(6)-H(6B)   | 0.9900     |
| C(7)-C(8)    | 1.505(2)   |
| C(7)-H(7A)   | 0.9900     |
| C(7)-H(7B)   | 0.9900     |
| C(8)-C(9)    | 1.3212(19) |
| C(8)-H(8)    | 0.9500     |
| C(9)-C(10)   | 1.5081(18) |
| C(9)-H(9)    | 0.9500     |
| C(10)-C(11)  | 1.5297(19) |
| C(10)-H(10A) | 0.9900     |
| C(10)-H(10B) | 0.9900     |
| C(11)-C(12)  | 1.5035(18) |
| C(11)-H(11A) | 0.9900     |
| C(11)-H(11B) | 0.9900     |
| C(12)-O(13)  | 1.1999(16) |
| C(12)-O(14)  | 1.3474(14) |
| O(14)-C(15)  | 1.4483(14) |
| C(15)-C(16)  | 1.5027(15) |
| C(15)-H(15A) | 0.9900     |
| C(15)-H(15B) | 0.9900     |
| C(16)-C(17)  | 1.3934(16) |
| C(16)-C(21)  | 1.3971(16) |
| C(17)-C(18)  | 1.3835(17) |
| C(17)-H(17)  | 0.9500     |
| C(18)-C(19)  | 1.3903(17) |
| C(18)-H(18)  | 0.9500     |
| C(19)-C(20)  | 1.3905(17) |

|                    |            |
|--------------------|------------|
| C(19)-H(19)        | 0.9500     |
| C(20)-C(21)        | 1.3924(16) |
| C(21)-N(22)        | 1.4760(15) |
| N(22)-O(24)        | 1.2258(13) |
| N(22)-O(23)        | 1.2264(13) |
| O(3)-C(2)-C(20)    | 111.05(9)  |
| O(3)-C(2)-H(2A)    | 109.4      |
| C(20)-C(2)-H(2A)   | 109.4      |
| O(3)-C(2)-H(2B)    | 109.4      |
| C(20)-C(2)-H(2B)   | 109.4      |
| H(2A)-C(2)-H(2B)   | 108.0      |
| C(5)-O(3)-C(2)     | 117.01(10) |
| O(4)-C(5)-O(3)     | 122.89(12) |
| O(4)-C(5)-C(6)     | 127.61(12) |
| O(3)-C(5)-C(6)     | 109.50(10) |
| C(5)-C(6)-C(7)     | 115.28(11) |
| C(5)-C(6)-H(6A)    | 108.5      |
| C(7)-C(6)-H(6A)    | 108.5      |
| C(5)-C(6)-H(6B)    | 108.5      |
| C(7)-C(6)-H(6B)    | 108.5      |
| H(6A)-C(6)-H(6B)   | 107.5      |
| C(8)-C(7)-C(6)     | 116.83(11) |
| C(8)-C(7)-H(7A)    | 108.1      |
| C(6)-C(7)-H(7A)    | 108.1      |
| C(8)-C(7)-H(7B)    | 108.1      |
| C(6)-C(7)-H(7B)    | 108.1      |
| H(7A)-C(7)-H(7B)   | 107.3      |
| C(9)-C(8)-C(7)     | 128.35(12) |
| C(9)-C(8)-H(8)     | 115.8      |
| C(7)-C(8)-H(8)     | 115.8      |
| C(8)-C(9)-C(10)    | 124.47(12) |
| C(8)-C(9)-H(9)     | 117.8      |
| C(10)-C(9)-H(9)    | 117.8      |
| C(9)-C(10)-C(11)   | 115.14(11) |
| C(9)-C(10)-H(10A)  | 108.5      |
| C(11)-C(10)-H(10A) | 108.5      |
| C(9)-C(10)-H(10B)  | 108.5      |

|                     |            |
|---------------------|------------|
| C(11)-C(10)-H(10B)  | 108.5      |
| H(10A)-C(10)-H(10B) | 107.5      |
| C(12)-C(11)-C(10)   | 116.46(10) |
| C(12)-C(11)-H(11A)  | 108.2      |
| C(10)-C(11)-H(11A)  | 108.2      |
| C(12)-C(11)-H(11B)  | 108.2      |
| C(10)-C(11)-H(11B)  | 108.2      |
| H(11A)-C(11)-H(11B) | 107.3      |
| O(13)-C(12)-O(14)   | 122.87(12) |
| O(13)-C(12)-C(11)   | 124.97(11) |
| O(14)-C(12)-C(11)   | 112.14(10) |
| C(12)-O(14)-C(15)   | 117.20(9)  |
| O(14)-C(15)-C(16)   | 104.06(9)  |
| O(14)-C(15)-H(15A)  | 110.9      |
| C(16)-C(15)-H(15A)  | 110.9      |
| O(14)-C(15)-H(15B)  | 110.9      |
| C(16)-C(15)-H(15B)  | 110.9      |
| H(15A)-C(15)-H(15B) | 109.0      |
| C(17)-C(16)-C(21)   | 116.84(10) |
| C(17)-C(16)-C(15)   | 119.78(10) |
| C(21)-C(16)-C(15)   | 123.12(10) |
| C(18)-C(17)-C(16)   | 121.35(11) |
| C(18)-C(17)-H(17)   | 119.3      |
| C(16)-C(17)-H(17)   | 119.3      |
| C(17)-C(18)-C(19)   | 120.03(11) |
| C(17)-C(18)-H(18)   | 120.0      |
| C(19)-C(18)-H(18)   | 120.0      |
| C(18)-C(19)-C(20)   | 120.67(11) |
| C(18)-C(19)-H(19)   | 119.7      |
| C(20)-C(19)-H(19)   | 119.7      |
| C(19)-C(20)-C(21)   | 117.61(11) |
| C(19)-C(20)-C(2)    | 120.47(11) |
| C(21)-C(20)-C(2)    | 121.83(11) |
| C(20)-C(21)-C(16)   | 123.22(11) |
| C(20)-C(21)-N(22)   | 118.01(10) |
| C(16)-C(21)-N(22)   | 118.76(10) |
| O(24)-N(22)-O(23)   | 124.29(10) |
| O(24)-N(22)-C(21)   | 119.10(9)  |

O(23)-N(22)-C(21)

116.60(10)

---

Symmetry transformations used to generate equivalent atoms:



**Table S11.** Anisotropic displacement parameters (  $\text{\AA}^2 \times 10^3$  ) for **4a**. The anisotropic displacement factor exponent takes the form:  $-2\pi^2[ h^2a^2U^{11} + \dots + 2 h k a^* b^* U^{12} ]$

|       | U <sup>11</sup> | U <sup>22</sup> | U <sup>33</sup> | U <sup>23</sup> | U <sup>13</sup> | U <sup>12</sup> |
|-------|-----------------|-----------------|-----------------|-----------------|-----------------|-----------------|
| C(2)  | 29(1)           | 42(1)           | 22(1)           | -5(1)           | 3(1)            | 4(1)            |
| O(3)  | 30(1)           | 37(1)           | 27(1)           | -1(1)           | 10(1)           | 3(1)            |
| O(4)  | 31(1)           | 39(1)           | 45(1)           | 1(1)            | 14(1)           | -4(1)           |
| C(5)  | 30(1)           | 31(1)           | 26(1)           | -6(1)           | 10(1)           | 0(1)            |
| C(6)  | 29(1)           | 38(1)           | 35(1)           | -3(1)           | 13(1)           | 1(1)            |
| C(7)  | 30(1)           | 32(1)           | 50(1)           | -2(1)           | 11(1)           | 4(1)            |
| C(8)  | 26(1)           | 31(1)           | 41(1)           | 8(1)            | 5(1)            | 2(1)            |
| C(9)  | 24(1)           | 31(1)           | 32(1)           | 7(1)            | 4(1)            | 1(1)            |
| C(10) | 23(1)           | 37(1)           | 31(1)           | 10(1)           | 2(1)            | 1(1)            |
| C(11) | 19(1)           | 44(1)           | 26(1)           | 4(1)            | -2(1)           | 1(1)            |
| C(12) | 22(1)           | 39(1)           | 21(1)           | 0(1)            | -1(1)           | -5(1)           |
| O(13) | 36(1)           | 44(1)           | 53(1)           | 8(1)            | -11(1)          | -16(1)          |
| O(14) | 20(1)           | 30(1)           | 24(1)           | 3(1)            | -2(1)           | -1(1)           |
| C(15) | 24(1)           | 26(1)           | 21(1)           | 0(1)            | 1(1)            | 1(1)            |
| C(16) | 22(1)           | 22(1)           | 20(1)           | 2(1)            | 2(1)            | 3(1)            |
| C(17) | 23(1)           | 29(1)           | 22(1)           | 0(1)            | 4(1)            | 5(1)            |
| C(18) | 19(1)           | 35(1)           | 31(1)           | -1(1)           | 4(1)            | 1(1)            |
| C(19) | 20(1)           | 34(1)           | 28(1)           | -5(1)           | -1(1)           | -1(1)           |
| C(20) | 24(1)           | 30(1)           | 20(1)           | -1(1)           | 1(1)            | 3(1)            |
| C(21) | 20(1)           | 25(1)           | 21(1)           | 3(1)            | 2(1)            | 2(1)            |
| N(22) | 27(1)           | 27(1)           | 23(1)           | 1(1)            | 6(1)            | -1(1)           |
| O(23) | 43(1)           | 40(1)           | 28(1)           | 10(1)           | 11(1)           | -2(1)           |
| O(24) | 22(1)           | 41(1)           | 33(1)           | 4(1)            | 3(1)            | -2(1)           |

**Table S12.** Hydrogen coordinates (  $\times 10^4$  ) and isotropic displacement parameters (  $\text{\AA}^2 \times 10^3$  ) for **4a**.

|        | x        | y      | z | U(eq) |
|--------|----------|--------|---|-------|
| H(2A)  | 43453144 | 776739 |   |       |
| H(2B)  | 46425047 | 752639 |   |       |
| H(6A)  | 13476331 | 679340 |   |       |
| H(6B)  | 12564949 | 600840 |   |       |
| H(7A)  | 3567647  | 553045 |   |       |
| H(7B)  | 15108514 | 572845 |   |       |
| H(8)   | 8537938  | 414841 |   |       |
| H(9)   | 16984726 | 467036 |   |       |
| H(10A) | 22205506 | 326938 |   |       |
| H(10B) | 10576358 | 292338 |   |       |
| H(11A) | 2433653  | 284338 |   |       |
| H(11B) | 10373706 | 222138 |   |       |
| H(15A) | 3530242  | 388730 |   |       |
| H(15B) | 2704210  | 449530 |   |       |
| H(17)  | 51671950 | 436930 |   |       |
| H(18)  | 63943555 | 545935 |   |       |
| H(19)  | 59464547 | 673835 |   |       |

**Table S13.** Crystal data and structure refinement for **4b**.

|                                              |                                                               |                         |
|----------------------------------------------|---------------------------------------------------------------|-------------------------|
| Empirical formula                            | C <sub>18</sub> H <sub>21</sub> N O <sub>6</sub>              |                         |
| Formula weight                               | 347.36                                                        |                         |
| Temperature                                  | 173(2) K                                                      |                         |
| Wavelength                                   | 0.71073 Å                                                     |                         |
| Crystal system                               | Triclinic                                                     |                         |
| Space group                                  | <i>P</i> -1                                                   |                         |
| Unit cell dimensions                         | <i>a</i> = 8.1602(3) Å                                        | $\alpha$ = 88.2151(14)° |
|                                              | <i>b</i> = 10.1021(4) Å                                       | $\beta$ = 69.4794(14)°  |
|                                              | <i>c</i> = 11.5212(4) Å                                       | $\gamma$ = 72.0806(13)° |
| Volume                                       | 843.20(5) Å <sup>3</sup>                                      |                         |
| Z                                            | 2                                                             |                         |
| Density (calculated)                         | 1.368 Mg/m <sup>3</sup>                                       |                         |
| Absorption coefficient                       | 0.103 mm <sup>-1</sup>                                        |                         |
| F(000)                                       | 368                                                           |                         |
| Crystal size                                 | 0.243 x 0.191 x 0.077 mm <sup>3</sup>                         |                         |
| Theta range for data collection              | 2.724 to 27.513°.                                             |                         |
| Index ranges                                 | -10 ≤ <i>h</i> ≤ 10, -13 ≤ <i>k</i> ≤ 13, -14 ≤ <i>l</i> ≤ 14 |                         |
| Reflections collected                        | 20654                                                         |                         |
| Independent reflections                      | 3808 [R(int) = 0.0650]                                        |                         |
| Completeness to theta = 25.242°              | 98.3 %                                                        |                         |
| Absorption correction                        | Semi-empirical from equivalents                               |                         |
| Max. and min. transmission                   | 0.7456 and 0.5000                                             |                         |
| Refinement method                            | Full-matrix least-squares on F <sup>2</sup>                   |                         |
| Data / restraints / parameters               | 3808 / 0 / 226                                                |                         |
| Goodness-of-fit on F <sup>2</sup>            | 1.051                                                         |                         |
| Final R indices [ <i>I</i> > 2σ( <i>I</i> )] | R1 = 0.0392, wR2 = 0.0935                                     |                         |
| R indices (all data)                         | R1 = 0.0489, wR2 = 0.1027                                     |                         |
| Largest diff. peak and hole                  | 0.281 and -0.189 e·Å <sup>-3</sup>                            |                         |

**Table S14.** Atomic coordinates (  $\times 10^4$  ) and equivalent isotropic displacement parameters (  $\text{\AA}^2 \times 10^3$  ) for **4b**.  $U(\text{eq})$  is defined as one third of the trace of the orthogonalized  $U^{ij}$  tensor.

|       | x       | y       | z        | U(eq) |
|-------|---------|---------|----------|-------|
| C(1)  | 6023(2) | 299(1)  | 6130(1)  | 26(1) |
| C(2)  | 7337(2) | -824(1) | 5315(1)  | 32(1) |
| C(3)  | 8574(2) | -604(1) | 4208(1)  | 34(1) |
| C(4)  | 8573(2) | 737(1)  | 3918(1)  | 29(1) |
| C(5)  | 7303(2) | 1895(1) | 4713(1)  | 23(1) |
| C(6)  | 6015(2) | 1641(1) | 5787(1)  | 23(1) |
| C(7)  | 4752(2) | 58(1)   | 7370(1)  | 32(1) |
| O(8)  | 4758(1) | 917(1)  | 8355(1)  | 29(1) |
| O(9)  | 7466(1) | -610(1) | 8279(1)  | 35(1) |
| C(10) | 6306(2) | 509(1)  | 8640(1)  | 25(1) |
| C(11) | 6368(2) | 1638(1) | 9422(1)  | 28(1) |
| C(12) | 8016(2) | 1201(1) | 9838(1)  | 29(1) |
| C(13) | 8173(2) | 2405(2) | 10524(1) | 33(1) |
| C(14) | 8833(2) | 3435(1) | 9673(1)  | 30(1) |
| C(15) | 7884(2) | 4752(1) | 9655(1)  | 31(1) |
| C(16) | 8598(2) | 5756(1) | 8794(1)  | 33(1) |
| C(17) | 7878(2) | 6004(1) | 7717(1)  | 30(1) |
| C(18) | 8623(2) | 4706(1) | 6832(1)  | 26(1) |
| C(19) | 7796(2) | 4821(1) | 5845(1)  | 24(1) |
| O(20) | 6665(1) | 5832(1) | 5691(1)  | 33(1) |
| O(21) | 8499(1) | 3593(1) | 5137(1)  | 26(1) |
| C(22) | 7466(2) | 3321(1) | 4424(1)  | 26(1) |
| N(23) | 4545(2) | 2835(1) | 6621(1)  | 27(1) |
| O(24) | 4996(1) | 3722(1) | 7019(1)  | 41(1) |
| O(25) | 2952(1) | 2866(1) | 6865(1)  | 37(1) |

**Table S15.** Bond lengths [Å] and angles [°] for **4b**.

---

|              |            |
|--------------|------------|
| C(1)-C(2)    | 1.3894(19) |
| C(1)-C(6)    | 1.3996(16) |
| C(1)-C(7)    | 1.5065(18) |
| C(2)-C(3)    | 1.383(2)   |
| C(2)-H(2)    | 0.9500     |
| C(3)-C(4)    | 1.3853(19) |
| C(3)-H(3)    | 0.9500     |
| C(4)-C(5)    | 1.3917(17) |
| C(4)-H(4)    | 0.9500     |
| C(5)-C(6)    | 1.3908(17) |
| C(5)-C(22)   | 1.5039(16) |
| C(6)-N(23)   | 1.4803(15) |
| C(7)-O(8)    | 1.4530(15) |
| C(7)-H(7A)   | 0.9900     |
| C(7)-H(7B)   | 0.9900     |
| O(8)-C(10)   | 1.3545(15) |
| O(9)-C(10)   | 1.2010(16) |
| C(10)-C(11)  | 1.4992(17) |
| C(11)-C(12)  | 1.5181(17) |
| C(11)-H(11A) | 0.9900     |
| C(11)-H(11B) | 0.9900     |
| C(12)-C(13)  | 1.5332(18) |
| C(12)-H(12A) | 0.9900     |
| C(12)-H(12B) | 0.9900     |
| C(13)-C(14)  | 1.4985(19) |
| C(13)-H(13A) | 0.9900     |
| C(13)-H(13B) | 0.9900     |
| C(14)-C(15)  | 1.3212(19) |
| C(14)-H(14)  | 0.9500     |
| C(15)-C(16)  | 1.500(2)   |
| C(15)-H(15)  | 0.9500     |
| C(16)-C(17)  | 1.5336(18) |
| C(16)-H(16A) | 0.9900     |
| C(16)-H(16B) | 0.9900     |
| C(17)-C(18)  | 1.5123(17) |
| C(17)-H(17A) | 0.9900     |

|                  |            |
|------------------|------------|
| C(17)-H(17B)     | 0.9900     |
| C(18)-C(19)      | 1.4984(17) |
| C(18)-H(18A)     | 0.9900     |
| C(18)-H(18B)     | 0.9900     |
| C(19)-O(20)      | 1.2036(15) |
| C(19)-O(21)      | 1.3528(15) |
| O(21)-C(22)      | 1.4500(14) |
| C(22)-H(22A)     | 0.9900     |
| C(22)-H(22B)     | 0.9900     |
| N(23)-O(25)      | 1.2208(14) |
| N(23)-O(24)      | 1.2217(14) |
|                  |            |
| C(2)-C(1)-C(6)   | 117.44(12) |
| C(2)-C(1)-C(7)   | 120.46(11) |
| C(6)-C(1)-C(7)   | 121.98(12) |
| C(3)-C(2)-C(1)   | 120.55(12) |
| C(3)-C(2)-H(2)   | 119.7      |
| C(1)-C(2)-H(2)   | 119.7      |
| C(2)-C(3)-C(4)   | 120.53(12) |
| C(2)-C(3)-H(3)   | 119.7      |
| C(4)-C(3)-H(3)   | 119.7      |
| C(3)-C(4)-C(5)   | 121.04(12) |
| C(3)-C(4)-H(4)   | 119.5      |
| C(5)-C(4)-H(4)   | 119.5      |
| C(6)-C(5)-C(4)   | 116.97(11) |
| C(6)-C(5)-C(22)  | 123.63(11) |
| C(4)-C(5)-C(22)  | 119.26(11) |
| C(5)-C(6)-C(1)   | 123.32(11) |
| C(5)-C(6)-N(23)  | 119.36(10) |
| C(1)-C(6)-N(23)  | 117.31(11) |
| O(8)-C(7)-C(1)   | 109.95(10) |
| O(8)-C(7)-H(7A)  | 109.7      |
| C(1)-C(7)-H(7A)  | 109.7      |
| O(8)-C(7)-H(7B)  | 109.7      |
| C(1)-C(7)-H(7B)  | 109.7      |
| H(7A)-C(7)-H(7B) | 108.2      |
| C(10)-O(8)-C(7)  | 115.76(10) |
| O(9)-C(10)-O(8)  | 122.93(11) |

|                     |            |
|---------------------|------------|
| O(9)-C(10)-C(11)    | 125.96(12) |
| O(8)-C(10)-C(11)    | 111.10(11) |
| C(10)-C(11)-C(12)   | 113.25(11) |
| C(10)-C(11)-H(11A)  | 108.9      |
| C(12)-C(11)-H(11A)  | 108.9      |
| C(10)-C(11)-H(11B)  | 108.9      |
| C(12)-C(11)-H(11B)  | 108.9      |
| H(11A)-C(11)-H(11B) | 107.7      |
| C(11)-C(12)-C(13)   | 112.80(11) |
| C(11)-C(12)-H(12A)  | 109.0      |
| C(13)-C(12)-H(12A)  | 109.0      |
| C(11)-C(12)-H(12B)  | 109.0      |
| C(13)-C(12)-H(12B)  | 109.0      |
| H(12A)-C(12)-H(12B) | 107.8      |
| C(14)-C(13)-C(12)   | 112.93(11) |
| C(14)-C(13)-H(13A)  | 109.0      |
| C(12)-C(13)-H(13A)  | 109.0      |
| C(14)-C(13)-H(13B)  | 109.0      |
| C(12)-C(13)-H(13B)  | 109.0      |
| H(13A)-C(13)-H(13B) | 107.8      |
| C(15)-C(14)-C(13)   | 126.59(13) |
| C(15)-C(14)-H(14)   | 116.7      |
| C(13)-C(14)-H(14)   | 116.7      |
| C(14)-C(15)-C(16)   | 125.06(13) |
| C(14)-C(15)-H(15)   | 117.5      |
| C(16)-C(15)-H(15)   | 117.5      |
| C(15)-C(16)-C(17)   | 113.27(11) |
| C(15)-C(16)-H(16A)  | 108.9      |
| C(17)-C(16)-H(16A)  | 108.9      |
| C(15)-C(16)-H(16B)  | 108.9      |
| C(17)-C(16)-H(16B)  | 108.9      |
| H(16A)-C(16)-H(16B) | 107.7      |
| C(18)-C(17)-C(16)   | 111.53(11) |
| C(18)-C(17)-H(17A)  | 109.3      |
| C(16)-C(17)-H(17A)  | 109.3      |
| C(18)-C(17)-H(17B)  | 109.3      |
| C(16)-C(17)-H(17B)  | 109.3      |
| H(17A)-C(17)-H(17B) | 108.0      |

|                     |            |
|---------------------|------------|
| C(19)-C(18)-C(17)   | 114.25(10) |
| C(19)-C(18)-H(18A)  | 108.7      |
| C(17)-C(18)-H(18A)  | 108.7      |
| C(19)-C(18)-H(18B)  | 108.7      |
| C(17)-C(18)-H(18B)  | 108.7      |
| H(18A)-C(18)-H(18B) | 107.6      |
| O(20)-C(19)-O(21)   | 123.96(11) |
| O(20)-C(19)-C(18)   | 126.48(11) |
| O(21)-C(19)-C(18)   | 109.56(10) |
| C(19)-O(21)-C(22)   | 117.81(9)  |
| O(21)-C(22)-C(5)    | 105.82(9)  |
| O(21)-C(22)-H(22A)  | 110.6      |
| C(5)-C(22)-H(22A)   | 110.6      |
| O(21)-C(22)-H(22B)  | 110.6      |
| C(5)-C(22)-H(22B)   | 110.6      |
| H(22A)-C(22)-H(22B) | 108.7      |
| O(25)-N(23)-O(24)   | 124.30(11) |
| O(25)-N(23)-C(6)    | 117.24(10) |
| O(24)-N(23)-C(6)    | 118.45(10) |

---

Symmetry transformations used to generate equivalent atoms:



**Table S16.** Anisotropic displacement parameters (  $\text{\AA}^2 \times 10^3$  ) for **4b**. The anisotropic displacement factor exponent takes the form:  $-2\pi^2[ h^2a^*2U^{11} + \dots + 2 h k a^* b^* U^{12} ]$

|       | U <sup>11</sup> | U <sup>22</sup> | U <sup>33</sup> | U <sup>23</sup> | U <sup>13</sup> | U <sup>12</sup> |
|-------|-----------------|-----------------|-----------------|-----------------|-----------------|-----------------|
| C(1)  | 33(1)           | 27(1)           | 28(1)           | 6(1)            | -19(1)          | -14(1)          |
| C(2)  | 46(1)           | 21(1)           | 38(1)           | 4(1)            | -27(1)          | -10(1)          |
| C(3)  | 39(1)           | 26(1)           | 35(1)           | -6(1)           | -19(1)          | 0(1)            |
| C(4)  | 30(1)           | 32(1)           | 24(1)           | -1(1)           | -12(1)          | -6(1)           |
| C(5)  | 26(1)           | 24(1)           | 23(1)           | 3(1)            | -13(1)          | -8(1)           |
| C(6)  | 25(1)           | 22(1)           | 25(1)           | 1(1)            | -12(1)          | -7(1)           |
| C(7)  | 42(1)           | 34(1)           | 34(1)           | 11(1)           | -21(1)          | -24(1)          |
| O(8)  | 30(1)           | 35(1)           | 28(1)           | 7(1)            | -13(1)          | -15(1)          |
| O(9)  | 39(1)           | 28(1)           | 40(1)           | 1(1)            | -18(1)          | -8(1)           |
| C(10) | 27(1)           | 29(1)           | 23(1)           | 10(1)           | -9(1)           | -14(1)          |
| C(11) | 29(1)           | 28(1)           | 29(1)           | 3(1)            | -12(1)          | -9(1)           |
| C(12) | 31(1)           | 31(1)           | 29(1)           | 8(1)            | -14(1)          | -12(1)          |
| C(13) | 37(1)           | 39(1)           | 28(1)           | 5(1)            | -16(1)          | -14(1)          |
| C(14) | 30(1)           | 35(1)           | 29(1)           | 2(1)            | -14(1)          | -13(1)          |
| C(15) | 32(1)           | 35(1)           | 30(1)           | -2(1)           | -15(1)          | -10(1)          |
| C(16) | 39(1)           | 28(1)           | 39(1)           | 0(1)            | -22(1)          | -11(1)          |
| C(17) | 35(1)           | 23(1)           | 37(1)           | 2(1)            | -19(1)          | -8(1)           |
| C(18) | 27(1)           | 22(1)           | 29(1)           | 4(1)            | -12(1)          | -8(1)           |
| C(19) | 26(1)           | 22(1)           | 27(1)           | 7(1)            | -10(1)          | -12(1)          |
| O(20) | 41(1)           | 23(1)           | 42(1)           | 8(1)            | -25(1)          | -9(1)           |
| O(21) | 26(1)           | 25(1)           | 29(1)           | 2(1)            | -12(1)          | -9(1)           |
| C(22) | 31(1)           | 28(1)           | 24(1)           | 5(1)            | -13(1)          | -12(1)          |
| N(23) | 27(1)           | 25(1)           | 26(1)           | 4(1)            | -7(1)           | -8(1)           |
| O(24) | 42(1)           | 32(1)           | 41(1)           | -11(1)          | -1(1)           | -17(1)          |
| O(25) | 24(1)           | 45(1)           | 39(1)           | 4(1)            | -10(1)          | -8(1)           |

**Table S17.** Hydrogen coordinates (  $\times 10^4$  ) and isotropic displacement parameters (  $\text{\AA}^2 \times 10^3$  ) for **4b**.

|        | x         | y       | z | U(eq) |
|--------|-----------|---------|---|-------|
| H(2)   | 7386-1750 | 551939  |   |       |
| H(3)   | 9430-1379 | 364240  |   |       |
| H(4)   | 9453869   | 316434  |   |       |
| H(7A)  | 3484295   | 736438  |   |       |
| H(7B)  | 5162-940  | 752138  |   |       |
| H(11A) | 52221917  | 1016733 |   |       |
| H(11B) | 64062465  | 894133  |   |       |
| H(12A) | 9156832   | 909935  |   |       |
| H(12B) | 7910439   | 1039235 |   |       |
| H(13A) | 69512897  | 1115639 |   |       |
| H(13B) | 90392018  | 1096639 |   |       |
| H(14)  | 100593108 | 908735  |   |       |
| H(15)  | 66535089  | 1023338 |   |       |
| H(16A) | 99635391  | 844939  |   |       |
| H(16B) | 82386660  | 927639  |   |       |
| H(17A) | 65136292  | 805436  |   |       |
| H(17B) | 82476773  | 725736  |   |       |
| H(18A) | 99754490  | 642631  |   |       |
| H(18B) | 83973913  | 731931  |   |       |
| H(22A) | 81253338  | 352431  |   |       |
| H(22B) | 62294031  | 467131  |   |       |

**Table S18.** Crystal data and structure refinement for **7a**.

|                                              |                                                               |                             |
|----------------------------------------------|---------------------------------------------------------------|-----------------------------|
| Empirical formula                            | C <sub>16</sub> H <sub>17</sub> N O <sub>6</sub>              |                             |
| Formula weight                               | 319.30                                                        |                             |
| Temperature                                  | 173(2) K                                                      |                             |
| Wavelength                                   | 0.71073 Å                                                     |                             |
| Crystal system                               | Monoclinic                                                    |                             |
| Space group                                  | <i>P</i> 2 <sub>1</sub> / <i>n</i>                            |                             |
| Unit cell dimensions                         | <i>a</i> = 7.8712(4) Å                                        | $\alpha = 90^\circ$         |
|                                              | <i>b</i> = 16.4752(7) Å                                       | $\beta = 91.5968(14)^\circ$ |
|                                              | <i>c</i> = 11.7570(5) Å                                       | $\gamma = 90^\circ$         |
| Volume                                       | 1524.05(12) Å <sup>3</sup>                                    |                             |
| Z                                            | 4                                                             |                             |
| Density (calculated)                         | 1.392 Mg/m <sup>3</sup>                                       |                             |
| Absorption coefficient                       | 0.107 mm <sup>-1</sup>                                        |                             |
| F(000)                                       | 672                                                           |                             |
| Crystal size                                 | 0.291 x 0.183 x 0.096 mm <sup>3</sup>                         |                             |
| Theta range for data collection              | 2.869 to 27.499°.                                             |                             |
| Index ranges                                 | -10 ≤ <i>h</i> ≤ 10, -21 ≤ <i>k</i> ≤ 21, -15 ≤ <i>l</i> ≤ 15 |                             |
| Reflections collected                        | 20523                                                         |                             |
| Independent reflections                      | 3447 [R(int) = 0.0547]                                        |                             |
| Completeness to theta = 25.242°              | 98.3 %                                                        |                             |
| Absorption correction                        | Semi-empirical from equivalents                               |                             |
| Max. and min. transmission                   | 0.7456 and 0.6508                                             |                             |
| Refinement method                            | Full-matrix least-squares on F <sup>2</sup>                   |                             |
| Data / restraints / parameters               | 3447 / 148 / 245                                              |                             |
| Goodness-of-fit on F <sup>2</sup>            | 1.042                                                         |                             |
| Final R indices [ <i>I</i> > 2σ( <i>I</i> )] | R1 = 0.0369, wR2 = 0.0841                                     |                             |
| R indices (all data)                         | R1 = 0.0495, wR2 = 0.0932                                     |                             |
| Largest diff. peak and hole                  | 0.242 and -0.201 e.Å <sup>-3</sup>                            |                             |

**Table S19.** Atomic coordinates (  $\times 10^4$  ) and equivalent isotropic displacement parameters (  $\text{\AA}^2 \times 10^3$  ) for **7a**.  $U(\text{eq})$  is defined as one third of the trace of the orthogonalized  $U_{ij}$  tensor.

|       | x        | y        | z        | U(eq) |
|-------|----------|----------|----------|-------|
| C(1)  | 4152(2)  | 5527(1)  | 6452(1)  | 31(1) |
| O(2)  | 5914(1)  | 5280(1)  | 6314(1)  | 30(1) |
| O(3)  | 6610(1)  | 5785(1)  | 8042(1)  | 36(1) |
| C(4)  | 7034(2)  | 5499(1)  | 7150(1)  | 27(1) |
| C(5)  | 8819(2)  | 5359(1)  | 6793(1)  | 32(1) |
| C(6)  | 9330(4)  | 5983(1)  | 5888(2)  | 31(1) |
| C(7)  | 9542(2)  | 6821(1)  | 6375(1)  | 29(1) |
| C(8)  | 8630(3)  | 7462(1)  | 6055(1)  | 30(1) |
| C(9)  | 8914(4)  | 8312(2)  | 6503(2)  | 35(1) |
| C(6B) | 9240(50) | 6128(10) | 6080(20) | 33(3) |
| C(7B) | 8700(30) | 7012(11) | 6317(16) | 30(2) |
| C(8B) | 9380(30) | 7618(13) | 6034(17) | 34(2) |
| C(9B) | 8650(60) | 8387(13) | 6586(19) | 31(3) |
| C(10) | 8820(2)  | 8967(1)  | 5565(1)  | 37(1) |
| C(11) | 7110(2)  | 8976(1)  | 4969(1)  | 32(1) |
| O(12) | 6834(2)  | 8817(1)  | 3985(1)  | 53(1) |
| O(13) | 5866(1)  | 9168(1)  | 5692(1)  | 29(1) |
| C(14) | 4139(2)  | 8961(1)  | 5317(1)  | 32(1) |
| C(15) | 3883(2)  | 8080(1)  | 5613(1)  | 25(1) |
| C(16) | 3748(2)  | 7491(1)  | 4770(1)  | 31(1) |
| C(17) | 3785(2)  | 6669(1)  | 5039(1)  | 30(1) |
| C(18) | 3973(1)  | 6413(1)  | 6159(1)  | 25(1) |
| C(19) | 4077(1)  | 6991(1)  | 7021(1)  | 24(1) |
| C(20) | 4015(1)  | 7803(1)  | 6732(1)  | 22(1) |
| N(21) | 4142(1)  | 8380(1)  | 7687(1)  | 27(1) |
| O(22) | 3118(1)  | 8941(1)  | 7714(1)  | 41(1) |
| O(23) | 5255(1)  | 8263(1)  | 8414(1)  | 39(1) |

**Table S20.** Bond lengths [Å] and angles [°] for **7a**.

---

|              |            |
|--------------|------------|
| C(1)-O(2)    | 1.4581(15) |
| C(1)-C(18)   | 1.5062(16) |
| C(1)-H(1A)   | 0.9900     |
| C(1)-H(1B)   | 0.9900     |
| O(2)-C(4)    | 1.3510(15) |
| O(3)-C(4)    | 1.2052(15) |
| C(4)-C(5)    | 1.4958(18) |
| C(5)-C(6)    | 1.540(2)   |
| C(5)-C(6B)   | 1.558(10)  |
| C(5)-H(5A)   | 0.9900     |
| C(5)-H(5B)   | 0.9900     |
| C(6)-C(7)    | 1.503(2)   |
| C(6)-H(6A)   | 0.9900     |
| C(6)-H(6B)   | 0.9900     |
| C(7)-C(8)    | 1.324(3)   |
| C(7)-H(7)    | 0.9500     |
| C(8)-C(9)    | 1.511(3)   |
| C(8)-H(8)    | 0.9500     |
| C(9)-C(10)   | 1.543(2)   |
| C(9)-H(9A)   | 0.9900     |
| C(9)-H(9B)   | 0.9900     |
| C(6B)-C(7B)  | 1.542(10)  |
| C(6B)-H(6BA) | 0.9900     |
| C(6B)-H(6BB) | 0.9900     |
| C(7B)-C(8B)  | 1.18(3)    |
| C(7B)-H(7B)  | 0.9500     |
| C(8B)-C(9B)  | 1.539(10)  |
| C(8B)-H(8B)  | 0.9500     |
| C(9B)-C(10)  | 1.542(10)  |
| C(9B)-H(9BA) | 0.9900     |
| C(9B)-H(9BB) | 0.9900     |
| C(10)-C(11)  | 1.500(2)   |
| C(10)-H(10A) | 0.9900     |
| C(10)-H(10B) | 0.9900     |
| C(11)-O(12)  | 1.1995(17) |
| C(11)-O(13)  | 1.3522(15) |

|              |            |
|--------------|------------|
| O(13)-C(14)  | 1.4582(16) |
| C(14)-C(15)  | 1.5074(16) |
| C(14)-H(14A) | 0.9900     |
| C(14)-H(14B) | 0.9900     |
| C(15)-C(16)  | 1.3896(17) |
| C(15)-C(20)  | 1.3938(16) |
| C(16)-C(17)  | 1.3901(18) |
| C(16)-H(16)  | 0.9500     |
| C(17)-C(18)  | 1.3867(18) |
| C(17)-H(17)  | 0.9500     |
| C(18)-C(19)  | 1.3917(16) |
| C(19)-C(20)  | 1.3799(16) |
| C(19)-H(19)  | 0.9500     |
| C(20)-N(21)  | 1.4728(14) |
| N(21)-O(23)  | 1.2226(14) |
| N(21)-O(22)  | 1.2269(13) |

|                  |            |
|------------------|------------|
| O(2)-C(1)-C(18)  | 109.18(9)  |
| O(2)-C(1)-H(1A)  | 109.8      |
| C(18)-C(1)-H(1A) | 109.8      |
| O(2)-C(1)-H(1B)  | 109.8      |
| C(18)-C(1)-H(1B) | 109.8      |
| H(1A)-C(1)-H(1B) | 108.3      |
| C(4)-O(2)-C(1)   | 116.60(9)  |
| O(3)-C(4)-O(2)   | 123.10(12) |
| O(3)-C(4)-C(5)   | 126.15(12) |
| O(2)-C(4)-C(5)   | 110.73(10) |
| C(4)-C(5)-C(6)   | 110.85(14) |
| C(4)-C(5)-C(6B)  | 103.8(13)  |
| C(4)-C(5)-H(5A)  | 109.5      |
| C(6)-C(5)-H(5A)  | 109.5      |
| C(4)-C(5)-H(5B)  | 109.5      |
| C(6)-C(5)-H(5B)  | 109.5      |
| H(5A)-C(5)-H(5B) | 108.1      |
| C(7)-C(6)-C(5)   | 112.26(14) |
| C(7)-C(6)-H(6A)  | 109.2      |
| C(5)-C(6)-H(6A)  | 109.2      |
| C(7)-C(6)-H(6B)  | 109.2      |

|                     |            |
|---------------------|------------|
| C(5)-C(6)-H(6B)     | 109.2      |
| H(6A)-C(6)-H(6B)    | 107.9      |
| C(8)-C(7)-C(6)      | 124.81(19) |
| C(8)-C(7)-H(7)      | 117.6      |
| C(6)-C(7)-H(7)      | 117.6      |
| C(7)-C(8)-C(9)      | 124.5(2)   |
| C(7)-C(8)-H(8)      | 117.8      |
| C(9)-C(8)-H(8)      | 117.8      |
| C(8)-C(9)-C(10)     | 113.2(2)   |
| C(8)-C(9)-H(9A)     | 108.9      |
| C(10)-C(9)-H(9A)    | 108.9      |
| C(8)-C(9)-H(9B)     | 108.9      |
| C(10)-C(9)-H(9B)    | 108.9      |
| H(9A)-C(9)-H(9B)    | 107.7      |
| C(7B)-C(6B)-C(5)    | 127.5(17)  |
| C(7B)-C(6B)-H(6BA)  | 105.4      |
| C(5)-C(6B)-H(6BA)   | 105.4      |
| C(7B)-C(6B)-H(6BB)  | 105.4      |
| C(5)-C(6B)-H(6BB)   | 105.4      |
| H(6BA)-C(6B)-H(6BB) | 106.0      |
| C(8B)-C(7B)-C(6B)   | 128(2)     |
| C(8B)-C(7B)-H(7B)   | 115.8      |
| C(6B)-C(7B)-H(7B)   | 115.8      |
| C(7B)-C(8B)-C(9B)   | 114(3)     |
| C(7B)-C(8B)-H(8B)   | 123.1      |
| C(9B)-C(8B)-H(8B)   | 123.1      |
| C(8B)-C(9B)-C(10)   | 98.1(13)   |
| C(8B)-C(9B)-H(9BA)  | 112.1      |
| C(10)-C(9B)-H(9BA)  | 112.1      |
| C(8B)-C(9B)-H(9BB)  | 112.1      |
| C(10)-C(9B)-H(9BB)  | 112.1      |
| H(9BA)-C(9B)-H(9BB) | 109.8      |
| C(11)-C(10)-C(9B)   | 106.0(19)  |
| C(11)-C(10)-C(9)    | 111.45(17) |
| C(11)-C(10)-H(10A)  | 109.3      |
| C(9)-C(10)-H(10A)   | 109.3      |
| C(11)-C(10)-H(10B)  | 109.3      |
| C(9)-C(10)-H(10B)   | 109.3      |

|                     |            |
|---------------------|------------|
| H(10A)-C(10)-H(10B) | 108.0      |
| O(12)-C(11)-O(13)   | 122.88(13) |
| O(12)-C(11)-C(10)   | 125.73(13) |
| O(13)-C(11)-C(10)   | 111.37(11) |
| C(11)-O(13)-C(14)   | 116.12(10) |
| O(13)-C(14)-C(15)   | 106.57(10) |
| O(13)-C(14)-H(14A)  | 110.4      |
| C(15)-C(14)-H(14A)  | 110.4      |
| O(13)-C(14)-H(14B)  | 110.4      |
| C(15)-C(14)-H(14B)  | 110.4      |
| H(14A)-C(14)-H(14B) | 108.6      |
| C(16)-C(15)-C(20)   | 116.48(11) |
| C(16)-C(15)-C(14)   | 121.12(11) |
| C(20)-C(15)-C(14)   | 121.77(11) |
| C(15)-C(16)-C(17)   | 121.18(12) |
| C(15)-C(16)-H(16)   | 119.4      |
| C(17)-C(16)-H(16)   | 119.4      |
| C(18)-C(17)-C(16)   | 120.87(11) |
| C(18)-C(17)-H(17)   | 119.6      |
| C(16)-C(17)-H(17)   | 119.6      |
| C(17)-C(18)-C(19)   | 119.07(11) |
| C(17)-C(18)-C(1)    | 121.26(11) |
| C(19)-C(18)-C(1)    | 119.60(11) |
| C(20)-C(19)-C(18)   | 118.86(11) |
| C(20)-C(19)-H(19)   | 120.6      |
| C(18)-C(19)-H(19)   | 120.6      |
| C(19)-C(20)-C(15)   | 123.48(10) |
| C(19)-C(20)-N(21)   | 115.89(10) |
| C(15)-C(20)-N(21)   | 120.62(10) |
| O(23)-N(21)-O(22)   | 123.98(10) |
| O(23)-N(21)-C(20)   | 117.62(10) |
| O(22)-N(21)-C(20)   | 118.39(10) |

---

Symmetry transformations used to generate equivalent atoms:



**Table S21.** Anisotropic displacement parameters (  $\text{\AA}^2 \times 10^3$  ) for **7a**. The anisotropic displacement factor exponent takes the form:  $-2\pi^2[ h^2a^{*2}U^{11} + \dots + 2 h k a^* b^* U^{12} ]$

|       | U <sup>11</sup> | U <sup>22</sup> | U <sup>33</sup> | U <sup>23</sup> | U <sup>13</sup> | U <sup>12</sup> |
|-------|-----------------|-----------------|-----------------|-----------------|-----------------|-----------------|
| C(1)  | 29(1)           | 23(1)           | 41(1)           | -4(1)           | 4(1)            | -5(1)           |
| O(2)  | 32(1)           | 24(1)           | 34(1)           | -5(1)           | 1(1)            | 1(1)            |
| O(3)  | 42(1)           | 38(1)           | 27(1)           | -1(1)           | 2(1)            | 6(1)            |
| C(4)  | 36(1)           | 18(1)           | 26(1)           | 5(1)            | 2(1)            | 2(1)            |
| C(5)  | 33(1)           | 32(1)           | 32(1)           | 1(1)            | -1(1)           | 7(1)            |
| C(6)  | 31(1)           | 34(1)           | 28(1)           | -4(1)           | 6(1)            | 0(1)            |
| C(7)  | 21(1)           | 35(1)           | 32(1)           | -1(1)           | 2(1)            | -1(1)           |
| C(8)  | 25(1)           | 33(1)           | 33(1)           | 1(1)            | -1(1)           | -4(1)           |
| C(9)  | 31(1)           | 39(1)           | 35(1)           | -7(1)           | 1(1)            | 5(1)            |
| C(6B) | 29(5)           | 44(5)           | 26(5)           | -4(5)           | 11(5)           | 0(5)            |
| C(7B) | 29(4)           | 33(4)           | 29(4)           | 2(4)            | 1(4)            | 1(4)            |
| C(8B) | 31(4)           | 40(4)           | 30(4)           | 3(4)            | -4(4)           | -1(4)           |
| C(9B) | 29(5)           | 34(5)           | 30(5)           | -3(5)           | -3(5)           | -5(5)           |
| C(10) | 37(1)           | 31(1)           | 43(1)           | -7(1)           | 12(1)           | -7(1)           |
| C(11) | 45(1)           | 22(1)           | 30(1)           | 2(1)            | 10(1)           | 2(1)            |
| O(12) | 59(1)           | 73(1)           | 28(1)           | -5(1)           | 6(1)            | 16(1)           |
| O(13) | 36(1)           | 23(1)           | 29(1)           | -1(1)           | 7(1)            | -2(1)           |
| C(14) | 36(1)           | 27(1)           | 32(1)           | 5(1)            | -1(1)           | 3(1)            |
| C(15) | 24(1)           | 25(1)           | 27(1)           | 1(1)            | -1(1)           | 2(1)            |
| C(16) | 36(1)           | 34(1)           | 24(1)           | -1(1)           | -4(1)           | 0(1)            |
| C(17) | 31(1)           | 30(1)           | 30(1)           | -8(1)           | -3(1)           | -3(1)           |
| C(18) | 20(1)           | 23(1)           | 33(1)           | -2(1)           | 3(1)            | -3(1)           |
| C(19) | 22(1)           | 24(1)           | 25(1)           | 1(1)            | 4(1)            | -2(1)           |
| C(20) | 19(1)           | 23(1)           | 24(1)           | -3(1)           | 1(1)            | -1(1)           |
| N(21) | 30(1)           | 24(1)           | 27(1)           | -2(1)           | 6(1)            | -1(1)           |
| O(22) | 41(1)           | 32(1)           | 49(1)           | -12(1)          | 4(1)            | 12(1)           |
| O(23) | 51(1)           | 39(1)           | 28(1)           | -7(1)           | -10(1)          | 5(1)            |

**Table S22.** Hydrogen coordinates (  $\times 10^4$  ) and isotropic displacement parameters (  $\text{\AA}^2 \times 10^3$  ) for **7a**.

|        | x         | y      | z | U(eq) |
|--------|-----------|--------|---|-------|
| H(1A)  | 38205434  | 724837 |   |       |
| H(1B)  | 33955199  | 594637 |   |       |
| H(5A)  | 89204804  | 647939 |   |       |
| H(5B)  | 96025403  | 746439 |   |       |
| H(6A)  | 104125811 | 555237 |   |       |
| H(6B)  | 84485995  | 527237 |   |       |
| H(7)   | 103916898 | 695535 |   |       |
| H(8)   | 77377381  | 550736 |   |       |
| H(9A)  | 100448339 | 689342 |   |       |
| H(9B)  | 80488433  | 707442 |   |       |
| H(6BA) | 104916140 | 604439 |   |       |
| H(6BB) | 88096009  | 530039 |   |       |
| H(7B)  | 77037077  | 674336 |   |       |
| H(8B)  | 102797629 | 551540 |   |       |
| H(9BA) | 93478565  | 725537 |   |       |
| H(9BB) | 74568316  | 680437 |   |       |
| H(10A) | 90479506  | 590844 |   |       |
| H(10B) | 97078859  | 500444 |   |       |
| H(14A) | 39909045  | 448738 |   |       |
| H(14B) | 33069305  | 571038 |   |       |
| H(16)  | 36297652  | 399638 |   |       |
| H(17)  | 36816278  | 444836 |   |       |
| H(19)  | 41906830  | 779628 |   |       |

**Table S23.** Crystal data and structure refinement for **7b**.

|                                   |                                                               |                            |
|-----------------------------------|---------------------------------------------------------------|----------------------------|
| Empirical formula                 | C <sub>18</sub> H <sub>21</sub> N O <sub>6</sub>              |                            |
| Formula weight                    | 347.36                                                        |                            |
| Temperature                       | 173(2) K                                                      |                            |
| Wavelength                        | 0.71073 Å                                                     |                            |
| Crystal system                    | Monoclinic                                                    |                            |
| Space group                       | <i>P</i> 2 <sub>1</sub> / <i>c</i>                            |                            |
| Unit cell dimensions              | <i>a</i> = 17.150(4) Å                                        | $\alpha = 90^\circ$        |
|                                   | <i>b</i> = 9.733(3) Å                                         | $\beta = 106.541(7)^\circ$ |
|                                   | <i>c</i> = 10.702(3) Å                                        | $\gamma = 90^\circ$        |
| Volume                            | 1712.6(8) Å <sup>3</sup>                                      |                            |
| Z                                 | 4                                                             |                            |
| Density (calculated)              | 1.347 Mg/m <sup>3</sup>                                       |                            |
| Absorption coefficient            | 0.102 mm <sup>-1</sup>                                        |                            |
| F(000)                            | 736                                                           |                            |
| Crystal size                      | 0.132 x 0.089 x 0.028 mm <sup>3</sup>                         |                            |
| Theta range for data collection   | 2.478 to 25.499°.                                             |                            |
| Index ranges                      | -20 ≤ <i>h</i> ≤ 20, -11 ≤ <i>k</i> ≤ 11, -12 ≤ <i>l</i> ≤ 12 |                            |
| Reflections collected             | 20258                                                         |                            |
| Independent reflections           | 3188 [R(int) = 0.1536]                                        |                            |
| Completeness to theta = 25.242°   | 99.7 %                                                        |                            |
| Absorption correction             | Semi-empirical from equivalents                               |                            |
| Max. and min. transmission        | 0.7455 and 0.3322                                             |                            |
| Refinement method                 | Full-matrix least-squares on F <sup>2</sup>                   |                            |
| Data / restraints / parameters    | 3188 / 0 / 226                                                |                            |
| Goodness-of-fit on F <sup>2</sup> | 1.182                                                         |                            |
| Final R indices [I > 2σ(I)]       | R1 = 0.1112, wR2 = 0.2192                                     |                            |
| R indices (all data)              | R1 = 0.1464, wR2 = 0.2349                                     |                            |
| Largest diff. peak and hole       | 0.400 and -0.316 e·Å <sup>-3</sup>                            |                            |

**Table S24.** Atomic coordinates (  $\times 10^4$  ) and equivalent isotropic displacement parameters (  $\text{\AA}^2 \times 10^3$  ) for **7b**.  $U(\text{eq})$  is defined as one third of the trace of the orthogonalized  $U^{ij}$  tensor.

|       | x       | y       | z       | U(eq) |
|-------|---------|---------|---------|-------|
| C(1)  | 3831(3) | 3716(5) | 4416(4) | 29(1) |
| C(2)  | 3494(3) | 4503(5) | 3303(5) | 33(1) |
| C(3)  | 3441(3) | 5924(5) | 3327(5) | 36(1) |
| C(4)  | 3731(3) | 6647(5) | 4486(5) | 32(1) |
| C(5)  | 4104(3) | 5913(5) | 5601(5) | 31(1) |
| C(6)  | 4157(2) | 4501(5) | 5556(4) | 29(1) |
| C(7)  | 3817(3) | 2171(5) | 4328(5) | 35(1) |
| O(8)  | 3318(2) | 1734(3) | 3070(3) | 37(1) |
| O(9)  | 2230(2) | 1767(4) | 3837(3) | 43(1) |
| C(10) | 2512(3) | 1599(5) | 2956(5) | 33(1) |
| C(11) | 2051(3) | 1161(5) | 1583(5) | 37(1) |
| C(12) | 1140(3) | 1462(6) | 1203(5) | 43(1) |
| C(13) | 908(3)  | 2921(6) | 732(5)  | 45(1) |
| C(14) | 1193(3) | 4030(6) | 1756(6) | 50(2) |
| C(15) | 773(3)  | 4983(6) | 2098(6) | 50(1) |
| C(16) | 1104(4) | 6000(5) | 3157(5) | 47(1) |
| C(17) | 1083(3) | 7470(5) | 2689(5) | 39(1) |
| C(18) | 1395(3) | 8495(5) | 3810(5) | 38(1) |
| C(19) | 2255(3) | 8190(5) | 4570(5) | 35(1) |
| O(20) | 2472(2) | 7661(4) | 5625(3) | 47(1) |
| O(21) | 2785(2) | 8556(3) | 3897(3) | 38(1) |
| C(22) | 3633(3) | 8173(5) | 4499(5) | 37(1) |
| N(23) | 4605(2) | 3813(4) | 6787(4) | 35(1) |
| O(24) | 4851(2) | 4539(4) | 7770(3) | 44(1) |
| O(25) | 4723(2) | 2588(4) | 6770(3) | 48(1) |

**Table S25.** Bond lengths [Å] and angles [°] for **7b**

---

|              |          |
|--------------|----------|
| C(1)-C(2)    | 1.395(6) |
| C(1)-C(6)    | 1.413(7) |
| C(1)-C(7)    | 1.506(7) |
| C(2)-C(3)    | 1.387(7) |
| C(2)-H(2)    | 0.9500   |
| C(3)-C(4)    | 1.389(7) |
| C(3)-H(3)    | 0.9500   |
| C(4)-C(5)    | 1.382(6) |
| C(4)-C(22)   | 1.495(7) |
| C(5)-C(6)    | 1.379(7) |
| C(5)-H(5)    | 0.9500   |
| C(6)-N(23)   | 1.482(6) |
| C(7)-O(8)    | 1.440(6) |
| C(7)-H(7A)   | 0.9900   |
| C(7)-H(7B)   | 0.9900   |
| O(8)-C(10)   | 1.359(5) |
| O(9)-C(10)   | 1.188(6) |
| C(10)-C(11)  | 1.517(7) |
| C(11)-C(12)  | 1.526(7) |
| C(11)-H(11A) | 0.9900   |
| C(11)-H(11B) | 0.9900   |
| C(12)-C(13)  | 1.521(8) |
| C(12)-H(12A) | 0.9900   |
| C(12)-H(12B) | 0.9900   |
| C(13)-C(14)  | 1.517(8) |
| C(13)-H(13A) | 0.9900   |
| C(13)-H(13B) | 0.9900   |
| C(14)-C(15)  | 1.289(8) |
| C(14)-H(14)  | 0.9500   |
| C(15)-C(16)  | 1.489(8) |
| C(15)-H(15)  | 0.9500   |
| C(16)-C(17)  | 1.513(7) |
| C(16)-H(16A) | 0.9900   |
| C(16)-H(16B) | 0.9900   |
| C(17)-C(18)  | 1.535(7) |
| C(17)-H(17A) | 0.9900   |

|              |          |
|--------------|----------|
| C(17)-H(17B) | 0.9900   |
| C(18)-C(19)  | 1.497(7) |
| C(18)-H(18A) | 0.9900   |
| C(18)-H(18B) | 0.9900   |
| C(19)-O(20)  | 1.200(6) |
| C(19)-O(21)  | 1.359(6) |
| O(21)-C(22)  | 1.461(5) |
| C(22)-H(22A) | 0.9900   |
| C(22)-H(22B) | 0.9900   |
| N(23)-O(25)  | 1.211(5) |
| N(23)-O(24)  | 1.237(5) |

|                  |          |
|------------------|----------|
| C(2)-C(1)-C(6)   | 114.0(4) |
| C(2)-C(1)-C(7)   | 120.0(4) |
| C(6)-C(1)-C(7)   | 126.1(4) |
| C(3)-C(2)-C(1)   | 123.0(5) |
| C(3)-C(2)-H(2)   | 118.5    |
| C(1)-C(2)-H(2)   | 118.5    |
| C(2)-C(3)-C(4)   | 120.9(5) |
| C(2)-C(3)-H(3)   | 119.6    |
| C(4)-C(3)-H(3)   | 119.6    |
| C(5)-C(4)-C(3)   | 118.0(4) |
| C(5)-C(4)-C(22)  | 122.1(4) |
| C(3)-C(4)-C(22)  | 119.9(4) |
| C(6)-C(5)-C(4)   | 120.3(4) |
| C(6)-C(5)-H(5)   | 119.9    |
| C(4)-C(5)-H(5)   | 119.9    |
| C(5)-C(6)-C(1)   | 123.7(4) |
| C(5)-C(6)-N(23)  | 116.2(4) |
| C(1)-C(6)-N(23)  | 120.1(4) |
| O(8)-C(7)-C(1)   | 110.3(4) |
| O(8)-C(7)-H(7A)  | 109.6    |
| C(1)-C(7)-H(7A)  | 109.6    |
| O(8)-C(7)-H(7B)  | 109.6    |
| C(1)-C(7)-H(7B)  | 109.6    |
| H(7A)-C(7)-H(7B) | 108.1    |
| C(10)-O(8)-C(7)  | 115.6(4) |
| O(9)-C(10)-O(8)  | 123.3(4) |

|                     |          |
|---------------------|----------|
| O(9)-C(10)-C(11)    | 126.1(4) |
| O(8)-C(10)-C(11)    | 110.5(4) |
| C(10)-C(11)-C(12)   | 114.6(4) |
| C(10)-C(11)-H(11A)  | 108.6    |
| C(12)-C(11)-H(11A)  | 108.6    |
| C(10)-C(11)-H(11B)  | 108.6    |
| C(12)-C(11)-H(11B)  | 108.6    |
| H(11A)-C(11)-H(11B) | 107.6    |
| C(13)-C(12)-C(11)   | 114.8(4) |
| C(13)-C(12)-H(12A)  | 108.6    |
| C(11)-C(12)-H(12A)  | 108.6    |
| C(13)-C(12)-H(12B)  | 108.6    |
| C(11)-C(12)-H(12B)  | 108.6    |
| H(12A)-C(12)-H(12B) | 107.6    |
| C(14)-C(13)-C(12)   | 115.1(4) |
| C(14)-C(13)-H(13A)  | 108.5    |
| C(12)-C(13)-H(13A)  | 108.5    |
| C(14)-C(13)-H(13B)  | 108.5    |
| C(12)-C(13)-H(13B)  | 108.5    |
| H(13A)-C(13)-H(13B) | 107.5    |
| C(15)-C(14)-C(13)   | 128.8(5) |
| C(15)-C(14)-H(14)   | 115.6    |
| C(13)-C(14)-H(14)   | 115.6    |
| C(14)-C(15)-C(16)   | 124.8(5) |
| C(14)-C(15)-H(15)   | 117.6    |
| C(16)-C(15)-H(15)   | 117.6    |
| C(15)-C(16)-C(17)   | 114.1(4) |
| C(15)-C(16)-H(16A)  | 108.7    |
| C(17)-C(16)-H(16A)  | 108.7    |
| C(15)-C(16)-H(16B)  | 108.7    |
| C(17)-C(16)-H(16B)  | 108.7    |
| H(16A)-C(16)-H(16B) | 107.6    |
| C(16)-C(17)-C(18)   | 112.7(4) |
| C(16)-C(17)-H(17A)  | 109.1    |
| C(18)-C(17)-H(17A)  | 109.1    |
| C(16)-C(17)-H(17B)  | 109.1    |
| C(18)-C(17)-H(17B)  | 109.1    |
| H(17A)-C(17)-H(17B) | 107.8    |

|                     |          |
|---------------------|----------|
| C(19)-C(18)-C(17)   | 111.5(4) |
| C(19)-C(18)-H(18A)  | 109.3    |
| C(17)-C(18)-H(18A)  | 109.3    |
| C(19)-C(18)-H(18B)  | 109.3    |
| C(17)-C(18)-H(18B)  | 109.3    |
| H(18A)-C(18)-H(18B) | 108.0    |
| O(20)-C(19)-O(21)   | 122.5(4) |
| O(20)-C(19)-C(18)   | 126.1(5) |
| O(21)-C(19)-C(18)   | 111.4(4) |
| C(19)-O(21)-C(22)   | 115.6(4) |
| O(21)-C(22)-C(4)    | 110.5(4) |
| O(21)-C(22)-H(22A)  | 109.6    |
| C(4)-C(22)-H(22A)   | 109.6    |
| O(21)-C(22)-H(22B)  | 109.6    |
| C(4)-C(22)-H(22B)   | 109.6    |
| H(22A)-C(22)-H(22B) | 108.1    |
| O(25)-N(23)-O(24)   | 123.9(4) |
| O(25)-N(23)-C(6)    | 118.5(4) |
| O(24)-N(23)-C(6)    | 117.6(4) |

---

Symmetry transformations used to generate equivalent atoms:



**Table S26.** Anisotropic displacement parameters (  $\text{\AA}^2 \times 10^3$  ) for **7b**. The anisotropic displacement factor exponent takes the form:  $-2\pi^2[ h^2a^2U^{11} + \dots + 2 h k a^* b^* U^{12} ]$

|       | U <sup>11</sup> | U <sup>22</sup> | U <sup>33</sup> | U <sup>23</sup> | U <sup>13</sup> | U <sup>12</sup> |
|-------|-----------------|-----------------|-----------------|-----------------|-----------------|-----------------|
| C(1)  | 18(2)           | 34(3)           | 36(3)           | 4(2)            | 9(2)            | 7(2)            |
| C(2)  | 27(2)           | 36(3)           | 34(3)           | 0(2)            | 6(2)            | 6(2)            |
| C(3)  | 31(3)           | 40(3)           | 36(3)           | 8(2)            | 6(2)            | 3(2)            |
| C(4)  | 22(2)           | 33(3)           | 39(3)           | 3(2)            | 5(2)            | 0(2)            |
| C(5)  | 19(2)           | 39(3)           | 34(3)           | -5(2)           | 5(2)            | -5(2)           |
| C(6)  | 18(2)           | 39(3)           | 29(2)           | 6(2)            | 4(2)            | 2(2)            |
| C(7)  | 29(2)           | 33(3)           | 43(3)           | 1(2)            | 8(2)            | 0(2)            |
| O(8)  | 28(2)           | 41(2)           | 42(2)           | -9(2)           | 12(2)           | -2(2)           |
| O(9)  | 38(2)           | 52(2)           | 44(2)           | -6(2)           | 18(2)           | -2(2)           |
| C(10) | 28(2)           | 24(3)           | 47(3)           | 0(2)            | 13(2)           | 2(2)            |
| C(11) | 36(3)           | 33(3)           | 44(3)           | -11(2)          | 13(2)           | -1(2)           |
| C(12) | 30(3)           | 52(3)           | 43(3)           | -8(3)           | 3(2)            | -4(2)           |
| C(13) | 33(3)           | 55(4)           | 44(3)           | -4(3)           | 5(2)            | 1(2)            |
| C(14) | 35(3)           | 57(4)           | 52(3)           | 3(3)            | 3(3)            | 12(3)           |
| C(15) | 44(3)           | 36(3)           | 61(4)           | 4(3)            | 3(3)            | -5(3)           |
| C(16) | 52(3)           | 38(3)           | 47(3)           | -1(3)           | 5(3)            | -10(3)          |
| C(17) | 31(3)           | 44(3)           | 37(3)           | 0(2)            | 1(2)            | -2(2)           |
| C(18) | 28(2)           | 37(3)           | 45(3)           | -4(2)           | 5(2)            | -1(2)           |
| C(19) | 35(3)           | 31(3)           | 36(3)           | -8(2)           | 8(2)            | -1(2)           |
| O(20) | 42(2)           | 63(3)           | 33(2)           | -2(2)           | 6(2)            | 1(2)            |
| O(21) | 29(2)           | 38(2)           | 43(2)           | 7(2)            | 6(2)            | 3(2)            |
| C(22) | 26(2)           | 28(3)           | 52(3)           | 3(2)            | 6(2)            | -1(2)           |
| N(23) | 30(2)           | 36(3)           | 39(2)           | 5(2)            | 6(2)            | -1(2)           |
| O(24) | 43(2)           | 52(2)           | 33(2)           | 4(2)            | 2(2)            | -11(2)          |
| O(25) | 53(2)           | 32(2)           | 52(2)           | 10(2)           | 6(2)            | 11(2)           |

**Table S27.** Hydrogen coordinates (  $\times 10^4$  ) and isotropic displacement parameters (  $\text{\AA}^2 \times 10^3$  ) for **7b**.

|        | x        | y      | z  | U(eq) |
|--------|----------|--------|----|-------|
| H(2)   | 32924044 | 249139 |    |       |
| H(3)   | 32036410 | 254144 |    |       |
| H(5)   | 43246382 | 640338 |    |       |
| H(7A)  | 43781823 | 447042 |    |       |
| H(7B)  | 36011785 | 501842 |    |       |
| H(11A) | 2129161  | 149745 |    |       |
| H(11B) | 22901635 | 96145  |    |       |
| H(12A) | 860815   | 50652  |    |       |
| H(12B) | 9381282  | 196752 |    |       |
| H(13A) | 11373117 | -1     | 54 |       |
| H(13B) | 3092974  | 38954  |    |       |
| H(14)  | 17574021 | 220860 |    |       |
| H(15)  | 2115042  | 163960 |    |       |
| H(16A) | 16735751 | 361357 |    |       |
| H(16B) | 7875937  | 379757 |    |       |
| H(17A) | 5177713  | 220446 |    |       |
| H(17B) | 14207547 | 207946 |    |       |
| H(18A) | 13649437 | 345245 |    |       |
| H(18B) | 10438453 | 440045 |    |       |
| H(22A) | 38098510 | 540944 |    |       |
| H(22B) | 39828608 | 401744 |    |       |

**Table S28.** Crystal data and structure refinement for **10a**.

|                                              |                                                               |                              |
|----------------------------------------------|---------------------------------------------------------------|------------------------------|
| Empirical formula                            | C <sub>16</sub> H <sub>17</sub> N O <sub>6</sub>              |                              |
| Formula weight                               | 319.30                                                        |                              |
| Temperature                                  | 173(2) K                                                      |                              |
| Wavelength                                   | 0.71073 Å                                                     |                              |
| Crystal system                               | Monoclinic                                                    |                              |
| Space group                                  | <i>P</i> 2 <sub>1</sub> / <i>c</i>                            |                              |
| Unit cell dimensions                         | <i>a</i> = 8.1387(4) Å                                        | $\alpha = 90^\circ$          |
|                                              | <i>b</i> = 24.2934(10) Å                                      | $\beta = 117.4138(13)^\circ$ |
|                                              | <i>c</i> = 8.5069(4) Å                                        | $\gamma = 90^\circ$          |
| Volume                                       | 1493.08(12) Å <sup>3</sup>                                    |                              |
| Z                                            | 4                                                             |                              |
| Density (calculated)                         | 1.420 Mg/m <sup>3</sup>                                       |                              |
| Absorption coefficient                       | 0.110 mm <sup>-1</sup>                                        |                              |
| F(000)                                       | 672                                                           |                              |
| Crystal size                                 | 0.211 x 0.138 x 0.125 mm <sup>3</sup>                         |                              |
| Theta range for data collection              | 2.825 to 28.293°.                                             |                              |
| Index ranges                                 | -10 ≤ <i>h</i> ≤ 10, -32 ≤ <i>k</i> ≤ 32, -11 ≤ <i>l</i> ≤ 11 |                              |
| Reflections collected                        | 34884                                                         |                              |
| Independent reflections                      | 3658 [R(int) = 0.0607]                                        |                              |
| Completeness to theta = 25.242°              | 98.0 %                                                        |                              |
| Absorption correction                        | Semi-empirical from equivalents                               |                              |
| Max. and min. transmission                   | 0.7457 and 0.6131                                             |                              |
| Refinement method                            | Full-matrix least-squares on F <sup>2</sup>                   |                              |
| Data / restraints / parameters               | 3658 / 0 / 208                                                |                              |
| Goodness-of-fit on F <sup>2</sup>            | 1.025                                                         |                              |
| Final R indices [ <i>I</i> > 2σ( <i>I</i> )] | R1 = 0.0443, wR2 = 0.1139                                     |                              |
| R indices (all data)                         | R1 = 0.0494, wR2 = 0.1190                                     |                              |
| Largest diff. peak and hole                  | 0.484 and -0.244 e·Å <sup>-3</sup>                            |                              |

**Table S29.** Atomic coordinates (  $\times 10^4$  ) and equivalent isotropic displacement parameters (  $\text{\AA}^2 \times 10^3$  ) for **10a**.  $U(\text{eq})$  is defined as one third of the trace of the orthogonalized  $U_{ij}$  tensor.

|       | x        | y       | z       | U(eq) |
|-------|----------|---------|---------|-------|
| C(1)  | 3548(2)  | 3963(1) | 4928(2) | 27(1) |
| C(2)  | 4779(2)  | 4219(1) | 6513(2) | 26(1) |
| C(3)  | 4354(2)  | 4764(1) | 6755(2) | 30(1) |
| C(4)  | 2805(2)  | 5041(1) | 5534(2) | 37(1) |
| C(5)  | 1611(2)  | 4777(1) | 3998(2) | 40(1) |
| C(6)  | 1985(2)  | 4242(1) | 3700(2) | 34(1) |
| C(7)  | 3877(2)  | 3395(1) | 4421(2) | 32(1) |
| O(8)  | 5011(1)  | 3477(1) | 3526(1) | 30(1) |
| O(9)  | 4910(2)  | 2569(1) | 3040(1) | 36(1) |
| C(10) | 5406(2)  | 3022(1) | 2871(2) | 25(1) |
| C(11) | 6550(2)  | 3148(1) | 1947(2) | 28(1) |
| C(12) | 8529(2)  | 2939(1) | 3019(2) | 34(1) |
| C(13) | 9531(2)  | 3232(1) | 4786(2) | 33(1) |
| C(14) | 10778(2) | 3004(1) | 6244(2) | 33(1) |
| C(15) | 11893(2) | 3285(1) | 7978(2) | 34(1) |
| C(16) | 11125(2) | 3828(1) | 8265(2) | 33(1) |
| C(17) | 9526(2)  | 3734(1) | 8659(2) | 28(1) |
| O(18) | 9622(2)  | 3466(1) | 9889(1) | 43(1) |
| O(19) | 7957(1)  | 3980(1) | 7502(1) | 30(1) |
| C(20) | 6404(2)  | 3909(1) | 7888(2) | 31(1) |
| N(21) | 5579(2)  | 5083(1) | 8342(2) | 38(1) |
| O(22) | 4863(2)  | 5452(1) | 8811(2) | 50(1) |
| O(23) | 7232(2)  | 4976(1) | 9100(2) | 51(1) |

**Table S30.** Bond lengths [Å] and angles [°] for **10a**.

---

|              |            |
|--------------|------------|
| C(1)-C(6)    | 1.3946(19) |
| C(1)-C(2)    | 1.4018(18) |
| C(1)-C(7)    | 1.5060(17) |
| C(2)-C(3)    | 1.4057(17) |
| C(2)-C(20)   | 1.5040(18) |
| C(3)-C(4)    | 1.384(2)   |
| C(3)-N(21)   | 1.4765(18) |
| C(4)-C(5)    | 1.376(2)   |
| C(4)-H(4)    | 0.9500     |
| C(5)-C(6)    | 1.384(2)   |
| C(5)-H(5)    | 0.9500     |
| C(6)-H(6)    | 0.9500     |
| C(7)-O(8)    | 1.4554(14) |
| C(7)-H(7A)   | 0.9900     |
| C(7)-H(7B)   | 0.9900     |
| O(8)-C(10)   | 1.3418(14) |
| O(9)-C(10)   | 1.2024(15) |
| C(10)-C(11)  | 1.5003(17) |
| C(11)-C(12)  | 1.5259(18) |
| C(11)-H(11A) | 0.9900     |
| C(11)-H(11B) | 0.9900     |
| C(12)-C(13)  | 1.5169(19) |
| C(12)-H(12A) | 0.9900     |
| C(12)-H(12B) | 0.9900     |
| C(13)-C(14)  | 1.3094(19) |
| C(13)-H(13)  | 0.9500     |
| C(14)-C(15)  | 1.4944(19) |
| C(14)-H(14)  | 0.9500     |
| C(15)-C(16)  | 1.5262(19) |
| C(15)-H(15A) | 0.9900     |
| C(15)-H(15B) | 0.9900     |
| C(16)-C(17)  | 1.5035(18) |
| C(16)-H(16A) | 0.9900     |
| C(16)-H(16B) | 0.9900     |
| C(17)-O(18)  | 1.2038(16) |
| C(17)-O(19)  | 1.3418(15) |

|                    |            |
|--------------------|------------|
| O(19)-C(20)        | 1.4552(14) |
| C(20)-H(20A)       | 0.9900     |
| C(20)-H(20B)       | 0.9900     |
| N(21)-O(23)        | 1.2219(18) |
| N(21)-O(22)        | 1.2314(16) |
| C(6)-C(1)-C(2)     | 120.43(11) |
| C(6)-C(1)-C(7)     | 116.83(12) |
| C(2)-C(1)-C(7)     | 122.66(12) |
| C(1)-C(2)-C(3)     | 116.31(11) |
| C(1)-C(2)-C(20)    | 120.55(11) |
| C(3)-C(2)-C(20)    | 123.08(12) |
| C(4)-C(3)-C(2)     | 123.25(12) |
| C(4)-C(3)-N(21)    | 115.44(12) |
| C(2)-C(3)-N(21)    | 121.30(12) |
| C(5)-C(4)-C(3)     | 119.13(12) |
| C(5)-C(4)-H(4)     | 120.4      |
| C(3)-C(4)-H(4)     | 120.4      |
| C(4)-C(5)-C(6)     | 119.55(13) |
| C(4)-C(5)-H(5)     | 120.2      |
| C(6)-C(5)-H(5)     | 120.2      |
| C(5)-C(6)-C(1)     | 121.32(13) |
| C(5)-C(6)-H(6)     | 119.3      |
| C(1)-C(6)-H(6)     | 119.3      |
| O(8)-C(7)-C(1)     | 105.34(9)  |
| O(8)-C(7)-H(7A)    | 110.7      |
| C(1)-C(7)-H(7A)    | 110.7      |
| O(8)-C(7)-H(7B)    | 110.7      |
| C(1)-C(7)-H(7B)    | 110.7      |
| H(7A)-C(7)-H(7B)   | 108.8      |
| C(10)-O(8)-C(7)    | 115.83(9)  |
| O(9)-C(10)-O(8)    | 123.09(11) |
| O(9)-C(10)-C(11)   | 124.90(11) |
| O(8)-C(10)-C(11)   | 112.01(10) |
| C(10)-C(11)-C(12)  | 110.99(10) |
| C(10)-C(11)-H(11A) | 109.4      |
| C(12)-C(11)-H(11A) | 109.4      |
| C(10)-C(11)-H(11B) | 109.4      |

|                     |            |
|---------------------|------------|
| C(12)-C(11)-H(11B)  | 109.4      |
| H(11A)-C(11)-H(11B) | 108.0      |
| C(13)-C(12)-C(11)   | 112.02(11) |
| C(13)-C(12)-H(12A)  | 109.2      |
| C(11)-C(12)-H(12A)  | 109.2      |
| C(13)-C(12)-H(12B)  | 109.2      |
| C(11)-C(12)-H(12B)  | 109.2      |
| H(12A)-C(12)-H(12B) | 107.9      |
| C(14)-C(13)-C(12)   | 124.72(12) |
| C(14)-C(13)-H(13)   | 117.6      |
| C(12)-C(13)-H(13)   | 117.6      |
| C(13)-C(14)-C(15)   | 126.58(12) |
| C(13)-C(14)-H(14)   | 116.7      |
| C(15)-C(14)-H(14)   | 116.7      |
| C(14)-C(15)-C(16)   | 116.44(11) |
| C(14)-C(15)-H(15A)  | 108.2      |
| C(16)-C(15)-H(15A)  | 108.2      |
| C(14)-C(15)-H(15B)  | 108.2      |
| C(16)-C(15)-H(15B)  | 108.2      |
| H(15A)-C(15)-H(15B) | 107.3      |
| C(17)-C(16)-C(15)   | 111.33(11) |
| C(17)-C(16)-H(16A)  | 109.4      |
| C(15)-C(16)-H(16A)  | 109.4      |
| C(17)-C(16)-H(16B)  | 109.4      |
| C(15)-C(16)-H(16B)  | 109.4      |
| H(16A)-C(16)-H(16B) | 108.0      |
| O(18)-C(17)-O(19)   | 122.51(12) |
| O(18)-C(17)-C(16)   | 124.06(12) |
| O(19)-C(17)-C(16)   | 113.43(11) |
| C(17)-O(19)-C(20)   | 114.44(10) |
| O(19)-C(20)-C(2)    | 107.98(9)  |
| O(19)-C(20)-H(20A)  | 110.1      |
| C(2)-C(20)-H(20A)   | 110.1      |
| O(19)-C(20)-H(20B)  | 110.1      |
| C(2)-C(20)-H(20B)   | 110.1      |
| H(20A)-C(20)-H(20B) | 108.4      |
| O(23)-N(21)-O(22)   | 123.63(13) |
| O(23)-N(21)-C(3)    | 119.15(11) |

O(22)-N(21)-C(3)

117.21(13)

---

Symmetry transformations used to generate equivalent atoms:



**Table S31.** Anisotropic displacement parameters (  $\text{\AA}^2 \times 10^3$  ) for **10a**. The anisotropic displacement factor exponent takes the form:  $-2\pi^2[ h^2a^2U^{11} + \dots + 2 h k a^* b^* U^{12} ]$

|       | U <sup>11</sup> | U <sup>22</sup> | U <sup>33</sup> | U <sup>23</sup> | U <sup>13</sup> | U <sup>12</sup> |
|-------|-----------------|-----------------|-----------------|-----------------|-----------------|-----------------|
| C(1)  | 32(1)           | 24(1)           | 34(1)           | 0(1)            | 23(1)           | -2(1)           |
| C(2)  | 31(1)           | 24(1)           | 33(1)           | 2(1)            | 23(1)           | -1(1)           |
| C(3)  | 41(1)           | 25(1)           | 35(1)           | -1(1)           | 27(1)           | -2(1)           |
| C(4)  | 49(1)           | 26(1)           | 49(1)           | 5(1)            | 34(1)           | 8(1)            |
| C(5)  | 40(1)           | 39(1)           | 46(1)           | 11(1)           | 24(1)           | 11(1)           |
| C(6)  | 34(1)           | 37(1)           | 35(1)           | 2(1)            | 19(1)           | -1(1)           |
| C(7)  | 41(1)           | 25(1)           | 42(1)           | -3(1)           | 30(1)           | -4(1)           |
| O(8)  | 40(1)           | 23(1)           | 38(1)           | -3(1)           | 27(1)           | -3(1)           |
| O(9)  | 47(1)           | 24(1)           | 46(1)           | -4(1)           | 28(1)           | -5(1)           |
| C(10) | 26(1)           | 24(1)           | 22(1)           | -1(1)           | 9(1)            | 1(1)            |
| C(11) | 37(1)           | 28(1)           | 24(1)           | 1(1)            | 18(1)           | 2(1)            |
| C(12) | 34(1)           | 38(1)           | 36(1)           | 0(1)            | 22(1)           | 3(1)            |
| C(13) | 32(1)           | 27(1)           | 43(1)           | 0(1)            | 20(1)           | 0(1)            |
| C(14) | 35(1)           | 31(1)           | 40(1)           | 1(1)            | 22(1)           | 2(1)            |
| C(15) | 29(1)           | 38(1)           | 37(1)           | 2(1)            | 15(1)           | 3(1)            |
| C(16) | 27(1)           | 31(1)           | 37(1)           | -4(1)           | 13(1)           | -4(1)           |
| C(17) | 31(1)           | 25(1)           | 26(1)           | -5(1)           | 12(1)           | -2(1)           |
| O(18) | 45(1)           | 50(1)           | 35(1)           | 13(1)           | 19(1)           | 8(1)            |
| O(19) | 28(1)           | 33(1)           | 32(1)           | 6(1)            | 17(1)           | 2(1)            |
| C(20) | 33(1)           | 33(1)           | 35(1)           | 6(1)            | 22(1)           | 1(1)            |
| N(21) | 57(1)           | 29(1)           | 41(1)           | -5(1)           | 34(1)           | -9(1)           |
| O(22) | 82(1)           | 29(1)           | 51(1)           | -7(1)           | 42(1)           | 2(1)            |
| O(23) | 46(1)           | 58(1)           | 54(1)           | -19(1)          | 28(1)           | -15(1)          |

**Table S32.** Hydrogen coordinates (  $\times 10^4$  ) and isotropic displacement parameters (  $\text{\AA}^2 \times 10^3$  ) for **10a**.

|        | x         | y      | z | U(eq) |
|--------|-----------|--------|---|-------|
| H(4)   | 25695408  | 575344 |   |       |
| H(5)   | 5384960   | 314948 |   |       |
| H(6)   | 11594061  | 263641 |   |       |
| H(7A)  | 45313162  | 548539 |   |       |
| H(7B)  | 26903216  | 362039 |   |       |
| H(11A) | 65673550  | 177534 |   |       |
| H(11B) | 59842971  | 76534  |   |       |
| H(12A) | 85032539  | 322740 |   |       |
| H(12B) | 92172996  | 232840 |   |       |
| H(13)  | 92333607  | 483840 |   |       |
| H(14)  | 109962622 | 619440 |   |       |
| H(15A) | 131463355 | 810441 |   |       |
| H(15B) | 120303029 | 893541 |   |       |
| H(16A) | 121174029 | 926339 |   |       |
| H(16B) | 107124059 | 719039 |   |       |
| H(20A) | 67254052  | 908337 |   |       |
| H(20B) | 60953513  | 785337 |   |       |

**Table S33.** Crystal data and structure refinement for **10b**.

|                                   |                                                  |                |
|-----------------------------------|--------------------------------------------------|----------------|
| Empirical formula                 | C <sub>18</sub> H <sub>21</sub> N O <sub>6</sub> |                |
| Formula weight                    | 347.36                                           |                |
| Temperature                       | 173(2) K                                         |                |
| Wavelength                        | 0.71073 Å                                        |                |
| Crystal system                    | Monoclinic                                       |                |
| Space group                       | Cc                                               |                |
| Unit cell dimensions              | a = 5.0300(3) Å                                  | α = 90°        |
|                                   | b = 20.5537(12) Å                                | β = 97.379(2)° |
|                                   | c = 16.8829(10) Å                                | γ = 90°        |
| Volume                            | 1730.98(18) Å <sup>3</sup>                       |                |
| Z                                 | 4                                                |                |
| Density (calculated)              | 1.333 Mg/m <sup>3</sup>                          |                |
| Absorption coefficient            | 0.100 mm <sup>-1</sup>                           |                |
| F(000)                            | 736                                              |                |
| Crystal size                      | 0.268 x 0.065 x 0.054 mm <sup>3</sup>            |                |
| Theta range for data collection   | 3.139 to 26.992°.                                |                |
| Index ranges                      | -6 ≤ h ≤ 6, -26 ≤ k ≤ 26, -21 ≤ l ≤ 21           |                |
| Reflections collected             | 10870                                            |                |
| Independent reflections           | 3487 [R(int) = 0.0750]                           |                |
| Completeness to theta = 25.242°   | 98.0 %                                           |                |
| Absorption correction             | Semi-empirical from equivalents                  |                |
| Max. and min. transmission        | 0.7456 and 0.2627                                |                |
| Refinement method                 | Full-matrix least-squares on F <sup>2</sup>      |                |
| Data / restraints / parameters    | 3487 / 2 / 226                                   |                |
| Goodness-of-fit on F <sup>2</sup> | 1.076                                            |                |
| Final R indices [I > 2σ(I)]       | R1 = 0.0782, wR2 = 0.2076                        |                |
| R indices (all data)              | R1 = 0.0829, wR2 = 0.2152                        |                |
| Absolute structure parameter      | 0.1(8)                                           |                |
| Largest diff. peak and hole       | 0.569 and -0.348 e·Å <sup>-3</sup>               |                |

**Table S34.** Atomic coordinates (  $\times 10^4$  ) and equivalent isotropic displacement parameters (  $\text{\AA}^2 \times 10^3$  ) for **10b**.  $U(\text{eq})$  is defined as one third of the trace of the orthogonalized  $U^{ij}$  tensor.

|       | x        | y       | z       | U(eq) |
|-------|----------|---------|---------|-------|
| C(1)  | 4030(9)  | 7123(2) | 4041(3) | 28(1) |
| C(2)  | 5757(9)  | 7563(2) | 3735(3) | 29(1) |
| C(3)  | 6313(12) | 7547(2) | 2953(3) | 37(1) |
| C(4)  | 5109(13) | 7081(2) | 2448(3) | 40(1) |
| C(5)  | 3350(12) | 6639(2) | 2729(3) | 39(1) |
| C(6)  | 2812(9)  | 6656(2) | 3521(3) | 30(1) |
| C(7)  | 832(10)  | 6163(2) | 3771(3) | 34(1) |
| O(8)  | 1930(6)  | 5762(2) | 4437(2) | 31(1) |
| O(9)  | 4611(8)  | 5281(2) | 3650(2) | 41(1) |
| C(10) | 3843(8)  | 5323(2) | 4279(3) | 28(1) |
| C(11) | 4686(9)  | 4917(2) | 5012(3) | 27(1) |
| C(12) | 7195(9)  | 4520(2) | 4957(3) | 29(1) |
| C(13) | 8150(11) | 4183(2) | 5770(3) | 35(1) |
| C(14) | 9180(10) | 4662(2) | 6397(3) | 33(1) |
| C(15) | 7933(11) | 4854(2) | 6999(3) | 34(1) |
| C(16) | 8834(10) | 5406(2) | 7557(3) | 33(1) |
| C(17) | 7142(10) | 6012(2) | 7327(3) | 32(1) |
| C(18) | 7784(10) | 6308(2) | 6536(3) | 29(1) |
| C(19) | 5614(9)  | 6738(2) | 6136(3) | 28(1) |
| O(20) | 3999(9)  | 7033(2) | 6464(2) | 49(1) |
| O(21) | 5610(7)  | 6751(2) | 5348(2) | 33(1) |
| C(22) | 3515(10) | 7143(2) | 4906(3) | 34(1) |
| N(23) | 7072(10) | 8085(2) | 4235(3) | 41(1) |
| O(24) | 7093(16) | 8629(2) | 3948(3) | 83(2) |
| O(25) | 8012(11) | 7971(2) | 4928(3) | 59(1) |

**Table S35.** Bond lengths [Å] and angles [°] for **10b**.

---

|              |          |
|--------------|----------|
| C(1)-C(6)    | 1.388(7) |
| C(1)-C(2)    | 1.398(7) |
| C(1)-C(22)   | 1.517(7) |
| C(2)-C(3)    | 1.384(7) |
| C(2)-N(23)   | 1.471(6) |
| C(3)-C(4)    | 1.371(8) |
| C(3)-H(3)    | 0.9500   |
| C(4)-C(5)    | 1.395(8) |
| C(4)-H(4)    | 0.9500   |
| C(5)-C(6)    | 1.398(7) |
| C(5)-H(5)    | 0.9500   |
| C(6)-C(7)    | 1.518(7) |
| C(7)-O(8)    | 1.445(6) |
| C(7)-H(7A)   | 0.9900   |
| C(7)-H(7B)   | 0.9900   |
| O(8)-C(10)   | 1.370(5) |
| O(9)-C(10)   | 1.179(6) |
| C(10)-C(11)  | 1.509(6) |
| C(11)-C(12)  | 1.516(6) |
| C(11)-H(11A) | 0.9900   |
| C(11)-H(11B) | 0.9900   |
| C(12)-C(13)  | 1.558(6) |
| C(12)-H(12A) | 0.9900   |
| C(12)-H(12B) | 0.9900   |
| C(13)-C(14)  | 1.489(7) |
| C(13)-H(13A) | 0.9900   |
| C(13)-H(13B) | 0.9900   |
| C(14)-C(15)  | 1.322(8) |
| C(14)-H(14)  | 0.9500   |
| C(15)-C(16)  | 1.506(7) |
| C(15)-H(15)  | 0.9500   |
| C(16)-C(17)  | 1.531(7) |
| C(16)-H(16A) | 0.9900   |
| C(16)-H(16B) | 0.9900   |
| C(17)-C(18)  | 1.539(6) |
| C(17)-H(17A) | 0.9900   |

|              |          |
|--------------|----------|
| C(17)-H(17B) | 0.9900   |
| C(18)-C(19)  | 1.496(7) |
| C(18)-H(18A) | 0.9900   |
| C(18)-H(18B) | 0.9900   |
| C(19)-O(20)  | 1.204(6) |
| C(19)-O(21)  | 1.331(5) |
| O(21)-C(22)  | 1.454(6) |
| C(22)-H(22A) | 0.9900   |
| C(22)-H(22B) | 0.9900   |
| N(23)-O(24)  | 1.218(6) |
| N(23)-O(25)  | 1.227(6) |

|                  |          |
|------------------|----------|
| C(6)-C(1)-C(2)   | 117.3(4) |
| C(6)-C(1)-C(22)  | 120.8(4) |
| C(2)-C(1)-C(22)  | 121.9(4) |
| C(3)-C(2)-C(1)   | 123.3(4) |
| C(3)-C(2)-N(23)  | 115.7(4) |
| C(1)-C(2)-N(23)  | 121.0(4) |
| C(4)-C(3)-C(2)   | 118.9(5) |
| C(4)-C(3)-H(3)   | 120.6    |
| C(2)-C(3)-H(3)   | 120.6    |
| C(3)-C(4)-C(5)   | 119.5(5) |
| C(3)-C(4)-H(4)   | 120.3    |
| C(5)-C(4)-H(4)   | 120.3    |
| C(4)-C(5)-C(6)   | 121.2(5) |
| C(4)-C(5)-H(5)   | 119.4    |
| C(6)-C(5)-H(5)   | 119.4    |
| C(1)-C(6)-C(5)   | 119.9(4) |
| C(1)-C(6)-C(7)   | 122.6(4) |
| C(5)-C(6)-C(7)   | 117.5(4) |
| O(8)-C(7)-C(6)   | 113.4(4) |
| O(8)-C(7)-H(7A)  | 108.9    |
| C(6)-C(7)-H(7A)  | 108.9    |
| O(8)-C(7)-H(7B)  | 108.9    |
| C(6)-C(7)-H(7B)  | 108.9    |
| H(7A)-C(7)-H(7B) | 107.7    |
| C(10)-O(8)-C(7)  | 115.5(4) |
| O(9)-C(10)-O(8)  | 123.0(4) |

|                     |          |
|---------------------|----------|
| O(9)-C(10)-C(11)    | 127.5(4) |
| O(8)-C(10)-C(11)    | 109.6(4) |
| C(10)-C(11)-C(12)   | 113.3(4) |
| C(10)-C(11)-H(11A)  | 108.9    |
| C(12)-C(11)-H(11A)  | 108.9    |
| C(10)-C(11)-H(11B)  | 108.9    |
| C(12)-C(11)-H(11B)  | 108.9    |
| H(11A)-C(11)-H(11B) | 107.7    |
| C(11)-C(12)-C(13)   | 110.5(4) |
| C(11)-C(12)-H(12A)  | 109.6    |
| C(13)-C(12)-H(12A)  | 109.6    |
| C(11)-C(12)-H(12B)  | 109.6    |
| C(13)-C(12)-H(12B)  | 109.6    |
| H(12A)-C(12)-H(12B) | 108.1    |
| C(14)-C(13)-C(12)   | 111.8(4) |
| C(14)-C(13)-H(13A)  | 109.3    |
| C(12)-C(13)-H(13A)  | 109.3    |
| C(14)-C(13)-H(13B)  | 109.3    |
| C(12)-C(13)-H(13B)  | 109.3    |
| H(13A)-C(13)-H(13B) | 107.9    |
| C(15)-C(14)-C(13)   | 126.0(5) |
| C(15)-C(14)-H(14)   | 117.0    |
| C(13)-C(14)-H(14)   | 117.0    |
| C(14)-C(15)-C(16)   | 124.8(5) |
| C(14)-C(15)-H(15)   | 117.6    |
| C(16)-C(15)-H(15)   | 117.6    |
| C(15)-C(16)-C(17)   | 110.0(4) |
| C(15)-C(16)-H(16A)  | 109.7    |
| C(17)-C(16)-H(16A)  | 109.7    |
| C(15)-C(16)-H(16B)  | 109.7    |
| C(17)-C(16)-H(16B)  | 109.7    |
| H(16A)-C(16)-H(16B) | 108.2    |
| C(16)-C(17)-C(18)   | 111.7(4) |
| C(16)-C(17)-H(17A)  | 109.3    |
| C(18)-C(17)-H(17A)  | 109.3    |
| C(16)-C(17)-H(17B)  | 109.3    |
| C(18)-C(17)-H(17B)  | 109.3    |
| H(17A)-C(17)-H(17B) | 107.9    |

|                     |          |
|---------------------|----------|
| C(19)-C(18)-C(17)   | 113.7(4) |
| C(19)-C(18)-H(18A)  | 108.8    |
| C(17)-C(18)-H(18A)  | 108.8    |
| C(19)-C(18)-H(18B)  | 108.8    |
| C(17)-C(18)-H(18B)  | 108.8    |
| H(18A)-C(18)-H(18B) | 107.7    |
| O(20)-C(19)-O(21)   | 122.3(4) |
| O(20)-C(19)-C(18)   | 125.9(4) |
| O(21)-C(19)-C(18)   | 111.7(4) |
| C(19)-O(21)-C(22)   | 115.6(4) |
| O(21)-C(22)-C(1)    | 106.0(4) |
| O(21)-C(22)-H(22A)  | 110.5    |
| C(1)-C(22)-H(22A)   | 110.5    |
| O(21)-C(22)-H(22B)  | 110.5    |
| C(1)-C(22)-H(22B)   | 110.5    |
| H(22A)-C(22)-H(22B) | 108.7    |
| O(24)-N(23)-O(25)   | 122.2(5) |
| O(24)-N(23)-C(2)    | 117.9(4) |
| O(25)-N(23)-C(2)    | 119.8(4) |

---

Symmetry transformations used to generate equivalent atoms:



**Table S36.** Anisotropic displacement parameters (  $\text{\AA}^2 \times 10^3$  ) for **10b**. The anisotropic displacement factor exponent takes the form:  $-2\pi^2[ h^2a^{*2}U^{11} + \dots + 2 h k a^* b^* U^{12} ]$

|       | U <sup>11</sup> | U <sup>22</sup> | U <sup>33</sup> | U <sup>23</sup> | U <sup>13</sup> | U <sup>12</sup> |
|-------|-----------------|-----------------|-----------------|-----------------|-----------------|-----------------|
| C(1)  | 34(2)           | 25(2)           | 25(2)           | 6(2)            | 3(2)            | 5(2)            |
| C(2)  | 39(2)           | 21(2)           | 27(2)           | 4(2)            | 1(2)            | 1(2)            |
| C(3)  | 50(3)           | 30(2)           | 31(3)           | 13(2)           | 11(2)           | 2(2)            |
| C(4)  | 65(4)           | 37(2)           | 19(2)           | 7(2)            | 15(2)           | 6(2)            |
| C(5)  | 61(3)           | 27(2)           | 26(2)           | -1(2)           | -3(2)           | 3(2)            |
| C(6)  | 34(2)           | 30(2)           | 26(2)           | 6(2)            | 5(2)            | 6(2)            |
| C(7)  | 31(2)           | 33(2)           | 36(3)           | 8(2)            | -1(2)           | 3(2)            |
| O(8)  | 33(2)           | 28(1)           | 32(2)           | 6(1)            | 10(1)           | 4(1)            |
| O(9)  | 53(2)           | 47(2)           | 26(2)           | 3(2)            | 10(2)           | 13(2)           |
| C(10) | 27(2)           | 25(2)           | 31(3)           | 0(2)            | 5(2)            | 1(2)            |
| C(11) | 30(2)           | 31(2)           | 21(2)           | -1(2)           | 9(2)            | 0(2)            |
| C(12) | 28(2)           | 36(2)           | 23(2)           | -2(2)           | 6(2)            | 5(2)            |
| C(13) | 44(2)           | 30(2)           | 30(2)           | 6(2)            | 5(2)            | 4(2)            |
| C(14) | 33(2)           | 38(2)           | 29(2)           | 8(2)            | 5(2)            | 2(2)            |
| C(15) | 42(2)           | 36(2)           | 24(2)           | 10(2)           | 4(2)            | -2(2)           |
| C(16) | 39(2)           | 45(3)           | 16(2)           | 4(2)            | 5(2)            | -4(2)           |
| C(17) | 40(2)           | 39(2)           | 17(2)           | 1(2)            | 6(2)            | -3(2)           |
| C(18) | 37(2)           | 34(2)           | 16(2)           | 0(2)            | 9(2)            | -2(2)           |
| C(19) | 32(2)           | 35(2)           | 18(2)           | -1(2)           | 11(2)           | -5(2)           |
| O(20) | 54(2)           | 69(3)           | 26(2)           | -2(2)           | 15(2)           | 19(2)           |
| O(21) | 44(2)           | 39(2)           | 17(2)           | 2(1)            | 6(1)            | 11(1)           |
| C(22) | 39(2)           | 35(2)           | 27(2)           | 2(2)            | 6(2)            | 10(2)           |
| N(23) | 44(2)           | 33(2)           | 41(3)           | 1(2)            | -6(2)           | -2(2)           |
| O(24) | 131(5)          | 35(2)           | 72(4)           | 4(2)            | -32(3)          | -20(3)          |
| O(25) | 74(3)           | 53(2)           | 44(2)           | -3(2)           | -19(2)          | -3(2)           |

**Table S37.** Hydrogen coordinates (  $\times 10^4$  ) and isotropic displacement parameters (  $\text{\AA}^2 \times 10^3$  ) for **10b**.

|        | x         | y      | z | U(eq) |
|--------|-----------|--------|---|-------|
| H(3)   | 75097853  | 277044 |   |       |
| H(4)   | 54707060  | 190948 |   |       |
| H(5)   | 25016319  | 237747 |   |       |
| H(7A)  | -7576396  | 391640 |   |       |
| H(7B)  | 2265878   | 331040 |   |       |
| H(11A) | 32034618  | 509732 |   |       |
| H(11B) | 50035207  | 548332 |   |       |
| H(12A) | 86324808  | 481035 |   |       |
| H(12B) | 68214186  | 453435 |   |       |
| H(13A) | 66343939  | 594842 |   |       |
| H(13B) | 95843867  | 569742 |   |       |
| H(14)  | 108904847 | 636040 |   |       |
| H(15)  | 63524627  | 708741 |   |       |
| H(16A) | 107475502 | 752840 |   |       |
| H(16B) | 86445279  | 811340 |   |       |
| H(17A) | 74856340  | 775738 |   |       |
| H(17B) | 52185895  | 727438 |   |       |
| H(18A) | 94596564  | 664234 |   |       |
| H(18B) | 81055951  | 616734 |   |       |
| H(22A) | 35977597  | 510740 |   |       |
| H(22B) | 17256962  | 496240 |   |       |

## 8. Calculated open-structures of monomers

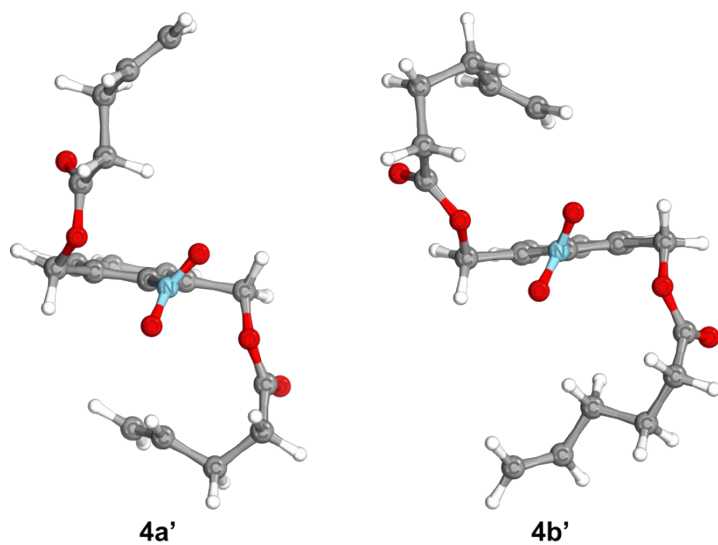

**Fig. S20.** Calculated structures of **4a'** and **4b'**.

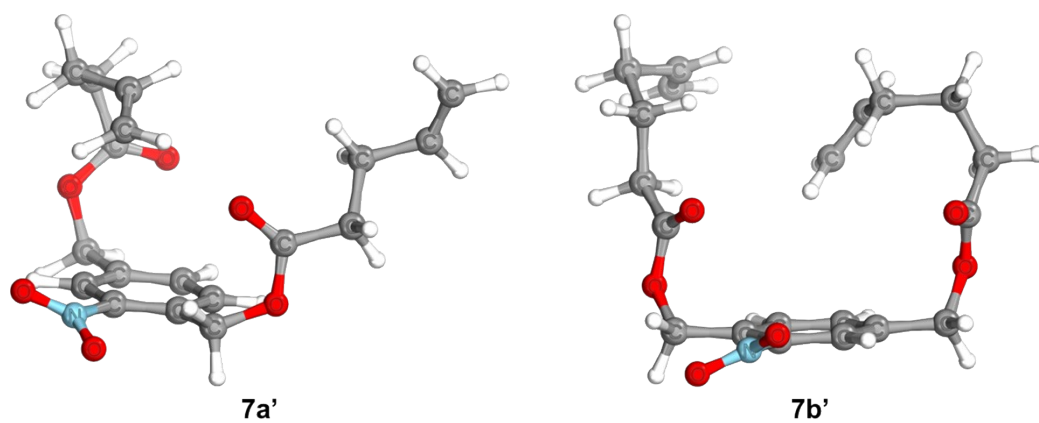

**Fig. S21.** Calculated structures of **7a'** and **7b'**.

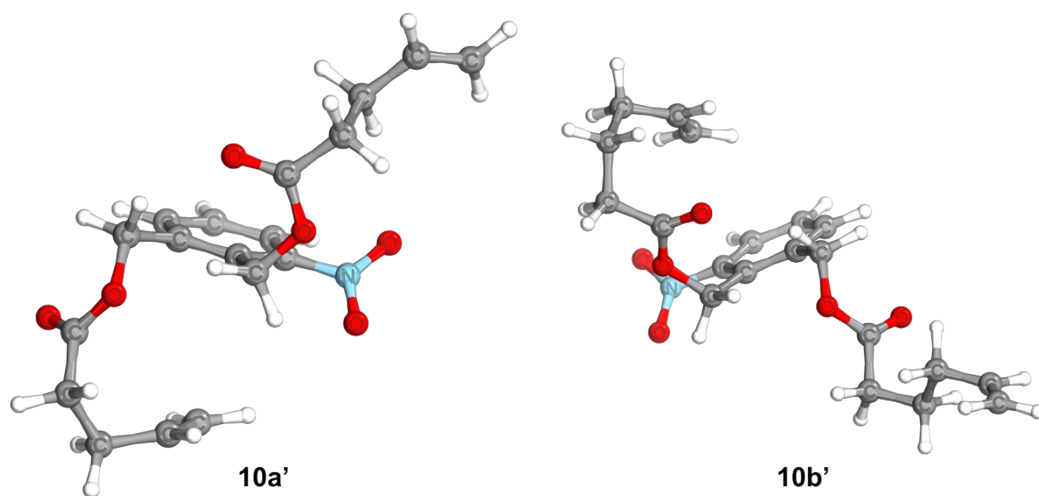

**Fig. S22.** Calculated structures of **10a'** and **10b'**.

**Table S38.** Calculated atomic coordinates for **4a'**.

|   | x        | y        | z        |
|---|----------|----------|----------|
| O | -0.56705 | -1.61984 | 0.757895 |
| O | 0.392309 | -1.21205 | -1.12046 |
| O | -2.48963 | -0.31415 | -1.32707 |
| O | -4.36775 | 0.896582 | -1.54106 |
| O | 3.437485 | 0.923168 | 0.6893   |
| O | 2.119884 | -0.7541  | 1.37896  |
| N | -0.1135  | -0.86673 | -0.07321 |
| C | -3.48835 | 0.715047 | 2.219204 |
| C | 6.0096   | -1.90774 | -2.8632  |
| C | -0.17811 | 0.552692 | 0.200019 |
| C | 0.504087 | 1.064971 | 1.301778 |
| C | 0.421264 | 2.427533 | 1.554909 |
| C | -0.33573 | 3.248163 | 0.737668 |
| C | -1.00737 | 2.724829 | -0.35454 |
| C | -0.92572 | 1.371364 | -0.64637 |
| C | -1.68021 | 0.767676 | -1.80216 |
| C | -3.80699 | -0.11269 | -1.19511 |
| C | -4.46322 | -1.29553 | -0.53118 |
| C | -4.86518 | -0.88877 | 0.899281 |
| C | -3.66538 | -0.48541 | 1.699805 |
| C | 5.764738 | -1.93792 | -1.56703 |
| C | 5.102711 | -0.83467 | -0.80261 |
| C | 3.826453 | -1.3295  | -0.11865 |
| C | 3.14494  | -0.24499 | 0.6723   |
| C | 1.347877 | 0.160403 | 2.161998 |
| H | -2.90936 | -1.25161 | 1.817783 |
| H | -2.60794 | 0.969416 | 2.785234 |
| H | -4.22345 | 1.495686 | 2.104537 |
| H | 6.043749 | -2.80327 | -0.97894 |
| H | 5.741277 | -1.05866 | -3.47092 |
| H | 6.492163 | -2.72493 | -3.3725  |
| H | 0.957298 | 2.841436 | 2.394525 |
| H | -0.39986 | 4.30394  | 0.950139 |
| H | -1.59978 | 3.366059 | -0.98843 |
| H | -0.99285 | 0.341195 | -2.53948 |
| H | -2.32303 | 1.514482 | -2.27677 |
| H | -5.35433 | -1.57126 | -1.09626 |
| H | -3.76082 | -2.12858 | -0.50861 |
| H | -5.35081 | -1.74495 | 1.374008 |

|   |          |          |          |
|---|----------|----------|----------|
| H | -5.5782  | -0.06381 | 0.849777 |
| H | 5.788067 | -0.45981 | -0.03676 |
| H | 4.85882  | -0.00451 | -1.46705 |
| H | 4.034889 | -2.16416 | 0.554219 |
| H | 3.109329 | -1.68649 | -0.86415 |
| H | 0.720425 | -0.47583 | 2.792834 |
| H | 2.01867  | 0.761357 | 2.783504 |

---

**Table S39.** Calculated atomic coordinates for **4b'**.

|   | x        | y        | z        |
|---|----------|----------|----------|
| O | 0.476339 | 1.550635 | 1.271157 |
| O | -0.55851 | 1.584296 | -0.6095  |
| O | -2.32232 | 0.622863 | 1.824792 |
| O | -3.99575 | -0.8707  | 1.796941 |
| O | 3.961853 | -0.37325 | -1.8801  |
| O | 2.071775 | 0.655686 | -1.24037 |
| N | -0.04924 | 1.007036 | 0.32521  |
| C | 3.19708  | -0.9309  | 1.823987 |
| C | -3.65033 | 0.58614  | -3.94254 |
| C | -1.44101 | -0.33181 | 2.427197 |
| C | -3.56529 | 0.220852 | 1.520592 |
| C | -4.31366 | 1.307473 | 0.792299 |
| C | -4.80657 | 0.801626 | -0.56896 |
| C | -3.64712 | 0.344736 | -1.46179 |
| C | -4.11871 | 0.022614 | -2.84508 |
| C | 4.353238 | -0.60939 | 1.273549 |
| C | 5.018792 | 0.722066 | 1.417136 |
| C | 5.341348 | 1.365541 | 0.065097 |
| C | 4.07698  | 1.741423 | -0.7099  |
| C | 3.404976 | 0.543044 | -1.32945 |
| C | 1.256247 | -0.37135 | -1.81328 |
| C | -0.08116 | -0.43994 | 0.31564  |
| C | -0.72774 | -1.11269 | 1.353272 |
| C | -0.76803 | -2.49911 | 1.320334 |
| C | -0.15888 | -3.19398 | 0.288878 |
| C | 0.490641 | -2.51398 | -0.72695 |
| C | 0.531076 | -1.12632 | -0.73159 |
| H | 4.895405 | -1.33495 | 0.680085 |
| H | 2.636379 | -0.22528 | 2.416312 |
| H | 2.761863 | -1.91008 | 1.711298 |
| H | -4.90045 | -0.72448 | -2.90349 |
| H | -4.01715 | 0.326278 | -4.92146 |
| H | -2.87311 | 1.332823 | -3.90581 |
| H | -0.7382  | 0.252426 | 3.027085 |
| H | -2.01789 | -1.00491 | 3.067714 |
| H | -5.17171 | 1.597589 | 1.402299 |
| H | -3.65255 | 2.165658 | 0.669423 |
| H | -5.49557 | -0.03059 | -0.4118  |
| H | -5.34866 | 1.609213 | -1.06432 |

|   |          |          |          |
|---|----------|----------|----------|
| H | -3.19847 | -0.55428 | -1.02486 |
| H | -2.88084 | 1.12162  | -1.50313 |
| H | 4.384496 | 1.391841 | 2.001887 |
| H | 5.957858 | 0.581788 | 1.96154  |
| H | 5.932934 | 0.676562 | -0.54127 |
| H | 5.930839 | 2.268263 | 0.233687 |
| H | 4.341776 | 2.405612 | -1.53778 |
| H | 3.358783 | 2.258165 | -0.07249 |
| H | 0.54028  | 0.128128 | -2.47577 |
| H | 1.891479 | -1.04631 | -2.39457 |
| H | -1.28421 | -3.03037 | 2.104675 |
| H | -0.19119 | -4.27239 | 0.27726  |
| H | 0.971916 | -3.0578  | -1.5248  |

---

**Table S40.** Calculated atomic coordinates for **7a'**.

|   | x        | y        | z        |
|---|----------|----------|----------|
| O | -1.45722 | -3.82431 | -0.59812 |
| O | 0.530473 | -3.74379 | -1.40266 |
| O | -3.0996  | -0.34885 | 0.786039 |
| O | -2.32627 | 0.416247 | -1.17376 |
| O | 3.112657 | 1.713171 | 1.352439 |
| O | 3.835988 | -0.25783 | 0.566971 |
| N | -0.33097 | -3.35985 | -0.63345 |
| C | -4.3332  | 5.134993 | -0.96675 |
| C | 1.089585 | 0.399337 | -2.03912 |
| C | 0.009254 | -2.31459 | 0.284591 |
| C | 1.363466 | -2.14066 | 0.562497 |
| C | 1.783838 | -1.16412 | 1.447522 |
| C | 0.825868 | -0.3567  | 2.052566 |
| C | -0.51609 | -0.52273 | 1.765858 |
| C | -0.96028 | -1.49412 | 0.87489  |
| C | -2.43092 | -1.58805 | 0.565269 |
| C | -2.97443 | 0.582652 | -0.1703  |
| C | -3.75468 | 1.823736 | 0.179152 |
| C | -3.05491 | 3.092275 | -0.32574 |
| C | -3.87992 | 4.308909 | -0.04312 |
| C | 2.015188 | 1.326092 | -1.87772 |
| C | 3.488173 | 1.07678  | -1.99376 |
| C | 4.248099 | 1.627167 | -0.77539 |
| C | 3.665239 | 1.064567 | 0.497334 |
| C | 3.255307 | -0.94181 | 1.684393 |
| H | -4.1003  | 4.484095 | 1.002302 |
| H | -4.1268  | 4.982549 | -2.01396 |
| H | -4.9228  | 6.001532 | -0.71867 |
| H | 1.733344 | 2.344366 | -1.64102 |
| H | 1.349932 | -0.61953 | -2.2814  |
| H | 0.037392 | 0.610868 | -1.94944 |
| H | 2.077188 | -2.78617 | 0.071784 |
| H | 1.135104 | 0.415618 | 2.740072 |
| H | -1.2447  | 0.11806  | 2.23837  |
| H | -2.91475 | -2.30967 | 1.229805 |
| H | -2.59457 | -1.90222 | -0.47089 |
| H | -4.73364 | 1.736652 | -0.30146 |
| H | -3.90925 | 1.852844 | 1.258135 |
| H | -2.87096 | 2.997014 | -1.39695 |



|   |          |          |          |
|---|----------|----------|----------|
| H | -2.0869  | 3.18575  | 0.175871 |
| H | 3.674974 | 0.006525 | -2.09213 |
| H | 3.87106  | 1.576892 | -2.88802 |
| H | 4.168171 | 2.714001 | -0.73195 |
| H | 5.298786 | 1.341523 | -0.84175 |
| H | 3.795706 | -1.88803 | 1.747589 |
| H | 3.412905 | -0.34757 | 2.590017 |

---

**Table S41.** Calculated atomic coordinates for **7b'**.

|   | x        | y        | z        |
|---|----------|----------|----------|
| O | 3.038572 | 3.506771 | 0.402507 |
| O | 1.206431 | 4.09434  | 1.351243 |
| O | -3.28906 | 1.304601 | -1.34439 |
| O | -3.36742 | 1.823216 | 0.836973 |
| O | 1.919643 | -0.36383 | 1.234819 |
| O | 3.11791  | -0.43568 | -0.6569  |
| N | 1.827249 | 3.446784 | 0.53024  |
| C | 1.21245  | -5.80054 | -0.55282 |
| C | -1.40392 | -2.23516 | -0.52333 |
| C | -2.4943  | 2.462809 | -1.618   |
| C | -3.64675 | 1.08245  | -0.07226 |
| C | -4.46334 | -0.18249 | 0.033884 |
| C | -4.19201 | -0.9343  | 1.338071 |
| C | -2.75158 | -1.45231 | 1.418678 |
| C | -2.42299 | -2.39017 | 0.300858 |
| C | 1.027018 | -5.12171 | 0.56411  |
| C | 2.11795  | -4.69414 | 1.494742 |
| C | 2.175079 | -3.16946 | 1.636384 |
| C | 2.610653 | -2.50353 | 0.33359  |
| C | 2.497158 | -1.00351 | 0.390337 |
| C | 3.071463 | 0.990506 | -0.71849 |
| C | 1.089407 | 2.588424 | -0.34792 |
| C | -0.25282 | 2.908806 | -0.55169 |
| C | -1.03355 | 2.157811 | -1.40888 |
| C | -0.4544  | 1.072454 | -2.06328 |
| C | 0.86651  | 0.740359 | -1.83832 |
| C | 1.669543 | 1.479007 | -0.97236 |
| H | 0.029496 | -4.82516 | 0.863305 |
| H | 0.39264  | -6.08868 | -1.18977 |
| H | 2.194838 | -6.10815 | -0.87437 |
| H | -3.08857 | -3.2385  | 0.196543 |
| H | -0.73076 | -1.39822 | -0.42579 |
| H | -1.18915 | -2.93636 | -1.31259 |
| H | -2.69484 | 2.706144 | -2.66471 |
| H | -2.81218 | 3.285006 | -0.96973 |
| H | -5.51546 | 0.113453 | -0.00408 |
| H | -4.25005 | -0.8068  | -0.834   |
| H | -4.88687 | -1.77323 | 1.41007  |
| H | -4.37406 | -0.26228 | 2.178549 |

|   |          |          |          |
|---|----------|----------|----------|
| H | -2.63135 | -1.98051 | 2.369832 |
| H | -2.05524 | -0.6107  | 1.416184 |
| H | 1.925916 | -5.12473 | 2.481433 |
| H | 3.081106 | -5.06815 | 1.142275 |
| H | 1.192032 | -2.78664 | 1.918187 |
| H | 2.873638 | -2.8995  | 2.430769 |
| H | 1.97547  | -2.84925 | -0.48698 |
| H | 3.639714 | -2.76243 | 0.077776 |
| H | 3.4785   | 1.402414 | 0.209133 |
| H | 3.729878 | 1.266309 | -1.5464  |
| H | -0.66325 | 3.756623 | -0.02336 |
| H | -1.05384 | 0.479376 | -2.73748 |
| H | 1.296898 | -0.11744 | -2.33364 |

---

**Table S42.** Calculated atomic coordinates for **10a'**.

|   | x        | y        | z        |
|---|----------|----------|----------|
| O | 2.337413 | -2.53972 | 0.607559 |
| O | 0.732206 | -2.03446 | 1.941644 |
| O | 1.437394 | 0.787264 | 1.303416 |
| O | 1.482943 | 2.438402 | -0.21182 |
| O | -4.00943 | 0.756733 | -1.75145 |
| O | -2.50351 | 1.624828 | -0.33251 |
| N | 1.24991  | -2.0525  | 0.844934 |
| C | -3.25317 | -1.91611 | 1.049354 |
| C | 6.487997 | -0.07699 | 0.394615 |
| C | 0.042662 | 0.568133 | 1.045975 |
| C | 2.050181 | 1.739555 | 0.593304 |
| C | 3.522234 | 1.782858 | 0.900908 |
| C | 4.2724   | 0.925026 | -0.13762 |
| C | 5.749139 | 0.976318 | 0.101723 |
| C | -3.78196 | -0.81595 | 1.550877 |
| C | -4.99985 | -0.13574 | 1.00792  |
| C | -4.67055 | 1.282871 | 0.508568 |
| C | -3.72341 | 1.184744 | -0.66085 |
| C | -1.48134 | 1.532884 | -1.33162 |
| C | -0.87737 | -0.61589 | -2.46034 |
| C | -0.23228 | -1.83866 | -2.52005 |
| C | 0.485098 | -2.28589 | -1.42725 |
| C | 0.517548 | -1.51208 | -0.27435 |
| C | -0.12358 | -0.27211 | -0.19531 |
| C | -0.81144 | 0.182217 | -1.32244 |
| H | -3.33084 | -0.33717 | 2.410883 |
| H | -2.37842 | -2.37574 | 1.47801  |
| H | -3.67985 | -2.40997 | 0.190956 |
| H | 6.196101 | 1.959217 | 0.026013 |
| H | 7.549669 | -0.00163 | 0.558771 |
| H | 6.059644 | -1.06316 | 0.477151 |
| H | -0.3319  | 0.043933 | 1.927192 |
| H | -0.4634  | 1.528415 | 0.94215  |
| H | 3.867112 | 2.815593 | 0.839207 |
| H | 3.697774 | 1.3863   | 1.900654 |
| H | 4.048838 | 1.312511 | -1.13603 |
| H | 3.925214 | -0.10845 | -0.08082 |
| H | -5.41907 | -0.71563 | 0.183919 |
| H | -5.75172 | -0.05526 | 1.797027 |

|   |          |          |          |
|---|----------|----------|----------|
| H | -4.20714 | 1.871653 | 1.299494 |
| H | -5.58774 | 1.768165 | 0.171642 |
| H | -1.92953 | 1.717121 | -2.31241 |
| H | -0.75637 | 2.318963 | -1.1014  |
| H | -1.43696 | -0.26451 | -3.31371 |
| H | -0.28361 | -2.43852 | -3.41477 |
| H | 1.007637 | -3.23044 | -1.4443  |

---

**Table S43.** Calculated atomic coordinates for **10b'**.

|   | x        | y        | z        |
|---|----------|----------|----------|
| O | 3.452722 | 2.960817 | 0.096884 |
| O | 1.923099 | 2.922182 | 1.602304 |
| O | 2.078136 | -0.06447 | 1.485982 |
| O | 1.570991 | -2.11038 | 0.720243 |
| O | -3.34941 | 0.629878 | -1.17379 |
| O | -2.00648 | -0.4889  | 0.231448 |
| N | 2.336422 | 2.682839 | 0.48667  |
| C | -7.6497  | -2.76896 | 1.124036 |
| C | 3.621914 | -0.40746 | -1.91673 |
| C | 0.736218 | 0.384419 | 1.249364 |
| C | 2.367778 | -1.33889 | 1.195736 |
| C | 3.776819 | -1.66997 | 1.615681 |
| C | 4.44117  | -2.70608 | 0.708568 |
| C | 4.915958 | -2.09621 | -0.61417 |
| C | 3.779033 | -1.64022 | -1.47151 |
| C | -6.95844 | -1.92357 | 0.382974 |
| C | -5.53968 | -1.52632 | 0.645264 |
| C | -5.42048 | -0.01543 | 0.871434 |
| C | -3.97437 | 0.404436 | 1.151191 |
| C | -3.10564 | 0.214305 | -0.06818 |
| C | -1.07398 | -0.73807 | -0.82749 |
| C | -0.20339 | 0.460176 | -1.11202 |
| C | -0.22998 | 1.033297 | -2.37978 |
| C | 0.584698 | 2.1048   | -2.70128 |
| C | 1.439015 | 2.623083 | -1.74711 |
| C | 1.441531 | 2.07893  | -0.46896 |
| C | 0.626059 | 0.996691 | -0.12436 |
| H | -7.4146  | -1.45528 | -0.48031 |
| H | -7.21976 | -3.24853 | 1.988914 |
| H | -8.67128 | -3.02476 | 0.897781 |
| H | 3.059816 | -2.40722 | -1.72996 |
| H | 4.317639 | 0.380161 | -1.67314 |
| H | 2.79504  | -0.13094 | -2.54923 |
| H | 0.053069 | -0.45834 | 1.361549 |
| H | 0.53558  | 1.129556 | 2.022988 |
| H | 4.354955 | -0.74628 | 1.659937 |
| H | 3.700977 | -2.06903 | 2.631792 |
| H | 3.727599 | -3.50824 | 0.5099   |
| H | 5.299959 | -3.1313  | 1.230494 |

|   |          |          |          |
|---|----------|----------|----------|
| H | 5.47726  | -2.85991 | -1.16106 |
| H | 5.589099 | -1.25978 | -0.41384 |
| H | -5.15946 | -2.0614  | 1.517932 |
| H | -4.92718 | -1.80339 | -0.21867 |
| H | -6.04553 | 0.272015 | 1.718843 |
| H | -5.77633 | 0.516425 | -0.01326 |
| H | -3.55207 | -0.16576 | 1.978527 |
| H | -3.94954 | 1.467409 | 1.403477 |
| H | -0.46671 | -1.58357 | -0.49069 |
| H | -1.62862 | -1.01265 | -1.72965 |
| H | -0.89608 | 0.626065 | -3.12494 |
| H | 0.559162 | 2.530111 | -3.69206 |
| H | 2.096432 | 3.449948 | -1.9695  |

---

## 9. Reference

- 1 Y. Zhang, Y. Guo, S. Wu, H. Liang and H. Xu, *ACS Omega*, 2017, **2**, 2536-2543.
- 2 O. Eckardt, S. Seupel, G. Festag, M. Gottschaldt and F. H. Schacher, *Polym. Chem.*, 2019, **10**, 593-602.
- 3 M. Todorovic, K. D. Schwab, J. Zeisler, C. Zhang, F. Bénard and D. M. Perrin, *Angew. Chem. Int. Ed.*, 2019, **58**, 14120-14124.
- 4 M. Kimura, H. Narikawa, K. Ohta, K. Hanabusa, H. Shirai and N. Kobayashi, *Chem. Mater.*, 2002, **14**, 2711-2717.
- 5 J. D. Nobbs, N. Z. B. Zainal, J. Tan, E. Drent, L. P. Stubbs, C. Li, S. C. Y. Lim, D. G. A. Kumbang and M. van Meurs, *ChemistrySelect*, 2016, **1**, 539-544.
- 6 M. T. Mwangi, M. B. Runge and N. B. Bowden, *J. Am. Chem. Soc.*, 2006, **128**, 14434-14435.
- 7 C. Bannwarth, S. Ehlert and S. Grimme, *J. Chem. Theory Comput.*, 2019, **15**, 1652-1671.
- 8 P. Pracht, F. Bohle and S. Grimme, *Phys. Chem. Chem. Phys.*, 2020, **22**, 7169-7192.
- 9 M. W. Wong, K. B. Wiberg and M. J. Frisch, *J. Am. Chem. Soc.*, 1992, **114**, 523-529.
